# Supplementary material for: Eye-tracking control of an adjustable electric bed: construction and validation by immobile patients with multiple sclerosis
Source: Springer Nature journal article supplement (doi:10.1186/s12984-023-01193-w), 2023-06-09

# Instructions for contactless operation of the adjustable bed application

## Standby mode

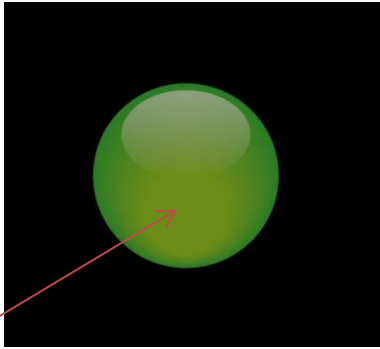

### Starting the application

Looking at the flashing green ball, a confirmation element is generated.

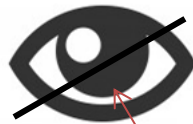

Interrupting the view returns the application to waiting

## Confirmation element

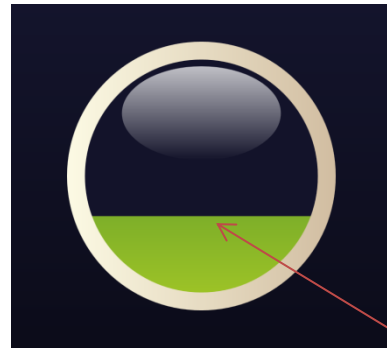

Looking at the center of the element starts its filling and then opens the segment selection (change of pos 

## Location selection

By looking at the top and bottom dots, we control the positioning to raise/decrease the angle of adjustment of the Bed.

By keeping the gaze on the confirmation element, we change the positioning. 

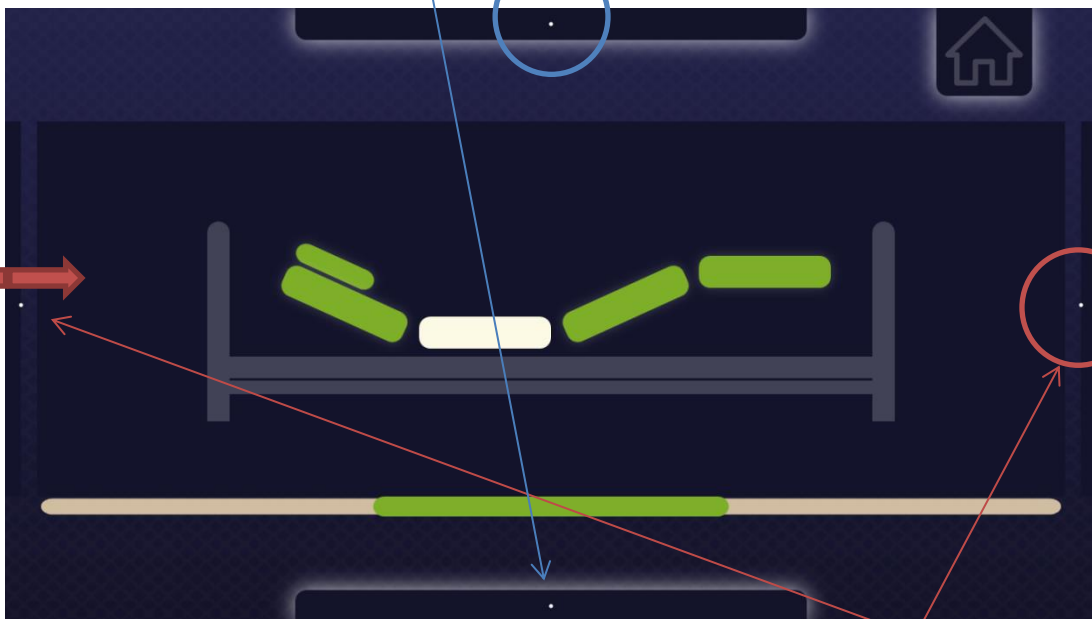

Interrupt the positioning by closing your eyes or interrupting the view of the confirmation element! 

By looking at the white dot on the left or right, we scroll through the segments to the left/right.

## Segment selection

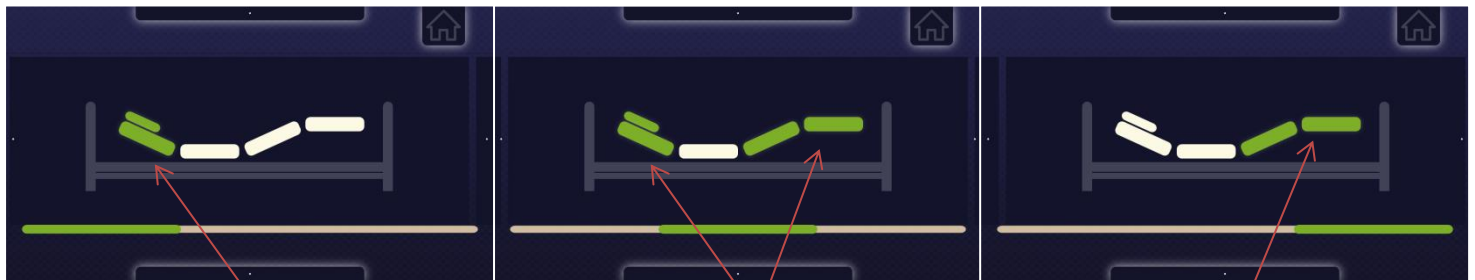

Headrest control

Headrest and leg rest control

Leg rest control

It is possible to choose from three offered positioning

## Basic position (CPR)

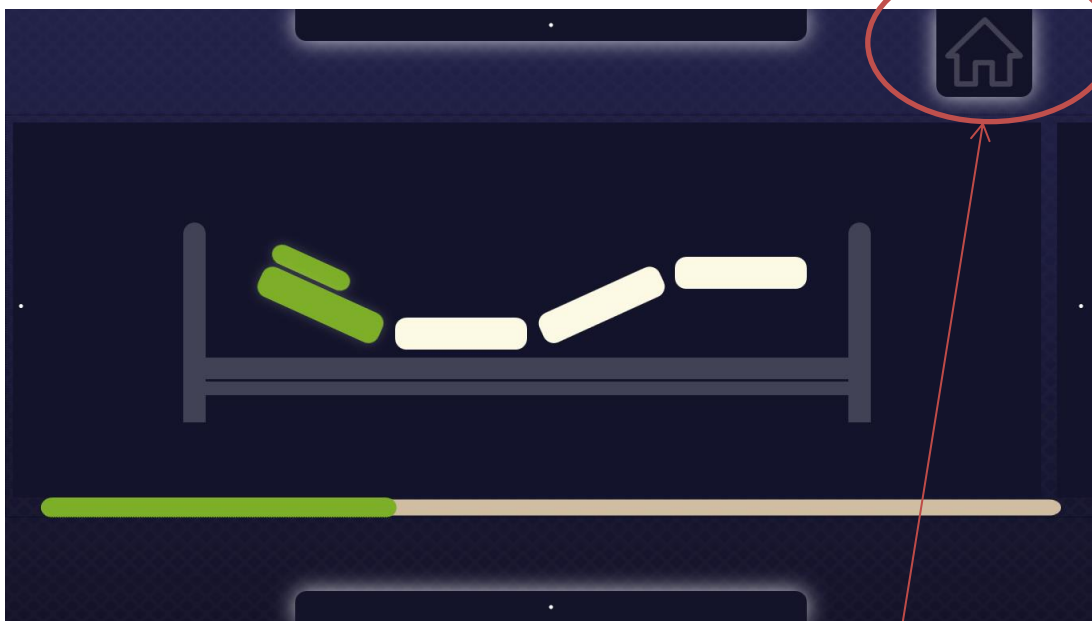

To bring the bed into the basic – straight low position, we move our eyes to the house in the upper right corner.

Confirm with the confirmation element.

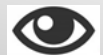

Supplement: MOESM1 [file 25469160]
