# Supplementary material for: Eye-tracking control of an adjustable electric bed: construction and validation by immobile patients with multiple sclerosis
Source: Springer Nature journal article supplement (doi:10.1186/s12984-023-01193-w), 2023-06-09
Supplement: MOESM3 [file 25469160]

Information, questionnaire and experiment protocol for  
**Contactless control of positioning bed (Sample page)**

investigator: Martin Kopeček, MEng, kopecema@lfhk.cuni.cz

Fill in the questionnaire as soon as possible after the test.

Questions for the instructor

Day of experiment performed:

Name of instructor:

Patient name:

sex:

age:

Application log number:

Type of restriction: Multiple sclerosis, Paraparesis, Paraplegia, Quadriplegia, Pentaplegia,  
Muscular dystrophy, ALS

Other:

Momentum description:

Glasses/Contact Lenses: Yes / No

Experiment log:

1. Sensor calibration
2. Explaining the principle and allowing you to gain experience with control, at least 10 minutes
3. Putting applications in initial conditions – bed at zero position

Time at start of testing: ..... ..

4. Test 1 
  - a) initiate eye contact with the application
  - b) raise the leg rest (for 2-3 s)
  - c) raise the headrest (for 2-3 s)
  - d) lower the leg rest (for 2-3 s)
  - e) lower the headrest (for 2-3 s)
  - f) break eye contact with the app

7. Test 2 – repetition of Test 1

8. Test 3 – repetition of Test 1

Time at end of testing:..... ..

Instructor's notes on the experiment:

## Questions for the patient

Have you gained certainty of control? *yes / rather yes/ don't know / rather no / no*

How satisfied are you with the operation of the application?

|                          |                                                                 |
|--------------------------|-----------------------------------------------------------------|
| Activating control       | <i>very easy / easy / ordinary / difficult / very difficult</i> |
| Information on bed setup | <i>very easy / easy / ordinary / difficult/ very difficult</i>  |
| Position selection       | <i>very easy / easy / ordinary / difficult / very difficult</i> |
| Clarity of control       | <i>very clear / clear / common / confusing / very confusing</i> |

Would you prefer to control in a different way? *yes / rather yes/ don't know / rather no / no*

*If so, which ones (e.g. speech)? .....*

Do you have any insight into the test or control?

---



---

How would you rate yourand current pain intensity on the above image scale?

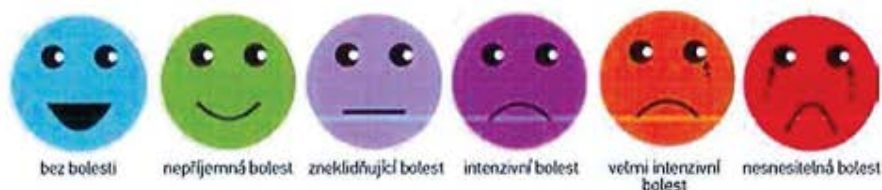

|                                                                      |                            |                          |                                                                             |
|----------------------------------------------------------------------|----------------------------|--------------------------|-----------------------------------------------------------------------------|
| <b>MALÁ NEBO ŽÁDNÁ BOLEST</b><br>Jste schopni se bolesti přizpůsobit | Velmi mírná bolest         | <input type="checkbox"/> | Velmi lehká, sotva ztelná bolest                                            |
|                                                                      | Nepřijemná bolest          | <input type="checkbox"/> | Menší bolest, lze ji přirovnat k lehkému štipání                            |
|                                                                      | Přijatelná bolest          | <input type="checkbox"/> | Velmi nápadná bolest podobající se pichnutí injekce                         |
| <b>MÍRNÁ BOLEST</b><br>Neslučitelná s mnoha aktivitami               | Zneklidňující bolest       | <input type="checkbox"/> | Silná, hluboká bolest                                                       |
|                                                                      | Velmi zneklidňující bolest | <input type="checkbox"/> | Silná, hluboká, pronikavá bolest, např. vyvrknutý kotník                    |
|                                                                      | Intenzivní bolest          | <input type="checkbox"/> | Ještě silnější bolest srovnatelná s bodnutím několika včelích žihadel       |
| <b>TĚŽKÁ BOLEST</b><br>Nejste schopni fungovat                       | Velmi intenzivní bolest    | <input type="checkbox"/> | Bolest srovnatelná s průměrnou migrénou                                     |
|                                                                      | Naprostá hrozná bolest     | <input type="checkbox"/> | Bolest srovnatelná s porodem nebo opravdu silnou migrénou                   |
|                                                                      | Nesnesitelná bolest        | <input type="checkbox"/> | Bolest nelze ignorovat, vyžaduje léky proti bolesti, nutně navštívit lékaře |

How would you assess your usual level of visual attention or stamina when watching a regular feature film?

*I watch without problems / I watch with breaks / I can't watch / I don't care*

Thank you for participating in the experiment and filling out the questionnaire...

19

VIDEO

P1

## Informace, dotazník a protokol experimentu pro Bezkontaktní ovládání polohovacího lůžka

řešitel: Ing. Martin Kopeček, MEng, kopecema@lfhk.cuni.cz

Dotazník vyplňte co možná nejdříve po provedení testu.

### Otázky pro instruktora

Experiment proveden dne: 10.3.2021

Jméno instruktora: MK

Jméno pacienta: \_\_\_\_\_ Pohlaví: M Věk: 67

Číslo logu aplikace: 2

Typ omezení: Paraparéza, Paraplegie, Kvadruplegie, Pentaplegie, Svalové dystrofie, ALS,

Jiné: RS

Popis hybnosti: HYBNOST ZOUZE HLAVA, RUKY  
KUTNOST ASISTENČNÍ, ZVEDÁK

Brýle / kontaktní čočky: PŘI EXPERIMENTU NEBYLY ano /  ne

### Protokol experimentu:

1. Kalibrace senzoru
2. Vysvětlení principu a umožnění získat zkušenost s ovládáním, alespoň 10 minut
3. Uvedení aplikaci do počátečních podmínek – lůžko v bodě nula  
Čas při započetí testování: 11:20
4. Test 1 
  - a) zahájit oční kontakt s aplikací
  - b) zvednout podpěru nohou (po dobu 2-3 s)
  - c) zvednout podpěru hlavy (po dobu 2-3 s)
  - d) snížit podpěru nohou (po dobu 2-3 s)
  - e) snížit podpěru hlavy (po dobu 2-3 s)
  - f) přerušit oční kontakt s aplikací
7. Test 2 – opakování Testu 1
8. Test 3 – opakování Testu 1   
Čas při ukončení testování: 11:35

Poznámky instruktora k experimentu:

KALIBRACE 2X -> ZLEPŠENÍ  
170' EL. VOZÍK NA DRÁDU VE  
VÝROBĚ



**Otázky pro pacienta**

Získal/a jste jistotu v ovládnání?

ano / spíše ano / nevím / spíše ne / ne

Jak jste spokojen/a s ovládnáním aplikace?

- aktivace ovládnání velmi snadná / snadná / běžná / obtížná / velmi obtížná
- způsob volby polohy velmi snadný / snadný / běžný / obtížný / velmi obtížný
- informace o nastavení lůžka velmi snadné / snadné / běžné / obtížné / velmi obtížné
- přehlednost ovládnání velmi přehledné / přehledné / běžné / nepřehledné / velmi nepřehledné

Upřednostnil/a byste ovládnání jiným způsobem?

ano / spíše ano / nevím / spíše ne / ne

Pokud ano jakým (např. řeč)? ..... BUDE OVLÁDÁNÍ ŘEČÍ TV - TELEFON

Máte nějaký poznatek k testu nebo ovládnání?

STAV OK, VELIKOST OBRAZOVY "V POMOC"

Jak byste hodnotil/a Vaši aktuální intenzitu bolesti na uvedené obrazové škále?

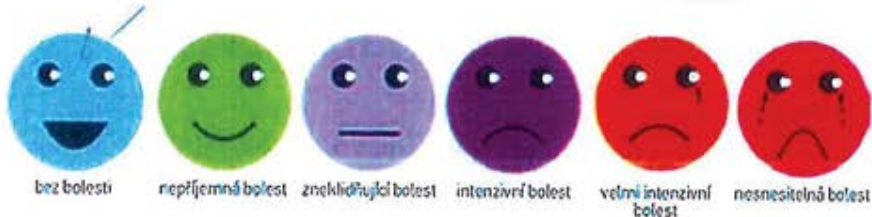

|                                                                      |                            |                          |                                                                             |
|----------------------------------------------------------------------|----------------------------|--------------------------|-----------------------------------------------------------------------------|
| <b>MALÁ NEBO ŽÁDNÁ BOLEST</b><br>Jste schopni se bolesti přizpůsobit | Velmi mírná bolest         | <input type="checkbox"/> | Velmi lehká, sotva znatelná bolest                                          |
|                                                                      | Nepřjemná bolest           | <input type="checkbox"/> | Menší bolest, lze ji přirovnat k lehkému šlupání                            |
|                                                                      | Přijatelná bolest          | <input type="checkbox"/> | Velmi nápadná bolest podobající se píchnutí injekce                         |
| <b>MÍRNÁ BOLEST</b><br>Neslučitelná s mnoha aktivitami               | Zneklidňující bolest       | <input type="checkbox"/> | Silná, hluboká bolest                                                       |
|                                                                      | Velmi zneklidňující bolest | <input type="checkbox"/> | Silná, hluboká, pronikavá bolest, např. vyvrknutý kotník                    |
|                                                                      | Intenzivní bolest          | <input type="checkbox"/> | Jelikož silnější bolest srovnatelná s bodnutím několika včelích žihadel     |
| <b>TĚŽKÁ BOLEST</b><br>Nejste schopni fungovat                       | Velmi intenzivní bolest    | <input type="checkbox"/> | Bolest srovnatelná s průměrnou migrénou                                     |
|                                                                      | Náprsto hrozná bolest      | <input type="checkbox"/> | Bolest srovnatelná s porodem nebo opravdu silnou migrénou                   |
|                                                                      | Nesnesitelná bolest        | <input type="checkbox"/> | Bolest nelze ignorovat, vyžaduje léky proti bolesti, nutné navštívit lékaře |

Jak byste posoudil/a Vaši obvyklou míru zrakové pozornosti nebo výdrže při sledování běžného celovečerního filmu?

sleduji bez problémů / sleduji s přestávkami / nemůžu sledovat / nezajímá mne to

Děkujeme Vám za účast v experimentu a při vyplnění dotazníku...

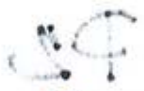

# Informace, dotazník a protokol experimentu pro Bezkontaktní ovládání polohovacího lůžka

řešitel: Ing. Martin Kopeček, MEng, kopecema@lfhk.cuni.cz

P2

Dotazník vyplňte co možná nejdříve po provedení testu.

## Otázky pro instruktora

Experiment proveden dne: 4.5.2021

Jméno instruktora: MK

Jméno pacienta: \_\_\_\_\_ hlavi: M Věk: 73

Číslo logu aplikace: \_\_\_\_\_ 1,2,3

Typ omezení: Paraparéza, Paraplegie, Kvadruplegie, Pentaplegie, Svalové dystrofie, ALS,

Jiné: RS

Popis hybnosti: 'DOLNÍ KONČETINY NE, RUCI HORŠÍ'  
STISK A JINOS PLOUČÍKA

Brýle / kontaktní čočky:  ano / ne

## Protokol experimentu:

1. Kalibrace senzoru
2. Vysvětlení principu a umožnění získat zkušenost s ovládáním, alespoň 10 minut
3. Uvedení aplikaci do počátečních podmínek – lůžko v bodě nula   
Čas při započetí testování: 12:30
4. Test 1 
  - a) zahájit oční kontakt s aplikací
  - b) zvednout podpěru nohou (po dobu 2-3 s)
  - c) zvednout podpěru hlavy (po dobu 2-3 s)
  - d) snížit podpěru nohou (po dobu 2-3 s)
  - e) snížit podpěru hlavy (po dobu 2-3 s)
  - f) přerušit oční kontakt s aplikací
7. Test 2 – opakování Testu 1
8. Test 3 – opakování Testu 1   
Čas při ukončení testování: 12:50

Poznámky instruktora k experimentu:



**Otázky pro pacienta**

Získal/a jste jistotu v ovládnání? ano / spíše ano / nevím / spíše ne / ne

Jak jste spokojen/a s ovládním aplikace?

- aktivace ovládní velmi snadná / snadná / běžná / obtížná / velmi obtížná
- způsob volby polohy velmi snadný / snadný / běžný / obtížný / velmi obtížný
- informace o nastavení lůžka velmi snadné / snadné / běžné / obtížné / velmi obtížné
- přehlednost ovládní velmi přehledné / přehledné / běžné / nepřehledné / velmi nepřehledné

Upřednostnil/a byste ovládní jiným způsobem? ano / spíše ano / nevím / spíše ne / ne

Pokud ano jakým (např. řeč)? .....

Máte nějaký poznatek k testu nebo ovládní?

DOBRA OSTROST -> BOPRIVNOST OIK-EBURNA OU  
POBADI' TROCHU SVETLEJI'

Jak byste hodnotil/a Vaši aktuální intenzitu bolesti na uvedené obrazové škále?

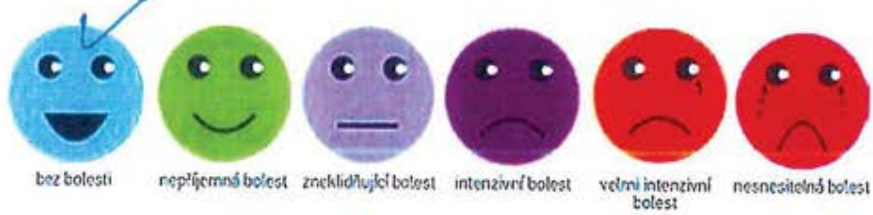

|                                                                      |                            |                          |                                                                             |
|----------------------------------------------------------------------|----------------------------|--------------------------|-----------------------------------------------------------------------------|
| <b>MALÁ NEBO ŽÁDNÁ BOLEST</b><br>Jste schopni se bolesti přizpůsobit | Velmi mírná bolest         | <input type="checkbox"/> | Velmi těžká, sotva znatelná bolest                                          |
|                                                                      | Nepřijemná bolest          | <input type="checkbox"/> | Méně bolest, lze ji přirovnat k lehkému štípání                             |
|                                                                      | Přijatelná bolest          | <input type="checkbox"/> | Velmi nápadná bolest podobající se píchnutí injekce                         |
| <b>MÍRNÁ BOLEST</b><br>Neslučitelná s mnoha aktivitami               | Zneklidňující bolest       | <input type="checkbox"/> | Silná, hluboká bolest                                                       |
|                                                                      | Velmi zneklidňující bolest | <input type="checkbox"/> | Silná, hluboká, pronikavá bolest, např. vyvrknutý kotník                    |
|                                                                      | Intenzivní bolest          | <input type="checkbox"/> | Ještě silnější bolest srovnatelná s bodnutím několika včelích žihadel       |
| <b>TĚŽKÁ BOLEST</b><br>Nejste schopni fungovat                       | Velmi intenzivní bolest    | <input type="checkbox"/> | Bolest srovnatelná s průměrnou migrénou                                     |
|                                                                      | Naprostá hrozná bolest     | <input type="checkbox"/> | Bolest srovnatelná s porodem nebo správnou silnou migrénou                  |
|                                                                      | Nesnesitelná bolest        | <input type="checkbox"/> | Bolest nelze ignorovat, vyžaduje léky proti bolesti, nutné navštívit lékaře |

Jak byste posoudil/a Vaši obvyklou míru zrakové pozornosti nebo výdrže při sledování běžného celovečerního filmu?

sleduji bez problému / sleduji s přestávkami / nemůžu sledovat / nezajímá mne to

Děkujeme Vám za účast v experimentu a při vyplnění dotazníku...

EF

Φ3

**Informace, dotazník a protokol experimentu pro  
Bezkontaktní ovládání polohovacího lůžka**

řešitel: Ing. Martin Kopeček, MEng, kopecema@lfhk.cuni.cz

Dotazník vyplňte co možná nejdříve po provedení testu.

**Otázky pro instruktora**

Experiment proveden dne: 20.3.2021

Jméno instruktora: M11

Jméno pacienta: " " Pohlaví: E Věk: 67

Číslo logu aplikace: 1, 2, 3

Typ omezení: Paraparéza, Paraplegie, Kvadruplegie, Pentaplegie, Svalové dystrofie, ALS,

Jiné: RS

Popis hybnosti: RUC - CZE - PAS - BUB - OVLADAT OVLADAC  
EL. INV. VZBUIK

Brýle / kontaktní čočky: ano  ne

**Protokol experimentu:**

- 1. Kalibrace senzoru
- 2. Vysvětlení principu a umožnění získat zkušenost s ovládáním, alespoň 10 minut
- 3. Uvedení aplikaci do počátečních podmínek – lůžko v bodě nula   
Čas při započítí testování: 7:45
- 4. Test 1 
  - a) zahájit oční kontakt s aplikací
  - b) zvednout podpěru nohou (po dobu 2-3 s)
  - c) zvednout podpěru hlavy (po dobu 2-3 s)
  - d) snížit podpěru nohou (po dobu 2-3 s)
  - e) snížit podpěru hlavy (po dobu 2-3 s)
  - f) přerušit oční kontakt s aplikací
- 7. Test 2 – opakování Testu 1
- 8. Test 3 – opakování Testu 1   
Čas při ukončení testování: 8:15

Poznámky instruktora k experimentu: LEPE NASTAVIT SENZOR



**Otázky pro pacienta**

Získal/a jste jistotu v ovládnání?

ano / spíše ano / nevím / spíše ne / ne

Jak jste spokojen/a s ovládním aplikace?

- aktivace ovládní velmi snadná / snadná / běžná / obtížná / velmi obtížná
- způsob volby polohy velmi snadný / snadný / běžný / obtížný / velmi obtížný
- informace o nastavení lůžka velmi snadně / snadné / běžné / obtížné / velmi obtížné
- přehlednost ovládní velmi přehledně / přehledně / běžně / nepřehledně / velmi nepřehledně

Upřednostnil/a byste ovládní jiným způsobem?

ano / spíše ano / nevím / spíše ne / ne

Pokud ano jakým (např. řeč)? ..... POMOCÍ RUKOU .....

Máte nějaký poznatek k testu nebo ovládní?

PŘI TEPLOTĚ NEBO UDRŽENÍ STISKU

Jak byste hodnotil/a Vaši aktuální intenzitu bolesti na uvedené obrazové škále?

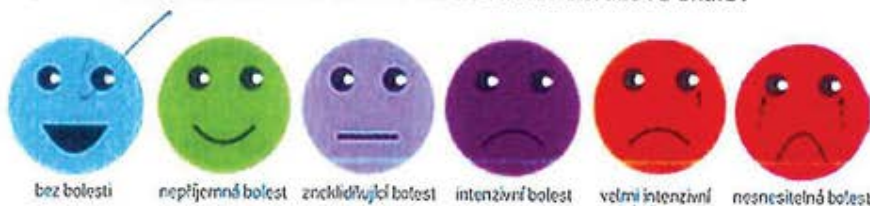

|                                                                      |                            |                          |                                                                             |
|----------------------------------------------------------------------|----------------------------|--------------------------|-----------------------------------------------------------------------------|
| <b>MALÁ NEBO ŽÁDNÁ BOLEST</b><br>Jste schopni se bolesti přizpůsobit | Velmi mírná bolest         | <input type="checkbox"/> | Velmi lehká, sotva znatelná bolest                                          |
|                                                                      | Nepřijemná bolest          | <input type="checkbox"/> | Menší bolest, lze ji přirovnat k lehkému šitpíní                            |
|                                                                      | Přijatelná bolest          | <input type="checkbox"/> | Velmi nápadná bolest podobající se píchnutí injekce                         |
| <b>MÍRNÁ BOLEST</b><br>Neslučitelná s mnoha aktivitami               | Zneklidňující bolest       | <input type="checkbox"/> | Silná, hluboká bolest                                                       |
|                                                                      | Velmi zneklidňující bolest | <input type="checkbox"/> | Silná, hluboká, pronikavá bolest, např. vyvrknutý kotník                    |
|                                                                      | Intenzivní bolest          | <input type="checkbox"/> | Ještě silnější bolest srovnatelná s bodnutím několika včelích žihadel       |
| <b>TĚŽKÁ BOLEST</b><br>Nejste schopni fungovat                       | Velmi intenzivní bolest    | <input type="checkbox"/> | Bolest srovnatelná s průměrnou migrénou                                     |
|                                                                      | Naprostá hrzná bolest      | <input type="checkbox"/> | Bolest srovnatelná s porodem nebo oprávně silnou migrénou                   |
|                                                                      | Nesnesitelná bolest        | <input type="checkbox"/> | Bolest nelze ignorovat, vyžaduje léky proti bolesti, nutné navštívit lékaře |

Jak byste posoudil/a Vaši obvyklou míru zrakové pozornosti nebo výdrže při sledování běžného celovečerního filmu?

sleduji bez problémů / sleduji s přestávkami / nemůžu sledovat / nezajímá mne to

Děkujeme Vám za účast v experimentu a při vyplnění dotazníku...



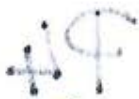

P4

# Informace, dotazník a protokol experimentu pro Bezkontaktní ovládání polohovacího lůžka

řešitel: Ing. Martin Kopeček, MEng, kopecema@lfhk.cuni.cz

Dotazník vyplňte co možná nejdříve po provedení testu.

## Otázky pro instruktora

Experiment proveden dne: 10.5.2021

Jméno instruktora: MK

Jméno pacienta: Pohlaví: M Věk: 57

Číslo logu aplikace:

Typ omezení: Paraparéza, Paraplegie, Kvadruplegie, Pentaplegie, Svalové dystrofie, ALS,

Jiné: RS, OSTEOPOROZA

Popis hybnosti: EL. VOZÍK + FR. HOLE, POUŠPATI  
KONSTRUKCI MELZE MOC RUKAVIC

Brýle / kontaktní čočky: BŮJE NA DÁLKU DOPŘÍMOUT OČI ano /  ne

## Protokol experimentu:

1. Kalibrace senzoru
2. Vysvětlení principu a umožnění získat zkušenost s ovládáním, alespoň 10 minut
3. Uvedení aplikaci do počátečních podmínek – lůžko v bodě nula   
Čas při započetí testování: 9:00
4. Test 1 
  - a) zahájit oční kontakt s aplikací
  - b) zvednout podpěru nohou (po dobu 2-3 s)
  - c) zvednout podpěru hlavy (po dobu 2-3 s)
  - d) snížit podpěru nohou (po dobu 2-3 s)
  - e) snížit podpěru hlavy (po dobu 2-3 s)
  - f) přerušit oční kontakt s aplikací
7. Test 2 – opakování Testu 1
8. Test 3 – opakování Testu 1   
Čas při ukončení testování: 9:19

Poznámky instruktora k experimentu:

Získal/a jste jistotu v ovládní?

ano / spíše ano / nevím / spíše ne / ne

Jak jste spokojen/a s ovládním aplikace?

aktivace ovládní velmi snadná / snadná / běžná / obtížná / velmi obtížná  
 způsob volby polohy velmi snadný / snadný / běžný / obtížný / velmi obtížný  
 informace o nastavení lůžka velmi snadné / snadné / běžné / obtížné / velmi obtížné  
 přehlednost ovládní velmi přehledné / přehledné / běžné / nepřehledné / velmi nepřehledné

Upřednostnil/a byste ovládní jiným způsobem?

ano / spíše ano / nevím / spíše ne / ne

Pokud ano jakým (např. řeč)? ..... POTTOL TLUKOU .....

Máte nějaký poznatek k testu nebo ovládní?

Jak byste hodnotil/a Vaši aktuální intenzitu bolesti na uvedené obrazové škále?

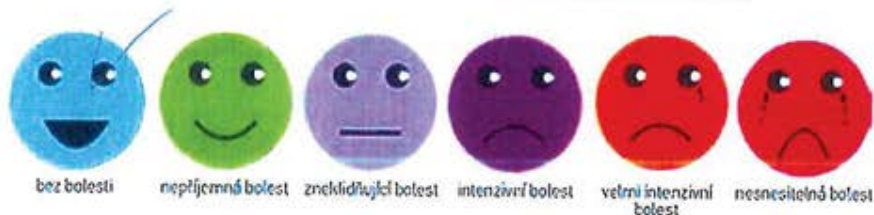

|                                                                      |                            |                          |                                                                             |
|----------------------------------------------------------------------|----------------------------|--------------------------|-----------------------------------------------------------------------------|
| <b>MALÁ NEBO ŽÁDNÁ BOLEST</b><br>Jste schopni se bolesti přizpůsobit | Velmi mírná bolest         | <input type="checkbox"/> | Velmi lehká, sotva znatelná bolest                                          |
|                                                                      | Nepřijemná bolest          | <input type="checkbox"/> | Menší bolest, lze ji přirovat k lehkému žitpání                             |
|                                                                      | Přijatelná bolest          | <input type="checkbox"/> | Velmi nápadná bolest podobající se píchnutí injekce                         |
| <b>MÍRNÁ BOLEST</b><br>Neslučitelná s mnoha aktivitami               | Zneklidňující bolest       | <input type="checkbox"/> | Silná, hluboká bolest                                                       |
|                                                                      | Velmi zneklidňující bolest | <input type="checkbox"/> | Silná, hluboká, pronikavá bolest, např. vyvrknutý kotník                    |
|                                                                      | Intenzivní bolest          | <input type="checkbox"/> | Ještě silnější bolest srovnatelná s bodnutím několika včelích žihadel       |
| <b>TĚŽKÁ BOLEST</b><br>Nejste schopni fungovat                       | Velmi intenzivní bolest    | <input type="checkbox"/> | Bolest srovnatelná s průměrnou migrénou                                     |
|                                                                      | Naprostu hrozná bolest     | <input type="checkbox"/> | Bolest srovnatelná s porodem nebo opravou silnou migrénou                   |
|                                                                      | Nesnesitelná bolest        | <input type="checkbox"/> | Bolest nelze ignorovat, vyžaduje léky proti bolesti, nutné navštívit lékaře |

Jak byste posoudil/a Vaši obvyklou míru zrakové pozornosti nebo výdrže při sledování běžného celovečerního filmu?

sleduji bez problémů / sleduji s přestávkami / nemůžu sledovat / nezajímá mne to

S VÍTR UKLONIT P AUBM

Děkujeme Vám za účast v experimentu a při vyplnění dotazníku...

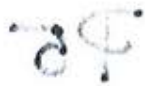

P5

# Informace, dotazník a protokol experimentu pro Bezkontaktní ovládání polohovacího lůžka

řešitel: Ing. Martin Kopeček, MEng, kopecema@lfhk.cuni.cz

Dotazník vyplňte co možná nejdříve po provedení testu.

## Otázky pro instruktora

Experiment proveden dne: 10. 5. 2021

Jméno instruktora: MK

Jméno pacienta: \_\_\_\_\_ Pohlaví: Ž Věk: 54

Číslo logu aplikace: 1, 2, 3

Typ omezení: Paraparéza, Paraplegie, Kvadruplegie, Pentaplegie, Svalové dystrofie, ALS,

Jiné: RS

Popis hybnosti: LEVÁ RUKA PLÉGICKÁ, PRAVÁ RUKA  
HYBNOST DOBRÁ, MECH. VOZÍK

Brýle / kontaktní čočky: JINAK BRÝLE ŽD KROTOČERNOST ano  ne

## Protokol experimentu:

- 1. Kalibrace senzoru
- 2. Vysvětlení principu a umožnění získat zkušenost s ovládáním, alespoň 10 minut
- 3. Uvedení aplikaci do počátečních podmínek – lůžko v bodě nula   
Čas při započítí testování: 13<sup>00</sup>
- 4. Test 1 
  - a) zahájit oční kontakt s aplikací
  - b) zvednout podpěru nohou (po dobu 2-3 s)
  - c) zvednout podpěru hlavy (po dobu 2-3 s)
  - d) snížit podpěru nohou (po dobu 2-3 s)
  - e) snížit podpěru hlavy (po dobu 2-3 s)
  - f) přerušit oční kontakt s aplikací
- 7. Test 2 – opakování Testu 1
- 8. Test 3 – opakování Testu 1   
Čas při ukončení testování: 15<sup>25</sup>

Poznámky instruktora k experimentu:

PL. VOZÍK OBJEDNANÝ  
PROBLÉM S DOLNÍ LÍŠTOU  
PROBLÉM UDRŽENÍ KONCENTRACE



**Otázky pro pacienta**

Získal/a jste jistotu v ovládnání?

ano / spíše ano / nevím / spíše ne / ne

Jak jste spokojen/a s ovládním aplikace?

aktivace ovládní

velmi snadná / snadná / běžná / obtížná / velmi obtížná

způsob volby polohy

velmi snadný / snadný / běžný / obtížný / velmi obtížný

informace o nastavení lůžka

velmi snadné / snadné / běžné / obtížné / velmi obtížné

přehlednost ovládní

velmi přehledné / přehledné / běžné / nepřehledné / velmi nepřehledné

Upřednostnil/a byste ovládní jiným způsobem?

ano / spíše ano / nevím / spíše ne / ne

Pokud ano jakým (např. řeč)?

RUČNĚ, S OPRAVĚNÍM KONTAKT

Máte nějaký poznatek k testu nebo ovládní?

NEZMĚT JAKO DO JE

Jak byste hodnotil/a Vaši aktuální intenzitu bolesti na uvedené obrazové škále?

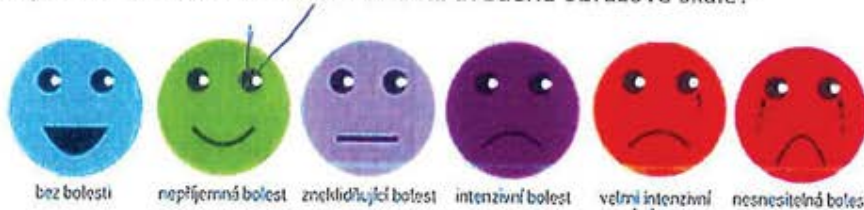

|                                                                      |                            |                                     |                                                                             |
|----------------------------------------------------------------------|----------------------------|-------------------------------------|-----------------------------------------------------------------------------|
| <b>MALÁ NEBO ŽÁDNÁ BOLEST</b><br>Jste schopni se bolesti přizpůsobit | Velmi mírná bolest         | <input checked="" type="checkbox"/> | Velmi lehká, sotva znatelná bolest                                          |
|                                                                      | Nepřijemná bolest          | <input type="checkbox"/>            | Menší bolest, lze ji přirovnat k lehkému žití                               |
|                                                                      | Přijatelná bolest          | <input type="checkbox"/>            | Velmi nápadná bolest podobající se píchnutí injekce                         |
| <b>MÍRNÁ BOLEST</b><br>Neslučitelná s mnoha aktivitami               | Zneklidňující bolest       | <input type="checkbox"/>            | Silná, hluboká bolest                                                       |
|                                                                      | Velmi zneklidňující bolest | <input type="checkbox"/>            | Silná, hluboká, pronikavá bolest, např. vyvrknutý kotník                    |
|                                                                      | Intenzivní bolest          | <input type="checkbox"/>            | Jedná o silnější bolest srovnatelná s bodnutím několika větších žihadel     |
| <b>TĚŽKÁ BOLEST</b><br>Nejste schopni fungovat                       | Velmi intenzivní bolest    | <input type="checkbox"/>            | Bolest srovnatelná s průměrnou migrénou                                     |
|                                                                      | Naprosto hrůzná bolest     | <input type="checkbox"/>            | Bolest srovnatelná s porodem nebo oprávněnou silnou migrénou                |
|                                                                      | Nesnesitelná bolest        | <input type="checkbox"/>            | Bolest nelze ignorovat, vyžaduje léky proti bolesti, nutné navštívit lékaře |

Jak byste posoudil/a Vaši obvyklou míru zrakové pozornosti nebo výdrže při sledování běžného celovečerního filmu?

sleduji bez problémů / sleduji s přestávkami / nemůžu sledovat / nezajímá mne to

Už se odí

Děkujeme Vám za účast v experimentu a při vyplnění dotazníku...

24

P6

## Informace, dotazník a protokol experimentu pro Bezkontaktní ovládání polohovacího lůžka

řešitel: Ing. Martin Kopeček, MEng, kopecema@lfhk.cuni.cz

Dotazník vyplňte co možná nejdříve po provedení testu.

### Otázky pro instruktora

Experiment proveden dne: 10.5.2021

Jméno instruktora: MIL

Jméno pacienta: \_\_\_\_\_ Pohlaví: ž Věk: 70

Číslo logu aplikace: 72,3

Typ omezení: Paraparéza, Paraplegie, Kvadruplegie, Pentaplegie, Svalové dystrofie, ALS,

Jiné: RS

Popis hybnosti: RUČEK, LEVÁ HORNÍ  
RUKA + HLAV. VOZÍK

Brýle / kontaktní čočky: NE  ano  ne

### Protokol experimentu:

1. Kalibrace senzoru
2. Vysvětlení principu a umožnění získat zkušenost s ovládáním, alespoň 10 minut
3. Uvedení aplikaci do počátečních podmínek – lůžko v bodě nula   
Čas při započítí testování: 14:00
4. Test 1 
  - a) zahájit oční kontakt s aplikací
  - b) zvednout podpěru nohou (po dobu 2-3 s)
  - c) zvednout podpěru hlavy (po dobu 2-3 s)
  - d) snížit podpěru nohou (po dobu 2-3 s)
  - e) snížit podpěru hlavy (po dobu 2-3 s)
  - f) přerušit oční kontakt s aplikací
7. Test 2 – opakování Testu 1
8. Test 3 – opakování Testu 1   
Čas při ukončení testování: 14:25

Poznámky instruktora k experimentu:



**Otázky pro pacienta**

Získal/a jste jistotu v ovládnání?

ano / spíše ano / nevím / spíše ne / ne

Jak jste spokojen/a s ovládním aplikace?

- aktivace ovládní velmi snadná / snadná / běžná / obtížná / velmi obtížná
- způsob volby polohy velmi snadný / snadný / běžný / obtížný / velmi obtížný
- informace o nastavení lůžka velmi snadné / snadné / běžné / obtížné / velmi obtížné
- přehlednost ovládní velmi přehledné / přehledné / běžné / nepřehledné / velmi nepřehledné

Upřednostnil/a byste ovládní jiným způsobem?

ano / spíše ano / nevím / spíše ne / ne

Pokud ano jakým (např. řeč)? ..... potenci' ruko ✓

Máte nějaký poznatek k testu nebo ovládní?

Jak byste hodnotil/a Vaši aktuální intenzitu bolesti na uvedené obrazové škále?

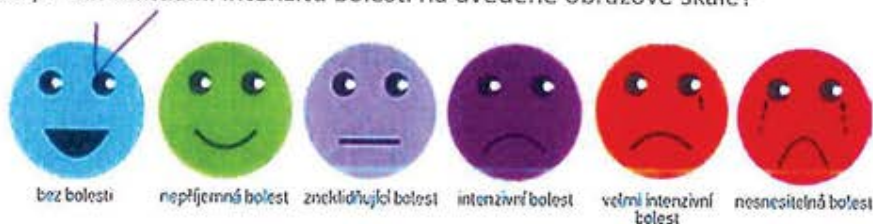

|                                                                      |                            |                          |                                                                             |
|----------------------------------------------------------------------|----------------------------|--------------------------|-----------------------------------------------------------------------------|
| <b>MALÁ NEBO ŽÁDNÁ BOLEST</b><br>Jste schopni se bolesti přizpůsobit | Velmi mírná bolest         | <input type="checkbox"/> | Velmi lehká, sotva znatelná bolest                                          |
|                                                                      | Nepřijemná bolest          | <input type="checkbox"/> | Menší bolest, lze ji přirovnat k lehkému šitpání                            |
|                                                                      | Přijatelná bolest          | <input type="checkbox"/> | Velmi nápadná bolest podobající se píchnutí injekce                         |
| <b>MÍRNÁ BOLEST</b><br>Neslučitelná s mnoha aktivitami               | Zneklidňující bolest       | <input type="checkbox"/> | Silná, hluboká bolest                                                       |
|                                                                      | Velmi zneklidňující bolest | <input type="checkbox"/> | Silná, hluboká, pronikavá bolest, např. vyvrknutý kotník                    |
|                                                                      | Intenzivní bolest          | <input type="checkbox"/> | Ještě silnější bolest srovnatelná s bodnutím několika včelích žihadel       |
| <b>TĚŽKÁ BOLEST</b><br>Nejste schopni fungovat                       | Velmi intenzivní bolest    | <input type="checkbox"/> | Bolest srovnatelná s průměrnou migrénou                                     |
|                                                                      | Naprostě hrzná bolest      | <input type="checkbox"/> | Bolest srovnatelná s porodem nebo opravdu silnou migrénou                   |
|                                                                      | Nesnesitelná bolest        | <input type="checkbox"/> | Bolest nelze ignorovat, vyžaduje léky proti bolesti, nutně navštívit lékaře |

Jak byste posoudil/a Vaši obvyklou míru zrakové pozornosti nebo výdrže při sledování běžného celovečerního filmu?

sleduji bez problémů / sleduji s přestávkami / nemůžu sledovat / nezajímá mne to

Děkujeme Vám za účast v experimentu a při vyplnění dotazníku...



FF

P7

# Informace, dotazník a protokol experimentu pro Bezkontaktní ovládání polohovacího lůžka

řešitel: Ing. Martin Kopeček, MEng, kopece@lfhk.cuni.cz

Dotazník vyplňte co možná nejdříve po provedení testu.

## Otázky pro instruktora

Experiment proveden dne: 11.5.2021

Jméno instruktora: MK

Jméno pacienta: \_\_\_\_\_ Pohlaví: M Věk: 63

Číslo logu aplikace: \_\_\_\_\_ 733

Typ omezení: Paraparéza, Paraplegie, Kvadruplegie, Pentaplegie, Svalové dystrofie, ALS,

Jiné: DS

Popis hybnosti: PLNÁ PARÉZA, POMYB ŽDOLŮ

Brýle / kontaktní čočky: BRÝLE NA DIVADLO ano  ne

## Protokol experimentu:

1. Kalibrace senzoru
2. Vysvětlení principu a umožnění získat zkušenost s ovládáním, alespoň 10 minut
3. Uvedení aplikaci do počátečních podmínek – lůžko v bodě nula   
Čas při započítí testování: 7:30
4. Test 1 
  - a) zahájit oční kontakt s aplikací
  - b) zvednout podpěru nohou (po dobu 2-3 s)
  - c) zvednout podpěru hlavy (po dobu 2-3 s)
  - d) snížit podpěru nohou (po dobu 2-3 s)
  - e) snížit podpěru hlavy (po dobu 2-3 s)
  - f) přerušit oční kontakt s aplikací
7. Test 2 – opakování Testu 1
8. Test 3 – opakování Testu 1   
Čas při ukončení testování: 7:40

Poznámky instruktora k experimentu:

**Otázky pro pacienta**

Získal/a jste jistotu v ovládní?

ano / spíše ano / nevím / spíše ne / ne

Jak jste spokojen/a s ovládním aplikace?

aktivace ovládní

velmi snadná / snadná / běžná / obtížná / velmi obtížná

způsob volby polohy

velmi snadný / snadný / běžný / obtížný / velmi obtížný

informace o nastavení lůžka

velmi snadné / snadné / běžné / obtížné / velmi obtížné

přehlednost ovládní velmi přehledné / přehledné / běžné / nepřehledné / velmi nepřehledné

Upřednostnil/a byste ovládní jiným způsobem?

ano / spíše ano / nevím / spíše ne / ne

Pokud ano jakým (např. řeč)? ..... ŘEČ (MÁ PACIENT DOKA).....

Máte nějaký poznatek k testu nebo ovládní?

TIPATĚŘ MOUTH HOUSE - TV, ZÁSVIČKA,  
FILTRACE SÁZEK, ZVONĚK, VĚTRÁKOV  
- PŘIDAT DO OVLÁDNÍ ŘEČI

Jak byste hodnotil/a Vaši aktuální intenzitu bolesti na uvedené obrazové škále?

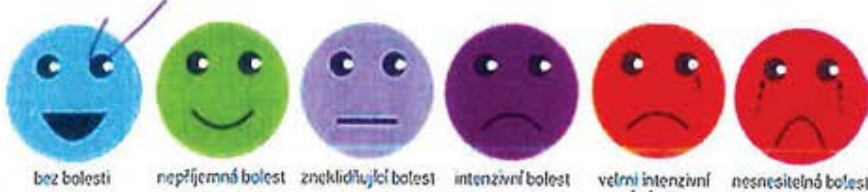

|                                                                      |                            |                          |                                                                             |
|----------------------------------------------------------------------|----------------------------|--------------------------|-----------------------------------------------------------------------------|
| <b>MALÁ NEBO ŽÁDNÁ BOLEST</b><br>Jste schopni se bolesti přizpůsobit | Velmi mírná bolest         | <input type="checkbox"/> | Velmi lehká, sotva znatelná bolest                                          |
|                                                                      | Nepříjemná bolest          | <input type="checkbox"/> | Menší bolest, lze ji přirovnat k lehkému žíjání                             |
|                                                                      | Přijatelná bolest          | <input type="checkbox"/> | Velmi nápadná bolest podobající se píchnutí injekce                         |
| <b>MÍRNÁ BOLEST</b><br>Neslučitelná s mnoha aktivitami               | Zneklidňující bolest       | <input type="checkbox"/> | Silná, hluboká bolest                                                       |
|                                                                      | Velmi zneklidňující bolest | <input type="checkbox"/> | Silná, hluboká, pronikavá bolest, např. vyvrknutý kotník                    |
|                                                                      | Intenzivní bolest          | <input type="checkbox"/> | Ještě silnější bolest srovnatelná s bodnutím několika větrých žihadel       |
| <b>TĚŽKÁ BOLEST</b><br>Nejste schopni fungovat                       | Velmi intenzivní bolest    | <input type="checkbox"/> | Bolest srovnatelná s průměrnou migrénou                                     |
|                                                                      | Naprostá hrozná bolest     | <input type="checkbox"/> | Bolest srovnatelná s porodem nebo opravdu silnou migrénou                   |
|                                                                      | Nesnesitelná bolest        | <input type="checkbox"/> | Bolest nelze ignorovat, vyžaduje léky proti bolesti, nutné navštívit lékaře |

Jak byste posoudil/a Vaši obvyklou míru zrakové pozornosti nebo výdrže při sledování běžného celovečerního filmu?

sleduji bez problémů / sleduji s přestávkami / nemůžu sledovat / nezajímá mne to

Děkujeme Vám za účast v experimentu a při vyplnění dotazníku...



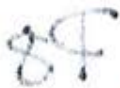

P8

# Informace, dotazník a protokol experimentu pro Bezkontaktní ovládání polohovacího lůžka

řešitel: Ing. Martin Kopeček, MEng, kopecema@lfhk.cuni.cz

Dotazník vyplňte co možná nejdříve po provedení testu.

## Otázky pro instruktora

Experiment proveden dne: 11.5.2021

Jméno instruktora: MK

Jméno pacienta:

Pohlaví: ž

Věk: 64

Číslo logu aplikace: , 2, 3

Typ omezení: Paraparéza, Paraplegie, Kvadruplegie, Pentaplegie, Svalové dystrofie, ALS,

Jiné: RS

Popis hybnosti: PLAVÍ PLÉGIE, NEPOHTA BLIVE' RUCI A  
NOHY

Brýle / kontaktní čočky:

JINAK NA ČTENÍ MUSÍ

ano /  ne

## Protokol experimentu:

1. Kalibrace senzoru
2. Vysvětlení principu a umožnění získat zkušenost s ovládáním, alespoň 10 minut
3. Uvedení aplikaci do počátečních podmínek – lůžko v bodě nula   
Čas při započítí testování: 9:30
4. Test 1 
  - a) zahájit oční kontakt s aplikací
  - b) zvednout podpěru nohou (po dobu 2-3 s)
  - c) zvednout podpěru hlavy (po dobu 2-3 s)
  - d) snížit podpěru nohou (po dobu 2-3 s)
  - e) snížit podpěru hlavy (po dobu 2-3 s)
  - f) přerušit oční kontakt s aplikací
7. Test 2 – opakování Testu 1
8. Test 3 – opakování Testu 1   
Čas při ukončení testování: 9:45

Poznámky instruktora k experimentu:

VELMI DOBRĚ JE ORIENTOVAN, NEPOTŘEBUJE  
KONKRETNÍ CO MÁ DĚLAT. VELMI  
RYCHLE UČEM!



Otázky pro pacienta

Získal/a jste jistotu v ovládní?

ano / spíše ano / nevím / spíše ne / ne

Jak jste spokojen/a s ovládním aplikace?

- aktivace ovládní: velmi snadná / snadná / běžná / obtížná / velmi obtížná
- způsob volby polohy: velmi snadný / snadný / běžný / obtížný / velmi obtížný
- informace o nastavení lůžka: velmi snadné / snadné / běžné / obtížné / velmi obtížné
- přehlednost ovládní: velmi přehledné / přehledné / běžné / nepřehledné / velmi nepřehledné

Upřednostnil/a byste ovládní jiným způsobem?

ano / spíše ano / nevím / spíše ne / ne

Pokud ano jakým (např. řeč)?

ŘEČ NE → SPÍŠE NEVÍM?

Máte nějaký poznatek k testu nebo ovládní?

A FUNGUJE KVŮLI TOMU NEPŘESNĚ

ZPOMBLIT APP, KRABUJE RYCHLE

ADY TO MLUVIL, TAK TO TONĚ NECHUJE, NA RÁDA KLID

Jak byste hodnotil/a Vaši aktuální intenzitu bolesti na uvedené obrazové škále?

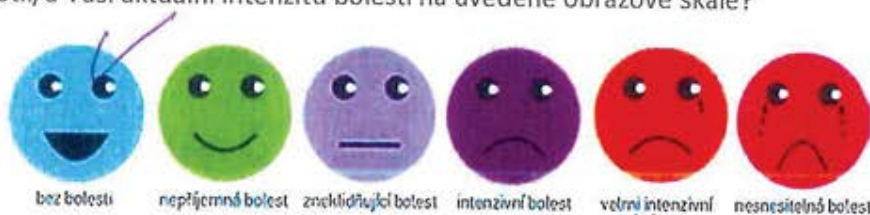

|                                                                      |                            |                          |                                                                             |
|----------------------------------------------------------------------|----------------------------|--------------------------|-----------------------------------------------------------------------------|
| <b>MALÁ NEBO ŽÁDNÁ BOLEST</b><br>Jste schopni se bolesti přizpůsobit | Velmi mírná bolest         | <input type="checkbox"/> | Velmi lehká, sotva znatelná bolest                                          |
|                                                                      | Nepřijemná bolest          | <input type="checkbox"/> | Menší bolest, lze ji přirovnat k lehkému šitpání                            |
|                                                                      | Přijatelná bolest          | <input type="checkbox"/> | Velmi nápadná bolest podobající se píchnutí injekce                         |
| <b>MÍRNÁ BOLEST</b><br>Neslučitelná s mnoha aktivitami               | Zneklidňující bolest       | <input type="checkbox"/> | Silná, hluboká bolest                                                       |
|                                                                      | Velmi zneklidňující bolest | <input type="checkbox"/> | Silná, hluboká, pronikavá bolest, např. vyvrknutý kotník                    |
|                                                                      | Intenzivní bolest          | <input type="checkbox"/> | Jelikož silnější bolest srovnatelná s bodnutím několika včelích žihadel     |
| <b>TĚŽKÁ BOLEST</b><br>Nejste schopni fungovat                       | Velmi intenzivní bolest    | <input type="checkbox"/> | Bolest srovnatelná s průměrnou migrénou                                     |
|                                                                      | Naprostá hrzná bolest      | <input type="checkbox"/> | Bolest srovnatelná s porodem nebo opravou silnou migrénou                   |
|                                                                      | Nesnesitelná bolest        | <input type="checkbox"/> | Bolest nelze ignorovat, vyžaduje léky proti bolesti, nutné navštívit lékaře |

Jak byste posoudil/a Vaši obvyklou míru zrakové pozornosti nebo výdrže při sledování běžného celovečerního filmu?

sleduji bez problémů / sleduji s přestávkami / nemůžu sledovat / nezajímá mne to

Děkujeme Vám za účast v experimentu a při vyplnění dotazníku...

PP

P9

# Informace, dotazník a protokol experimentu pro Bezkontaktní ovládání polohovacího lůžka

řešitel: Ing. Martin Kopeček, MEng, kopecema@lfhk.cuni.cz

Dotazník vyplňte co možná nejdříve po provedení testu.

## Otázky pro instruktora

Experiment proveden dne: 11.5.2021

Jméno instruktora: MIL

Jméno pacienta: \_\_\_\_\_ Pohlaví: M Věk: 64

Číslo logu aplikace: 1, 2, 3

Typ omezení: Paraparéza, Paraplegie, Kvadruplegie, Pentaplegie, Svalové dystrofie, ALS,

Jiné: RS

Popis hybnosti: PLNO PARÉZA, POMYS PAŽÍ A  
NOHOU Ø

Brýle / kontaktní čočky: \_\_\_\_\_ ano /  ne

## Protokol experimentu:

1. Kalibrace senzoru
2. Vysvětlení principu a umožnění získat zkušenost s ovládáním, alespoň 10 minut
3. Uvedení aplikaci do počátečních podmínek – lůžko v bodě nula   
Čas při započetí testování: ..... 70<sup>10</sup> .....
4. Test 1 
  - a) zahájit oční kontakt s aplikací
  - b) zvednout podpěru nohou (po dobu 2-3 s)
  - c) zvednout podpěru hlavy (po dobu 2-3 s)
  - d) snížit podpěru nohou (po dobu 2-3 s)
  - e) snížit podpěru hlavy (po dobu 2-3 s)
  - f) přerušit oční kontakt s aplikací
7. Test 2 – opakování Testu 1
8. Test 3 – opakování Testu 1   
Čas při ukončení testování: ..... 70<sup>30</sup> .....

Poznámky instruktora k experimentu: Pořk nepřesnosti!



**Otázky pro pacienta**

Získal/a jste jistotu v ovládní? *ano / spíše ano / nevím / spíše ne / ne*

Jak jste spokojen/a s ovládním aplikace?

- aktivace ovládní *velmi snadná / snadná / běžná / obtížná / velmi obtížná*
- způsob volby polohy *velmi snadný / snadný / běžný / obtížný / velmi obtížný*
- informace o nastavení lůžka *velmi snadné / snadné / běžné / obtížné / velmi obtížné*
- přehlednost ovládní *velmi přehledné / přehledné / běžné / nepřehledné / velmi nepřehledné*

Upřednostnil/a byste ovládní jiným způsobem? *ano / spíše ano / nevím / spíše ne / ne*

*Pokud ano jakým (např. řeč)? .....*

Máte nějaký poznatek k testu nebo ovládní? *BYLO BY TO VELMI Vhodné*

Jak byste hodnotil/a Vaši aktuální intenzitu bolesti na uvedené obrazové škále?

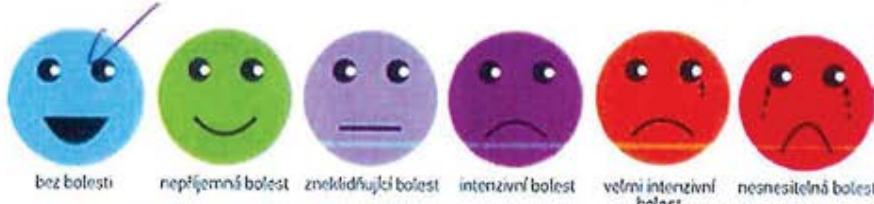

|                                                                      |                            |                          |                                                                             |
|----------------------------------------------------------------------|----------------------------|--------------------------|-----------------------------------------------------------------------------|
| <b>MALÁ NEBO ŽÁDNÁ BOLEST</b><br>Jste schopni se bolesti přizpůsobit | Velmi mírná bolest         | <input type="checkbox"/> | Velmi lehká, sotva znatelná bolest                                          |
|                                                                      | Nepřijemná bolest          | <input type="checkbox"/> | Menší bolest, lze ji přirovnat k lehkému šitíání                            |
|                                                                      | Přijatelná bolest          | <input type="checkbox"/> | Velmi nápadná bolest podobající se píchnutí injekce                         |
| <b>MÍRNÁ BOLEST</b><br>Neslučitelná s mnoha aktivitami               | Zneklidňující bolest       | <input type="checkbox"/> | Silná, hluboká bolest                                                       |
|                                                                      | Velmi zneklidňující bolest | <input type="checkbox"/> | Silná, hluboká, pronikavá bolest, např. vyvrknutý kotník                    |
|                                                                      | Intenzivní bolest          | <input type="checkbox"/> | Ještě silnější bolest srovnatelná s bodnutím několika včelích žihadel       |
| <b>TĚŽKÁ BOLEST</b><br>Nejste schopni fungovat                       | Velmi intenzivní bolest    | <input type="checkbox"/> | Bolest srovnatelná s průměrnou migrénou                                     |
|                                                                      | Naprostá hrozná bolest     | <input type="checkbox"/> | Bolest srovnatelná s porodem nebo opravdu silnou migrénou                   |
|                                                                      | Nesnesitelná bolest        | <input type="checkbox"/> | Bolest nelze ignorovat, vyžaduje léky proti bolesti, rutně navštívit lékaře |

Jak byste posoudil/a Vaši obvyklou míru zrakové pozornosti nebo výdrže při sledování běžného celovečerního filmu?

*sleduji bez problémů / sleduji s přestávkami / nemůžu sledovat / nezajímá mne to*

Děkujeme Vám za účast v experimentu a při vyplnění dotazníku...



014

# Informace, dotazník a protokol experimentu pro Bezkontaktní ovládání polohovacího lůžka

P10

řešitel: Ing. Martin Kopeček, MEng, kopecema@lfhk.cuni.cz

Dotazník vyplňte co možná nejdříve po provedení testu.

## Otázky pro instruktora

Experiment proveden dne: 11.5.2021

Jméno instruktora: MIL

Jméno pacienta: Pohlaví: Z Věk: 65

Číslo logu aplikace: 1,2,3

Typ omezení: Paraparéza, Paraplegie, Kvadruplegie, Pentaplegie, Svalové dystrofie, ALS,

Jiné: 25

Popis hybnosti: PLAV' PARÉZA, RUCI 10/14

Brýle / kontaktní čočky: SPATRA NA DOLU ano /  ne

## Protokol experimentu:

- 1. Kalibrace senzoru
- 2. Vysvětlení principu a umožnění získat zkušenost s ovládáním, alespoň 10 minut
- 3. Uvedení aplikaci do počátečních podmínek – lůžko v bodě nula

Čas při započetí testování: 7:15

- 4. Test 1 
  - a) zahájit oční kontakt s aplikací
  - b) zvednout podpěru nohou (po dobu 2-3 s)
  - c) zvednout podpěru hlavy (po dobu 2-3 s)
  - d) snížit podpěru nohou (po dobu 2-3 s)
  - e) snížit podpěru hlavy (po dobu 2-3 s)
  - f) přerušit oční kontakt s aplikací

7. Test 2 – opakování Testu 1

8. Test 3 – opakování Testu 1

Čas při ukončení testování: 11:40

Poznámky instruktora k experimentu:

**Otázky pro pacienta**

Získal/a jste jistotu v ovládní?

ano / spíše ano / nevím / spíše ne / ne

Jak jste spokojen/a s ovládním aplikace?

- aktivace ovládní velmi snadná / snadná / běžná / obtížná / velmi obtížná
- způsob volby polohy velmi snadný / snadný / běžný / obtížný / velmi obtížný
- informace o nastavení lůžka velmi snadné / snadné / běžné / obtížné / velmi obtížné
- přehlednost ovládní velmi přehledné / přehledné / běžné / nepřehledné / velmi nepřehledné

Upřednostnil/a byste ovládní jiným způsobem?

ano / spíše ano / nevím / spíše ne / ne

Pokud ano jakým (např. řeč)? ..... zatož. může kloudek s vřetením sil. pomoci kloudu pomohat

Máte nějaký poznatek k testu nebo ovládní?

při práci potřebovat

že nato dobře vidět, dle od očí by byl prohledat.

Jak byste hodnotil/a Vaši aktuální intenzitu bolesti na uvedené obrazové škále?

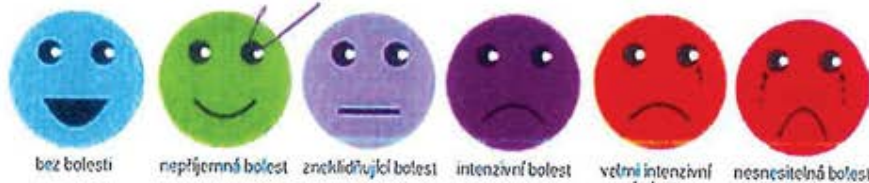

|                                                                      |                            |                                     |                                                                             |
|----------------------------------------------------------------------|----------------------------|-------------------------------------|-----------------------------------------------------------------------------|
| <b>MALÁ NEBO ŽÁDNÁ BOLEST</b><br>Jste schopni se bolesti přizpůsobit | Velmi mírná bolest         | <input checked="" type="checkbox"/> | Velmi lehká, sotva zřetelná bolest                                          |
|                                                                      | Nepřjemná bolest           | <input type="checkbox"/>            | Menší bolest, lze ji přirovnat k lehkému žitpání                            |
|                                                                      | Přijatelná bolest          | <input type="checkbox"/>            | Velmi nápadná bolest podobající se píchnutí injekce                         |
| <b>MÍRNÁ BOLEST</b><br>Nesložitelná s mnoha aktivitami               | Zneklidňující bolest       | <input type="checkbox"/>            | Silná, hluboká bolest                                                       |
|                                                                      | Velmi zneklidňující bolest | <input type="checkbox"/>            | Silná, hluboká, pronikavá bolest, např. vyvrknutý kotník                    |
|                                                                      | Intenzivní bolest          | <input type="checkbox"/>            | Ještě silnější bolest srovnatelná s bodnutím několika včelích žihadel       |
| <b>TĚŽKÁ BOLEST</b><br>Nejste schopni fungovat                       | Velmi intenzivní bolest    | <input type="checkbox"/>            | Bolest srovnatelná s průměrnou migrénou                                     |
|                                                                      | Naprostá hrzná bolest      | <input type="checkbox"/>            | Bolest srovnatelná s porodem nebo opravdu silnou migrénou                   |
|                                                                      | Nesnesitelná bolest        | <input type="checkbox"/>            | Bolest nelze ignorovat, vyžaduje léky proti bolesti, nutně navštívít lékaře |

Jak byste posoudil/a Vaši obvyklou míru zrakové pozornosti nebo výdrže při sledování běžného celovečerního filmu?

sleduji bez problémů / sleduji s přestávkami / nemůžu sledovat / nezajímá mne to

Děkujeme Vám za účast v experimentu a při vyplnění dotazníku...



MP

# Informace, dotazník a protokol experimentu pro Bezkontaktní ovládání polohovacího lůžka

řešitel: Ing. Martin Kopeček, MEng, kopecema@lfhk.cuni.cz

MĚŘENÍ NEPROVEDENO

P11

Dotazník vyplňte co možná nejdříve po provedení testu.

## Otázky pro instruktora

Experiment proveden dne: 11.5.2021

Jméno instruktora: MK

Jméno pacienta: Pohlaví: Ž Věk: 43

Číslo logu aplikace: 733

Typ omezení: Paraparéza, Paraplegie, Kvadruplegie, Pentaplegie, Svalové dystrofie, ALS,

Jiné: RS

Popis hybnosti: PLAVÍ PRŮBĚH, RUCI + NOHY

ŠPATNÝ ZRAK

Brýle / kontaktní čočky: BRÝLE ANO ano /  ne

## Protokol experimentu:

- 1. Kalibrace senzoru  X
- 2. Vysvětlení principu a umožnění získat zkušenost s ovládáním, alespoň 10 minut
- 3. Uvedení aplikaci do počátečních podmínek – lůžko v bodě nula   
Čas při započítí testování: .....
- 4. Test 1 
  - a) zahájit oční kontakt s aplikací
  - b) zvednout podpěru nohou (po dobu 2-3 s)
  - c) zvednout podpěru hlavy (po dobu 2-3 s)
  - d) snížit podpěru nohou (po dobu 2-3 s)
  - e) snížit podpěru hlavy (po dobu 2-3 s)
  - f) přerušit oční kontakt s aplikací
- 7. Test 2 – opakování Testu 1
- 8. Test 3 – opakování Testu 1   
Čas při ukončení testování: .....

Poznámky instruktora k experimentu:

ASTIGMATISMUS + TUTOŽRÁKOST  
 MŮŽE NEKALIBROVAT  
 MOC ÚZKÁ OČNÍ ŠTĚRBINA  
 SEKUND. PROGRES. RS



**Otázky pro pacienta**

Získal/a jste jistotu v ovládnání? *ano / spíše ano/ nevím / spíše ne / ne*

Jak jste spokojen/a s ovládnáním aplikace?

- aktivace ovládnání *velmi snadná / snadná / běžná / obtížná / velmi obtížná*
- způsob volby polohy *velmi snadný / snadný / běžný / obtížný / velmi obtížný*
- informace o nastavení lůžka *velmi snadné / snadné / běžné / obtížné / velmi obtížné*
- přehlednost ovládnání *velmi přehledné / přehledné/ běžné / nepřehledné/ velmi nepřehledné*

Upřednostnil/a byste ovládnání jiným způsobem? *ano / spíše ano/ nevím / spíše ne / ne*

Pokud ano jakým (např. řeč)? ..... *DOMA KZ FUNKCE TOBI* .....

Máte nějaký poznatek k testu nebo ovládnání?

Jak byste hodnotil/a Vaši aktuální intenzitu bolesti na uvedené obrazové škále?

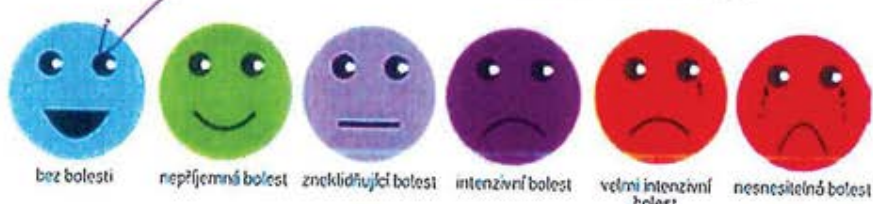

|                                                                      |                            |                          |                                                                             |
|----------------------------------------------------------------------|----------------------------|--------------------------|-----------------------------------------------------------------------------|
| <b>MALÁ NEBO ŽÁDNÁ BOLEST</b><br>Jste schopni se bolesti přizpůsobit | Velmi mírná bolest         | <input type="checkbox"/> | Velmi lehká, sotva znatelná bolest                                          |
|                                                                      | Nepřijemná bolest          | <input type="checkbox"/> | Menší bolest, lze ji přirovnat k lehkému šitpání                            |
|                                                                      | Přijatelná bolest          | <input type="checkbox"/> | Velmi nápadná bolest podobající se píchnutí injekce                         |
| <b>MÍRNÁ BOLEST</b><br>Neslučitelná s mnoha aktivitami               | Zneklidňující bolest       | <input type="checkbox"/> | Silná, hluboká bolest                                                       |
|                                                                      | Velmi zneklidňující bolest | <input type="checkbox"/> | Silná, hluboká, pronikavá bolest, např. vyvrknuty kotník                    |
|                                                                      | Intenzivní bolest          | <input type="checkbox"/> | Ještě silnější bolest srovnatelná s bodnutím několika včelích žihadel       |
| <b>TĚŽKÁ BOLEST</b><br>Nejste schopni fungovat                       | Velmi intenzivní bolest    | <input type="checkbox"/> | Bolest srovnatelná s průměrnou migrénou                                     |
|                                                                      | Náprsto hrzná bolest       | <input type="checkbox"/> | Bolest srovnatelná s porodem nebo operací silnou migrénou                   |
|                                                                      | Nesnesitelná bolest        | <input type="checkbox"/> | Bolest nelze ignorovat, vyžaduje léky proti bolesti, nutné navštívit lékaře |

Jak byste posoudil/a Vaši obvyklou míru zrakové pozornosti nebo výdrže při sledování běžného celovečerního filmu?

*sleduji bez problémů / sleduji s přestávkami / nemůžu sledovat / nezajímá mne to*

Děkujeme Vám za účast v experimentu a při vyplnění dotazníku...

# Informace, dotazník a protokol experimentu pro Bezkontaktní ovládání polohovacího lůžka

řešitel: Ing. Martin Kopeček, MEng, kopecema@lfhk.cuni.cz

P12

Dotazník vyplňte co možná nejdříve po provedení testu.

## Otázky pro instruktora

Experiment proveden dne: 11.5.2021

Jméno instruktora: MK

Jméno pacienta:

Pohlaví: ž

Věk: 47

Číslo logu aplikace:

72,3

Typ omezení: Paraparéza, Paraplegie, Kvadruplegie, Pentaplegie, Svalové dystrofie, ALS,

Jiné: RS

Popis hybnosti:

ČÁSTĚ OMEZENÝ POHYB RUKOU, DLE SLOBY  
STISIL; PŘI KEMOCI POHYB Ø

Brýle / kontaktní čočky:

ano / ne

## Protokol experimentu:

1. Kalibrace senzoru
2. Vysvětlení principu a umožnění získat zkušenost s ovládáním, alespoň 10 minut
3. Uvedení aplikací do počátečních podmínek – lůžko v bodě nula

Čas při započítání testování: 14:05

### 4. Test 1

- a) zahájit oční kontakt s aplikací
- b) zvednout podpěru nohou (po dobu 2-3 s)
- c) zvednout podpěru hlavy (po dobu 2-3 s)
- d) snížit podpěru nohou (po dobu 2-3 s)
- e) snížit podpěru hlavy (po dobu 2-3 s)
- f) přerušit oční kontakt s aplikací

### 7. Test 2 – opakování Testu 1

### 8. Test 3 – opakování Testu 1

Čas při ukončení testování: 14:17

Poznámky instruktora k experimentu:

VÝPOČET ORIBITUR



Otázky pro pacienta

Získal/a jste jistotu v ovládnání? ano / spíše ano / nevím / spíše ne / ne

Jak jste spokojen/a s ovládním aplikace?

- aktivace ovládní velmi snadná / snadná / běžná / obtížná / velmi obtížná
- způsob volby polohy velmi snadný / snadný / běžný / obtížný / velmi obtížný
- informace o nastavení lůžka velmi snadné / snadné / běžné / obtížné / velmi obtížné
- přehlednost ovládní velmi přehledné / přehledné / běžné / nepřehledné / velmi nepřehledné

Upřednostnil/a byste ovládní jiným způsobem? ano / spíše ano / nevím / spíše ne / ne

Pokud ano jakým (např. řeč)? ..... POPNOLÍ ZUKOU KDS BY TO ŠLO

Máte nějaký poznatek k testu nebo ovládní? HLASOVĚ, ALŽ JE ZDĚ

OMĚZENÍ ŘEČÍ  
V TĚTO FOCCE NEPODLEŠÍ OBLMA

Jak byste hodnotil/a Vaši aktuální intenzitu bolesti na uvedené obrazové škále?

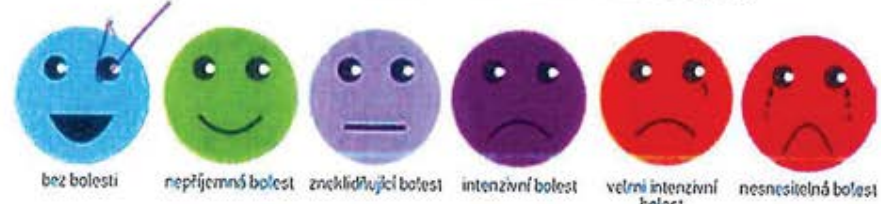

|                                                                      |                            |                          |                                                                             |
|----------------------------------------------------------------------|----------------------------|--------------------------|-----------------------------------------------------------------------------|
| <b>MALÁ NEBO ŽÁDNÁ BOLEST</b><br>Jste schopni se bolesti přizpůsobit | Velmi mírná bolest         | <input type="checkbox"/> | Velmi lehká, sotva znatelná bolest                                          |
|                                                                      | Nepříjemná bolest          | <input type="checkbox"/> | Menší bolest, lze ji přirovnat k lehkému šípání                             |
|                                                                      | Přijatelná bolest          | <input type="checkbox"/> | Velmi nápadná bolest podobající se píchnutí injekce                         |
| <b>MÍRNÁ BOLEST</b><br>Neslučitelná s mnoha aktivitami               | Zneklidňující bolest       | <input type="checkbox"/> | Silná, hluboká bolest                                                       |
|                                                                      | Velmi zneklidňující bolest | <input type="checkbox"/> | Silná, hluboká, pronikavá bolest, např. vyvrknutý kotník                    |
|                                                                      | Intenzivní bolest          | <input type="checkbox"/> | Ještě silnější bolest srovnatelná s bodnutím několika včelích žihadel       |
| <b>TĚŽKÁ BOLEST</b><br>Nejste schopni fungovat                       | Velmi intenzivní bolest    | <input type="checkbox"/> | Bolest srovnatelná s průměrnou migrénou                                     |
|                                                                      | Naprostě hrozná bolest     | <input type="checkbox"/> | Bolest srovnatelná s porodem nebo opravdu silnou migrénou                   |
|                                                                      | Nesnesitelná bolest        | <input type="checkbox"/> | Bolest nelze ignorovat, vyžaduje léky proti bolesti, nutně navštívit lékaře |

Jak byste posoudil/a Vaši obvyklou míru zrakové pozornosti nebo výdrže při sledování běžného celovečerního filmu?

sleduji bez problémů / sleduji s přestávkami / nemůžu sledovat / nezajímá mne to

Děkujeme Vám za účast v experimentu a při vyplnění dotazníku...



819

P13

## Informace, dotazník a protokol experimentu pro Bezkontaktní ovládání polohovacího lůžka

řešitel: Ing. Martin Kopeček, MEng, kopecema@lfhk.cuni.cz

Dotazník vyplňte co možná nejdříve po provedení testu.

### Otázky pro instruktora

Experiment proveden dne: 12.5.21

Jméno instruktora: MK

Jméno pacienta: \_\_\_\_\_ Pohlaví: muž Věk: 63

Číslo logu aplikace: 143

Typ omezení: Paraparéza, Paraplegie, Kvadruplegie, Pentaplegie, Svalové dystrofie, ALS, RS

Jiné: RS

Popis hybnosti: DK plegie, HK část motor, slabý uchop - melze  
stř. tláčko

Brýle / kontaktní čočky: brýle jím čtem ano  ne

### Protokol experimentu:

1. Kalibrace senzoru
2. Vysvětlení principu a umožnění získat zkušenost s ovládáním, alespoň 10 minut
3. Uvedení aplikaci do počátečních podmínek – lůžko v bodě nula   
Čas při započítí testování: 8,25
4. Test 1 
  - a) zahájit oční kontakt s aplikací
  - b) zvednout podpěru nohou (po dobu 2-3 s)
  - c) zvednout podpěru hlavy (po dobu 2-3 s)
  - d) snížit podpěru nohou (po dobu 2-3 s)
  - e) snížit podpěru hlavy (po dobu 2-3 s)
  - f) přerušit oční kontakt s aplikací
7. Test 2 – opakování Testu 1
8. Test 3 – opakování Testu 1   
Čas při ukončení testování: 8,35

Poznámky instruktora k experimentu:

( strabismus V. Hrabec k. 58  
LO měl jako P - ale musel

**Otázky pro pacienta**

Získal/a jste jistotu v ovládní?

*ano* / spíše ano / nevím / spíše ne / ne

Jak jste spokojen/a s ovládním aplikace?

aktivace ovládní *velmi snadná* / snadná / běžná / obtížná / velmi obtížná

způsob volby polohy *velmi snadný* / snadný / běžný / obtížný / velmi obtížný

informace o nastavení lůžka *velmi snadné* / snadné / běžné / obtížné / velmi obtížné

přehlednost ovládní *velmi přehledné* / přehledné / běžné / nepřehledné / velmi nepřehledné

Upřednostnil/a byste ovládní jiným způsobem?

*ne* / spíše ano / nevím / spíše ne / ano

Pokud ano jakým (např. řeč)? .....

Máte nějaký poznatek k testu nebo ovládní?

*Pam byl velmi spokojen s vyovněním, přešel na a rozumí*

Jak byste hodnotil/a Vaši aktuální intenzitu bolesti na uvedené obrazové škále?

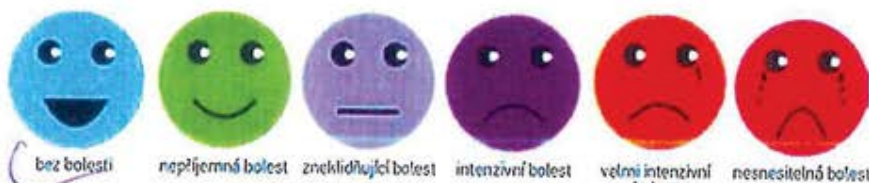

|                                                                      |                            |                          |                                                                             |
|----------------------------------------------------------------------|----------------------------|--------------------------|-----------------------------------------------------------------------------|
| <b>MALÁ NEBO ŽÁDNÁ BOLEST</b><br>Jste schopni se bolesti přizpůsobit | Velmi mírná bolest         | <input type="checkbox"/> | Velmi lehká, sotva znatelná bolest                                          |
|                                                                      | Nepřjemná bolest           | <input type="checkbox"/> | Menší bolest, lze ji přirovnat k lehkému žilpání                            |
|                                                                      | Přijatelná bolest          | <input type="checkbox"/> | Velmi nápadná bolest podobající se píchnutí injekce                         |
| <b>MÍRNÁ BOLEST</b><br>Neslučitelná s mnoha aktivitami               | Zneklidňující bolest       | <input type="checkbox"/> | Silná, hluboká bolest                                                       |
|                                                                      | Velmi zneklidňující bolest | <input type="checkbox"/> | Silná, hluboká, pronikavá bolest, např. vyvrknutý kotník                    |
|                                                                      | Intenzivní bolest          | <input type="checkbox"/> | Ještě silnější bolest srovnatelná s bodnutím několika včelích žihadel       |
| <b>TĚŽKÁ BOLEST</b><br>Nejste schopni fungovat                       | Velmi intenzivní bolest    | <input type="checkbox"/> | Bolest srovnatelná s průměrnou migrénou                                     |
|                                                                      | Naprosto hrůzná bolest     | <input type="checkbox"/> | Bolest srovnatelná s porodem nebo opravdu silnou migrénou                   |
|                                                                      | Nesnesitelná bolest        | <input type="checkbox"/> | Bolest nelze ignorovat, vyžaduje léky proti bolesti, nutně navštívit lékaře |

Jak byste posoudil/a Vaši obvyklou míru zrakové pozornosti nebo výdrže při sledování běžného celovečerního filmu?

*sleduji bez problémů* / sleduji s přestávkami / nemůžu sledovat / nezajímá mne to

Děkujeme Vám za účast v experimentu a při vyplnění dotazníku...



414

P14

# Informace, dotazník a protokol experimentu pro Bezkontaktní ovládání polohovacího lůžka

řešitel: Ing. Martin Kopeček, MEng, kopecema@lfhk.cuni.cz

Dotazník vyplňte co možná nejdříve po provedení testu.

## Otázky pro instruktora

Experiment proveden dne: 12.5.2021

Jméno instruktora: MK

Jméno pacienta: Pohlaví: žena Věk: 60

Číslo logu aplikace: 213

Typ omezení: Paraparéza, Paraplegie, Kvadruplegie, Pentaplegie, Svalové dystrofie, ALS,

Jiné: RS operace míchy - nádor lodižka, částec' ochrnutí

Popis hybnosti: částec' odru, stisk rukou odruj, DK - plug.

Brýle / kontaktní čočky: čtení, ano /ne

## Protokol experimentu:

- 1. Kalibrace senzoru
- 2. Vysvětlení principu a umožnění získat zkušenost s ovládáním, alespoň 10 minut
- 3. Uvedení aplikaci do počátečních podmínek – lůžko v bodě nula   
Čas při započítí testování: 940
- 4. Test 1 
  - a) zahájit oční kontakt s aplikací
  - b) zvednout podpěru nohou (po dobu 2-3 s)
  - c) zvednout podpěru hlavy (po dobu 2-3 s)
  - d) snížit podpěru nohou (po dobu 2-3 s)
  - e) snížit podpěru hlavy (po dobu 2-3 s)
  - f) přerušit oční kontakt s aplikací
- 7. Test 2 – opakování Testu 1
- 8. Test 3 – opakování Testu 1   
Čas při ukončení testování: 955

Poznámky instruktora k experimentu:

Otázky pro pacienta

Získal/a jste jistotu v ovládnání? ano / spíše ano / nevím / spíše ne / ne

Jak jste spokojen/a s ovládním aplikace?

- aktivace ovládní: velmi snadná / snadná / běžná / obtížná / velmi obtížná
- způsob volby polohy: velmi snadný / snadný / běžný / obtížný / velmi obtížný
- informace o nastavení lůžka: velmi snadné / snadné / běžné / obtížné / velmi obtížné
- přehlednost ovládní: velmi přehledné / přehledné / běžné / nepřehledné / velmi nepřehledné

Upřednostnil/a byste ovládní jiným způsobem? ano / spíše ano / nevím / spíše ne / ne

Pokud ano jakým (např. řeč)? radším upřednostním ovl. řečové

Máte nějaký poznatek k testu nebo ovládní?

Ne nepotřebuji

Jak byste hodnotil/a Vaši aktuální intenzitu bolesti na uvedené obrazové škále?

*duševní nepohoda (rodinní duševy)*

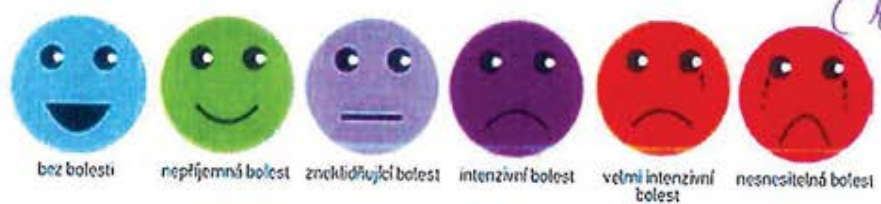

|                                                                      |                            |                          |                                                                             |
|----------------------------------------------------------------------|----------------------------|--------------------------|-----------------------------------------------------------------------------|
| <b>MALÁ NEBO ŽÁDNÁ BOLEST</b><br>Jste schopni se bolesti přizpůsobit | Velmi mírná bolest         | <input type="checkbox"/> | Velmi lehká, sotva znatelná bolest                                          |
|                                                                      | Nepřijemná bolest          | <input type="checkbox"/> | Menší bolest, lze ji přirovnat k lehkému žitíání                            |
|                                                                      | Přijatelná bolest          | <input type="checkbox"/> | Velmi nápadná bolest podobající se píchnutí injekce                         |
| <b>MÍRNÁ BOLEST</b><br>Neslučitelná s mnoha aktivitami               | Zneklidňující bolest       | <input type="checkbox"/> | Silná, hluboká bolest                                                       |
|                                                                      | Velmi zneklidňující bolest | <input type="checkbox"/> | Silná, hluboká, pronikavá bolest, např. vyvrknutý kotník                    |
|                                                                      | Intenzivní bolest          | <input type="checkbox"/> | Ještě silnější bolest srovnatelná s bodnutím několika včelích žihadel       |
| <b>TĚŽKÁ BOLEST</b><br>Nejste schopni fungovat                       | Velmi intenzivní bolest    | <input type="checkbox"/> | Bolest srovnatelná s průměrnou migrénou                                     |
|                                                                      | Naprostá hrzná bolest      | <input type="checkbox"/> | Bolest srovnatelná s porodem nebo oprnědu silnou migrénou                   |
|                                                                      | Nesnesitelná bolest        | <input type="checkbox"/> | Bolest nelze ignorovat, vyžaduje léky proti bolesti, nutně navštívit lékaře |

Jak byste posoudil/a Vaši obvyklou míru zrakové pozornosti nebo výdrže při sledování běžného celovečerního filmu?

sleduji bez problémů / sleduji s přestávkami / nemůžu sledovat / nezajímá mne to

Děkujeme Vám za účast v experimentu a při vyplnění dotazníku...



## Informace, dotazník a protokol experimentu pro Bezkontaktní ovládání polohovacího lůžka

řešitel: Ing. Martin Kopeček, MEng, kopecema@lfhk.cuni.cz

Dotazník vyplňte co možná nejdříve po provedení testu.

### Otázky pro instruktora

Experiment proveden dne: 12.5.2021

Jméno instruktora: MK

Jméno pacienta: \_\_\_\_\_ Pohlaví: muž Věk: 42

Číslo logu aplikace: \_\_\_\_\_, 3

Typ omezení: Paraparéza, Paraplegie, Kvadruplegie, Pentaplegie, Svalové dystrofie, ALS,

Jiné: RS

Popis hybnosti: PHK dvojb. ohybnost - mlouvy' strise, plogie  
pnogus

Brýle / kontaktní čočky: ne ano  ne

### Protokol experimentu:

1. Kalibrace senzoru
2. Vysvětlení principu a umožnění získat zkušenost s ovládáním, alespoň 10 minut
3. Uvedení aplikaci do počátečních podmínek – lůžko v bodě nula   
Čas při započetí testování: 10:22

#### 4. Test 1

- a) zahájit oční kontakt s aplikací
- b) zvednout podpěru nohou (po dobu 2-3 s)
- c) zvednout podpěru hlavy (po dobu 2-3 s)
- d) snížit podpěru nohou (po dobu 2-3 s)
- e) snížit podpěru hlavy (po dobu 2-3 s)
- f) přerušit oční kontakt s aplikací

#### 7. Test 2 – opakování Testu 1

#### 8. Test 3 – opakování Testu 1

Čas při ukončení testování: 10:28

Poznámky instruktora k experimentu:

**Otázky pro pacienta**

Získal/a jste jistotu v ovládnání?

ano / spíše ano / nevím / spíše ne / ne

Jak jste spokojen/a s ovládním aplikace?

aktivace ovládní

velmi snadná / snadná / běžná / obtížná / velmi obtížná

způsob volby polohy

velmi snadný / snadný / běžný / obtížný / velmi obtížný

informace o nastavení lůžka

velmi snadné / snadné / běžné / obtížné / velmi obtížné

přehlednost ovládní

velmi přehledně / přehledně / běžně / nepřehledně / velmi nepřehledně  
*medlela při správn. užív. oproti reáln. průběhu*

Upřednostnil/a byste ovládní jiným způsobem?

ano / spíše ano / nevím / spíše ne / ne

*Pokud ano jakým (např. řeč)?*

Máte nějaký poznatek k testu nebo ovládní?

*(páci má' už. myš. , právně' oči - je toto muce' oči má' ovládní)*

*velikost i barva segmentů dobrá, barvy nejsou bledé, oči je dobře*

Jak byste hodnotil/a Vaši aktuální intenzitu bolesti na uvedené obrazové škále?

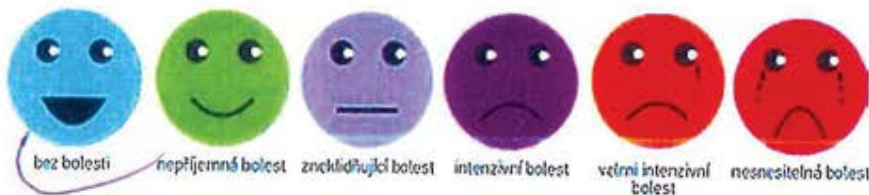

|                                                                      |                            |                          |                                                                           |
|----------------------------------------------------------------------|----------------------------|--------------------------|---------------------------------------------------------------------------|
| <b>MALÁ NEBO ŽÁDNÁ BOLEST</b><br>Jste schopni se bolesti přizpůsobit | Velmi mírná bolest         | <input type="checkbox"/> | Velmi lehká, sotva znatelná bolest                                        |
|                                                                      | Nepříjemná bolest          | <input type="checkbox"/> | Menší bolest, lze ji přirovnat k lehkému žitpání                          |
|                                                                      | Příjemná bolest            | <input type="checkbox"/> | Velmi nápadná bolest podobající se píchnutí injekce                       |
| <b>MÍRNÁ BOLEST</b><br>Neslučitelná s mnoha aktivitami               | Zneklidňující bolest       | <input type="checkbox"/> | Silná, hluboká bolest                                                     |
|                                                                      | Velmi zneklidňující bolest | <input type="checkbox"/> | Silná, hluboká, pronikavá bolest, např. vyvrknutý kotník                  |
|                                                                      | Intenzivní bolest          | <input type="checkbox"/> | Ještě silnější bolest srovnatelná s bodnutím několika včelích žihadel     |
| <b>TĚŽKÁ BOLEST</b><br>Nejste schopni fungovat                       | Velmi intenzivní bolest    | <input type="checkbox"/> | Bolest srovnatelná s průměrnou migrénou                                   |
|                                                                      | Naprostá hrzná bolest      | <input type="checkbox"/> | Bolest srovnatelná s porodem nebo oprvdou silnou migrénou                 |
|                                                                      | Nesnesitelná bolest        | <input type="checkbox"/> | Bolest nelze ignorovat, vyžaduje léky proti bolesti, nutně navštít lékaře |

Jak byste posoudil/a Vaši obvyklou míru zrakové pozornosti nebo výdrže při sledování běžného celovečerního filmu?

sleduji bez problémů / sleduji s přestávkami / nemůžu sledovat / nezajímá mne to

Děkujeme Vám za účast v experimentu a při vyplnění dotazníku...



## Informace, dotazník a protokol experimentu pro Bezkontaktní ovládání polohovacího lůžka

řešitel: Ing. Martin Kopeček, MEng, kopecema@lfhk.cuni.cz

Dotazník vyplňte co možná nejdříve po provedení testu.

### Otázky pro instruktora

Experiment proveden dne: 12.5.2021

Jméno instruktora: MK

Jméno pacienta: \_\_\_\_\_ Pohlaví: muž Věk: 68

Číslo logu aplikace: 113

Typ omezení: Paraparéza, Paraplegie, Kvadruplegie, Pentaplegie, Svalové dystrofie, ALS,

Jiné: RS

Popis hybnosti: PHK - plegie  
medortaleční' stisk, plegie celhona'

Brýle / kontaktní čočky: \_\_\_\_\_ ano  ne

### Protokol experimentu:

1. Kalibrace senzoru
2. Vysvětlení principu a umožnění získat zkušenost s ovládáním, alespoň 10 minut
3. Uvedení aplikaci do počátečních podmínek – lůžko v bodě nula   
Čas při započetí testování: 1300
4. Test 1 
  - a) zahájit oční kontakt s aplikací
  - b) zvednout podpěru nohou (po dobu 2-3 s)
  - c) zvednout podpěru hlavy (po dobu 2-3 s)
  - d) snížit podpěru nohou (po dobu 2-3 s)
  - e) snížit podpěru hlavy (po dobu 2-3 s)
  - f) přerušit oční kontakt s aplikací
7. Test 2 – opakování Testu 1
8. Test 3 – opakování Testu 1   
Čas při ukončení testování: 1305

Poznámky instruktora k experimentu:

**Otázky pro pacienta**

Získal/a jste jistotu v ovládnání? ano / spíše ano / nevím / spíše ne / ne

Jak jste spokojen/a s ovládním aplikace?

- aktivace ovládní velmi snadná / snadná / běžná / obtížná / velmi obtížná
- způsob volby polohy velmi snadný / snadný / běžný / obtížný / velmi obtížný
- informace o nastavení lůžka velmi snadné / snadné / běžné / obtížné / velmi obtížné
- přehlednost ovládní velmi přehledné / přehledné / běžné / nepřehledné / velmi nepřehledné

Upřednostnil/a byste ovládní jiným způsobem? ano / spíše ano / nevím / spíše ne / ne

*Pokud ano jakým (např. řeč)? .....*

Máte nějaký poznatek k testu nebo ovládní?

*Spokojenost s možností nast. regulace  
velikost i barvy správně*

Jak byste hodnotil/a Vaši aktuální intenzitu bolesti na uvedené obrazové škále?

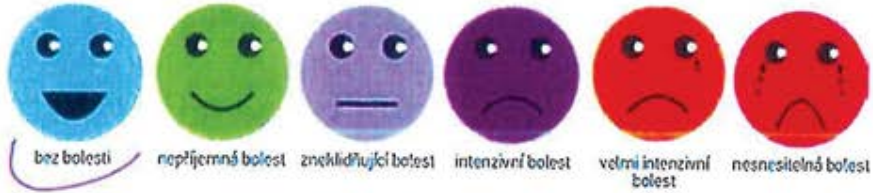

|                                                                      |                            |                          |                                                                             |
|----------------------------------------------------------------------|----------------------------|--------------------------|-----------------------------------------------------------------------------|
| <b>MALÁ NEBO ŽÁDNÁ BOLEST</b><br>Jste schopni se bolesti přizpůsobit | Velmi mírná bolest         | <input type="checkbox"/> | Velmi lehká, sotva znatelná bolest                                          |
|                                                                      | Nepřijemná bolest          | <input type="checkbox"/> | Méně bolest, lze ji přirovnat k lehkému žíplání                             |
|                                                                      | Přijatelná bolest          | <input type="checkbox"/> | Velmi nápadná bolest podobající se píchnutí injekce                         |
| <b>MÍRNÁ BOLEST</b><br>Neslučitelná s mnoha aktivitami               | Zneklidňující bolest       | <input type="checkbox"/> | Silná, hluboká bolest                                                       |
|                                                                      | Velmi zneklidňující bolest | <input type="checkbox"/> | Silná, hluboká, pronikavá bolest, např. vyvrknutý kotník                    |
|                                                                      | Intenzivní bolest          | <input type="checkbox"/> | Ještě silnější bolest srovnatelná s bodnutím několika včelích žihadel       |
| <b>TĚŽKÁ BOLEST</b><br>Nejste schopni fungovat                       | Velmi intenzivní bolest    | <input type="checkbox"/> | Bolest srovnatelná s průměrnou migrénou                                     |
|                                                                      | Naprosto hrůzná bolest     | <input type="checkbox"/> | Bolest srovnatelná s porodem nebo oprahou silnou migrénou                   |
|                                                                      | Nesnesitelná bolest        | <input type="checkbox"/> | Bolest nelze ignorovat, vyžaduje léky proti bolesti, nutné navštívit lékaře |

Jak byste posoudil/a Vaši obvyklou míru zrakové pozornosti nebo výdrže při sledování běžného celovečerního filmu?

sleduji bez problémů / sleduji s přestávkami / nemůžu sledovat / nezajímá mne to

Děkujeme Vám za účast v experimentu a při vyplnění dotazníku...



## Informace, dotazník a protokol experimentu pro Bezkontaktní ovládání polohovacího lůžka

řešitel: Ing. Martin Kopeček, MEng, kopecema@lfhk.cuni.cz

Dotazník vyplňte co možná nejdříve po provedení testu.

### Otázky pro instruktora

Experiment proveden dne: 12. 5. 2021

Jméno instruktora: MK

Jméno pacienta: Pohlaví: žena Věk: 58

Číslo logu aplikace: 1, 2, 3

Typ omezení: Paraparéza, Paraplegie, Kvadruplegie, Pentaplegie, Svalové dystrofie, ALS,

Jiné: RS

Popis hybnosti: *parci zach. hybnost, stib omezen - slab, bez moc. stihne i ka fleci ka*  
*(probihle' operace - ruce, ruce) presna pohyb (ciste' par. pohyb)*

Brýle / kontaktní čočky: *dalekozrakost brizkozrakost,* ano  ne

### Protokol experimentu:

1. Kalibrace senzoru
2. Vysvětlení principu a umožnění získat zkušenost s ovládáním, alespoň 10 minut
3. Uvedení aplikaci do počátečních podmínek – lůžko v bodě nula   
Čas při započítí testování: 14:08
4. Test 1 
  - a) zahájit oční kontakt s aplikací
  - b) zvednout podpěru nohou (po dobu 2-3 s)
  - c) zvednout podpěru hlavy (po dobu 2-3 s)
  - d) snížit podpěru nohou (po dobu 2-3 s)
  - e) snížit podpěru hlavy (po dobu 2-3 s)
  - f) přerušit oční kontakt s aplikací
7. Test 2 – opakování Testu 1
8. Test 3 – opakování Testu 1   
Čas při ukončení testování: 14:15

Poznámky instruktora k experimentu:

## Otázky pro pacienta

P17

Získal/a jste jistotu v ovládní?

ano / spíše ano / nevím / spíše ne / ne

Jak jste spokojen/a s ovládním aplikace?

aktivace ovládní

velmi snadná / snadná / běžná / obtížná / velmi obtížná

způsob volby polohy

velmi snadný / snadný / běžný / obtížný / velmi obtížný

informace o nastavení lůžka

velmi snadné / snadné / běžné / obtížné / velmi obtížné

přehlednost ovládní

velmi přehledné / přehledné / běžné / nepřehledné / velmi nepřehledné

Upřednostnil/a byste ovládní jiným způsobem?

ano / spíše ano / nevím / spíše ne / ne

Pokud ano jakým (např. řeč)? .....

Máte nějaký poznatek k testu nebo ovládní?

*nic bylo v pořádku  
možnost 'ovládání' o další funkce ('rehabilitac') - při obdržení  
lékem, ...*

Jak byste hodnotil/a Vaši aktuální intenzitu bolesti na uvedené obrazové škále?

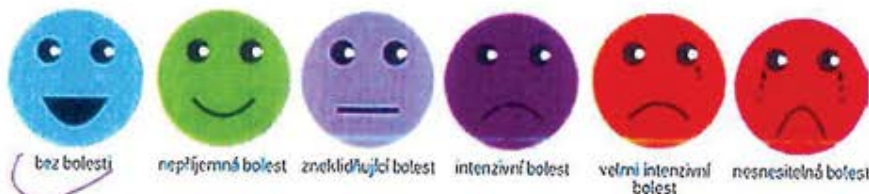

|                                                                      |                            |                          |                                                                             |
|----------------------------------------------------------------------|----------------------------|--------------------------|-----------------------------------------------------------------------------|
| <b>MALÁ NEBO ŽÁDNÁ BOLEST</b><br>Jste schopni se bolesti přizpůsobit | Velmi mírná bolest         | <input type="checkbox"/> | Velmi lehká, sotva zřetelná bolest                                          |
|                                                                      | Nepřijemná bolest          | <input type="checkbox"/> | Menší bolest, lze ji přirovnat k lehkému žíjání                             |
|                                                                      | Přijatelná bolest          | <input type="checkbox"/> | Velmi nápadná bolest podobající se píchnutí injekce                         |
| <b>MÍRNÁ BOLEST</b><br>Neslučitelná s mnoha aktivitami               | Zneklidňující bolest       | <input type="checkbox"/> | Silná, hluboká bolest                                                       |
|                                                                      | Velmi zneklidňující bolest | <input type="checkbox"/> | Silná, hluboká, pronikavá bolest, např. vyvrknutý kotník                    |
|                                                                      | Intenzivní bolest          | <input type="checkbox"/> | Ještě silnější bolest srovnatelná s bodnutím několika včelích žihadel       |
| <b>TĚŽKÁ BOLEST</b><br>Nejste schopni fungovat                       | Velmi intenzivní bolest    | <input type="checkbox"/> | Bolest srovnatelná s průměrnou migrénou                                     |
|                                                                      | Naprostá hrůzná bolest     | <input type="checkbox"/> | Bolest srovnatelná s porodem nebo opravou silnou migrénou                   |
|                                                                      | Nesnesitelná bolest        | <input type="checkbox"/> | Bolest nelze ignorovat, vyžaduje léky proti bolesti, nutně navštívit lékaře |

Jak byste posoudil/a Vaši obvyklou míru zrakové pozornosti nebo výdrže při sledování běžného celovečerního filmu?

sleduji bez problémů / sleduji s přestávkami / nemůžu sledovat / nezajímá mne to

Děkujeme Vám za účast v experimentu a při vyplnění dotazníku...



## Informace, dotazník a protokol experimentu pro Bezkontaktní ovládání polohovacího lůžka

řešitel: Ing. Martin Kopeček, MEng, kopece@lfhk.cuni.cz

Dotazník vyplňte co možná nejdříve po provedení testu.

### Otázky pro instruktora

Experiment proveden dne: 17. 06. 2020

Jméno instruktora: KOPEČEK

Jméno pacienta: \_\_\_\_\_ Pohlaví: ž Věk: 20

Číslo logu aplikace: \_\_\_\_\_

Typ omezení: Paraparéza, Paraplegie, Kvadruplegie, Pentaplegie, Svalové dystrofie, ALS,

Jiné: žádné

Popis hybnosti: řeka

Brýle / kontaktní čočky: ASTIGMAT.  ano /  ne

### Protokol experimentu:

1. Kalibrace senzoru
2. Vysvětlení principu a umožnění získat zkušenost s ovládáním, alespoň 10 minut
3. Uvedení aplikace do počátečních podmínek – lůžko v bodě nula   
Čas při započítí testování: 1345
4. Test 1 
  - a) zahájit oční kontakt s aplikací
  - b) **zvednout** podpěru nohou (po dobu 2-3 s)
  - c) **zvednout** podpěru hlavy (po dobu 2-3 s)
  - d) **snížit** podpěru nohou (po dobu 2-3 s)
  - e) **snížit** podpěru hlavy (po dobu 2-3 s)
  - f) přerušit oční kontakt s aplikací
7. Test 2 – opakování Testu 1
8. Test 3 – opakování Testu 1   
Čas při ukončení testování: 1400

Poznámky instruktora k experimentu:

## Otázky pro pacienta

Získal/a jste jistotu v ovládní?

ano / spíše ano / nevím / spíše ne / ne

Jak jste spokojen/a s ovládním aplikace?

aktivace ovládní

velmi snadná / snadná / běžná / obtížná / velmi obtížná

způsob volby polohy

velmi snadný / snadný / běžný / obtížný / velmi obtížný

informace o nastavení lůžka

velmi snadné / snadné / běžné / obtížné / velmi obtížné

přehlednost ovládní velmi přehledné / přehledné / běžné / nepřehledné / velmi nepřehledné

Upřednostnil/a byste ovládní jiným způsobem?

ano / spíše ano / nevím / spíše ne / ne

Pokud ano jakým (např. řeč)? .....

Máte nějaký poznatek k testu nebo ovládní?

---



---

Jak byste hodnotil/a Vaši aktuální intenzitu bolesti na uvedené obrazové škále?

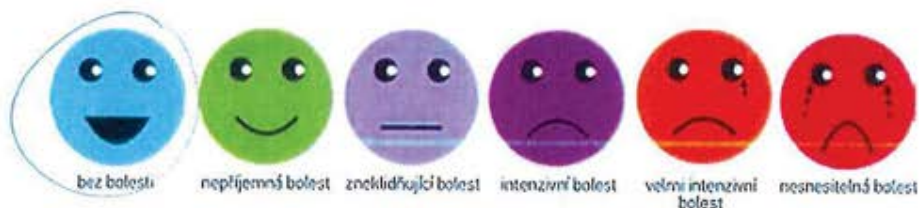

|                                                                      |                            |                          |                                                                             |
|----------------------------------------------------------------------|----------------------------|--------------------------|-----------------------------------------------------------------------------|
| <b>MALÁ NEBO ŽÁDNÁ BOLEST</b><br>Jste schopni se bolesti přizpůsobit | Velmi mírná bolest         | <input type="checkbox"/> | Velmi lehká, sotva znatelná bolest                                          |
|                                                                      | Nepříjemná bolest          | <input type="checkbox"/> | Menší bolest, lze ji přirovnat k lehkému žitpání                            |
|                                                                      | Přijatelná bolest          | <input type="checkbox"/> | Velmi nápadná bolest podobající se píchnutí injekce                         |
| <b>MÍRNÁ BOLEST</b><br>Neslučitelná s mnoha aktivitami               | Zneklidňující bolest       | <input type="checkbox"/> | Silná, hluboká bolest                                                       |
|                                                                      | Velmi zneklidňující bolest | <input type="checkbox"/> | Silná, hluboká, pronikavá bolest, např. vyvrknutý kotník                    |
|                                                                      | Intenzivní bolest          | <input type="checkbox"/> | Ještě silnější bolest srovnatelná s bodnutím několika včelích žihadel       |
| <b>TĚŽKÁ BOLEST</b><br>Nejste schopni fungovat                       | Velmi intenzivní bolest    | <input type="checkbox"/> | Bolest srovnatelná s průměrnou migrénou                                     |
|                                                                      | Naprostu hrozná bolest     | <input type="checkbox"/> | Bolest srovnatelná s porodem nebo opravdu silnou migrénou                   |
|                                                                      | Nesnesitelná bolest        | <input type="checkbox"/> | Bolest nelze ignorovat, vyžaduje léky proti bolesti, nutně navštívit lékaře |

Jak byste posoudil/a Vaši obvyklou míru zrakové pozornosti nebo výdrže při sledování běžného celovečerního filmu?

sleduji bez problémů / sleduji s přestávkami / nemůžu sledovat / nezajímá mne to

Děkujeme Vám za účast v experimentu a při vyplnění dotazníku...



## Informace, dotazník a protokol experimentu pro Bezkontaktní ovládání polohovacího lůžka

řešitel: Ing. Martin Kopeček, MEng, kopecema@lfhk.cuni.cz

Dotazník vyplňte co možná nejdříve po provedení testu.

### Otázky pro instruktora

Experiment proveden dne: 17. 6. 2020

Jméno instruktora: KOPEČEK

Jméno pacienta:

Pohlaví: 2<sup>l</sup>

Věk: 20

Číslo logu aplikace: -

Typ omezení: Paraparéza, Paraplegie, Kvadruplegie, Pentaplegie, Svalové dystrofie, ALS,

Jiné: ZDRAV

Popis hybnosti: FLAP

Brýle / kontaktní čočky:

ano /  ne

### Protokol experimentu:

1. Kalibrace senzoru
2. Vysvětlení principu a umožnění získat zkušenost s ovládáním, alespoň 10 minut
3. Uvedení aplikaci do počátečních podmínek – lůžko v bodě nula

Čas při započetí testování: 12:50

#### 4. Test 1

- a) zahájit oční kontakt s aplikací
- b) zvednout podpěru nohou (po dobu 2-3 s)
- c) zvednout podpěru hlavy (po dobu 2-3 s)
- d) snížit podpěru nohou (po dobu 2-3 s)
- e) snížit podpěru hlavy (po dobu 2-3 s)
- f) přerušit oční kontakt s aplikací

#### 7. Test 2 – opakování Testu 1

#### 8. Test 3 – opakování Testu 1

Čas při ukončení testování: 12:45

Poznámky instruktora k experimentu:

20

CR

### Otázky pro pacienta

Získal/a jste jistotu v ovládní?

ano / spíše ano / nevím / spíše ne / ne

Jak jste spokojen/a s ovládním aplikace?

aktivace ovládní

velmi snadná / snadná / běžná / obtížná / velmi obtížná

způsob volby polohy

velmi snadný / snadný / běžný / obtížný / velmi obtížný

informace o nastavení lůžka

velmi snadné / snadné / běžné / obtížné / velmi obtížné

přehlednost ovládní

velmi přehledné / přehledné / běžné / nepřehledné / velmi nepřehledné

Upřednostnil/a byste ovládní jiným způsobem?

ano / spíše ano / nevím / spíše ne / ne

*Pokud ano jakým (např. řeč)?* .....

Máte nějaký poznatek k testu nebo ovládní?

---

---

Jak byste hodnotil/a Vaši aktuální intenzitu bolesti na uvedené obrazové škále?

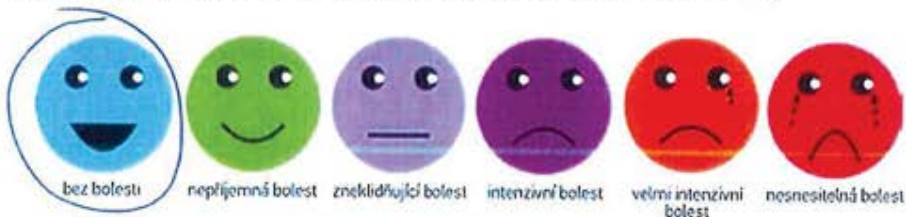

|                                                                      |                            |                          |                                                                             |
|----------------------------------------------------------------------|----------------------------|--------------------------|-----------------------------------------------------------------------------|
| <b>MALÁ NEBO ŽÁDNÁ BOLEST</b><br>Jste schopni se bolesti přizpůsobit | Velmi mírná bolest         | <input type="checkbox"/> | Velmi lehká, sotva znatelná bolest                                          |
|                                                                      | Nepříjemná bolest          | <input type="checkbox"/> | Menší bolest, lze ji přirovnat k lehkému štipání                            |
|                                                                      | Přijatelná bolest          | <input type="checkbox"/> | Velmi nápadná bolest podobající se píchnutí injekce                         |
| <b>MÍRNÁ BOLEST</b><br>Neslučitelná s mnoha aktivitami               | Zneklidňující bolest       | <input type="checkbox"/> | Silná, hluboká bolest                                                       |
|                                                                      | Velmi zneklidňující bolest | <input type="checkbox"/> | Silná, hluboká, pronikavá bolest, např. vyvrknutý kotník                    |
|                                                                      | Intenzivní bolest          | <input type="checkbox"/> | Ještě silnější bolest srovnatelná s bodnutím několika včelích žihadel       |
| <b>TĚŽKÁ BOLEST</b><br>Nejste schopni fungovat                       | Velmi intenzivní bolest    | <input type="checkbox"/> | Bolest srovnatelná s průměrnou migrénou                                     |
|                                                                      | Naprostě hrozná bolest     | <input type="checkbox"/> | Bolest srovnatelná s porodem nebo opravdu silnou migrénou                   |
|                                                                      | Nesnesitelná bolest        | <input type="checkbox"/> | Bolest nelze ignorovat, vyžaduje léky proti bolesti, nutně navštívit lékaře |

Jak byste posoudil/a Vaši obvyklou míru zrakové pozornosti nebo výdrže při sledování běžného celovečerního filmu?

sleduji bez problémů / sleduji s přestávkami / nemůžu sledovat / nezajímá mne to

Děkujeme Vám za účast v experimentu a při vyplnění dotazníku...



## Informace, dotazník a protokol experimentu pro Bezkontaktní ovládání polohovacího lůžka

řešitel: Ing. Martin Kopeček, MEng, kopecema@lfhk.cuni.cz

Dotazník vyplňte co možná nejdříve po provedení testu.

### Otázky pro instruktora

Experiment proveden dne: 10. 6. 2020

Jméno instruktora: KOPEČEK

Jméno pacienta:

Pohlaví: ♂

Věk: 20

Číslo logu aplikace:

Typ omezení: Paraparéza, Paraplegie, Kvadruplegie, Pentaplegie, Svalové dystrofie, ALS,

Jiné:

3DPAE'

Popis hybnosti:

PLA'

Brýle / kontaktní čočky:

ano /  ne

### Protokol experimentu:

1. Kalibrace senzoru
2. Vysvětlení principu a umožnění získat zkušenost s ovládáním, alespoň 10 minut
3. Uvedení aplikaci do počátečních podmínek – lůžko v bodě nula   
 Čas při započetí testování: 15:15
4. Test 1 
  - a) zahájit oční kontakt s aplikací
  - b) zvednout podpěru nohou (po dobu 2-3 s)
  - c) zvednout podpěru hlavy (po dobu 2-3 s)
  - d) snížit podpěru nohou (po dobu 2-3 s)
  - e) snížit podpěru hlavy (po dobu 2-3 s)
  - f) přerušit oční kontakt s aplikací
7. Test 2 – opakování Testu 1
8. Test 3 – opakování Testu 1   
 Čas při ukončení testování: 15:30

Poznámky instruktora k experimentu:

**Otázky pro pacienta**

Získal/a jste jistotu v ovládnání?

ano / spíše ano / nevím / spíše ne / ne

Jak jste spokojen/a s ovládním aplikace?

- aktivace ovládní velmi snadná / snadná / běžná / obtížná / velmi obtížná
- způsob volby polohy velmi snadný / snadný / běžný / obtížný / velmi obtížný
- informace o nastavení lůžka velmi snadné / snadné / běžné / obtížné / velmi obtížné
- přehlednost ovládní velmi přehledné / přehledné / běžné / nepřehledné / velmi nepřehledné

Upřednostnil/a byste ovládní jiným způsobem?

ano / spíše ano / nevím / spíše ne / ne

Pokud ano jakým (např. řeč)? .....

Máte nějaký poznatek k testu nebo ovládní?

---



---

Jak byste hodnotil/a Vaši aktuální intenzitu bolesti na uvedené obrazové škále?

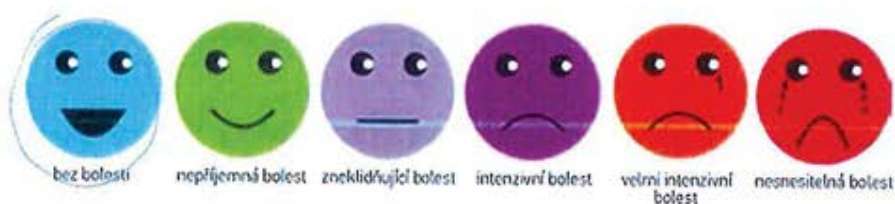

|                                                                      |                            |                          |                                                                             |
|----------------------------------------------------------------------|----------------------------|--------------------------|-----------------------------------------------------------------------------|
| <b>MALÁ NEBO ŽÁDNÁ BOLEST</b><br>Jste schopni se bolesti přizpůsobit | Velmi mírná bolest         | <input type="checkbox"/> | Velmi lehká, sotva ztelná bolest                                            |
|                                                                      | Nepříjemná bolest          | <input type="checkbox"/> | Menší bolest, lze ji přirovnat k lehkému šitpání                            |
|                                                                      | Přijatelná bolest          | <input type="checkbox"/> | Velmi nepodná bolest podobající se píchnutí injekce                         |
| <b>MÍRNÁ BOLEST</b><br>Neslučitelná s mnoha aktivitami               | Zneklidňující bolest       | <input type="checkbox"/> | Silná, hluboká bolest                                                       |
|                                                                      | Velmi zneklidňující bolest | <input type="checkbox"/> | Silná, hluboká, pronikavá bolest, např. vyvrknutý kotník                    |
|                                                                      | Intenzivní bolest          | <input type="checkbox"/> | Ještě silnější bolest srovnatelná s bodnutím několika včelích žihadel       |
| <b>TĚŽKÁ BOLEST</b><br>Nejste schopni fungovat                       | Velmi intenzivní bolest    | <input type="checkbox"/> | Bolest srovnatelná s průměrnou migrénou                                     |
|                                                                      | Naprostu hrozná bolest     | <input type="checkbox"/> | Bolest srovnatelná s porodem nebo opravdu silnou migrénou                   |
|                                                                      | Nesnesitelná bolest        | <input type="checkbox"/> | Bolest nelze ignorovat, vyžaduje léky proti bolesti, nutné navštívit lékaře |

Jak byste posoudil/a Vaši obvyklou míru zrakové pozornosti nebo výdrže při sledování běžného celovečerního filmu?

sleduji bez problémů / sleduji s přestávkami / nemůžu sledovat / nezajímá mne to

Děkujeme Vám za účast v experimentu a při vyplnění dotazníku...



40

C4

## Informace, dotazník a protokol experimentu pro Bezkontaktní ovládání polohovacího lůžka

řešitel: Ing. Martin Kopeček, MEng, kopece@lfhk.cuni.cz

Dotazník vyplňte co možná nejdříve po provedení testu.

### Otázky pro instruktora

Experiment proveden dne: 10. 6. 2020

Jméno instruktora: KOPRČEK

Jméno pacienta: Pohlaví: E Věk: 19

Číslo logu aplikace:

Typ omezení: Paraparéza, Paraplegie, Kvadruplegie, Pentaplegie, Svalové dystrofie, ALS,

Jiné: ZDRAK

Popis hybnosti: PCNA

Brýle / kontaktní čočky: ano /  ne

### Protokol experimentu:

1. Kalibrace senzoru
2. Vysvětlení principu a umožnění získat zkušenost s ovládáním, alespoň 10 minut
3. Uvedení aplikaci do počátečních podmínek – lůžko v bodě nula   
Čas při započítí testování: ..... 13<sup>00</sup> .....
4. Test 1 
  - a) zahájit oční kontakt s aplikací
  - b) zvednout podpěru nohou (po dobu 2-3 s)
  - c) zvednout podpěru hlavy (po dobu 2-3 s)
  - d) snížit podpěru nohou (po dobu 2-3 s)
  - e) snížit podpěru hlavy (po dobu 2-3 s)
  - f) přerušit oční kontakt s aplikací
7. Test 2 – opakování Testu 1
8. Test 3 – opakování Testu 1   
Čas při ukončení testování: ..... 13<sup>10</sup> .....

Poznámky instruktora k experimentu:

**Otázky pro pacienta**

Získal/a jste jistotu v ovládní?

ano / spíše ano / nevím / spíše ne / ne

Jak jste spokojen/a s ovládním aplikace?

aktivace ovládní

velmi snadná / snadná / běžná / obtížná / velmi obtížná

způsob volby polohy

velmi snadný / snadný / běžný / obtížný / velmi obtížný

informace o nastavení lůžka

velmi snadně / snadně / běžně / obtížně / velmi obtížně

přehlednost ovládní

velmi přehledně / přehledně / běžně / nepřehledně / velmi nepřehledně

Upřednostnil/a byste ovládní jiným způsobem?

ano / spíše ano / nevím / spíše ne / ne

Pokud ano jakým (např. řeč)? .....

Máte nějaký poznatek k testu nebo ovládní?

*úžasná metoda, pro lidi kteří nemohou svou polohu nijak jinak ovládat, stačí se takhle se soběstačný v určitých situacích polohy*

Jak byste hodnotil/a Vaši aktuální intenzitu bolesti na uvedené obrazové škále?

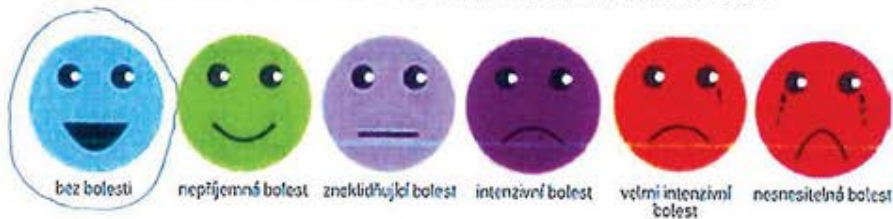

|                                                                      |                            |                          |                                                                             |
|----------------------------------------------------------------------|----------------------------|--------------------------|-----------------------------------------------------------------------------|
| <b>MALÁ NEBO ŽÁDNÁ BOLEST</b><br>Jste schopni se bolesti přizpůsobit | Velmi mírná bolest         | <input type="checkbox"/> | Velmi lehká, sotva znatelná bolest                                          |
|                                                                      | Nepříjemná bolest          | <input type="checkbox"/> | Menší bolest, lze ji přirovnat k lehkému štipání                            |
|                                                                      | Přijatelná bolest          | <input type="checkbox"/> | Velmi nápadná bolest podobající se píchnutí injekce                         |
| <b>MÍRNÁ BOLEST</b><br>Neslužitelná s mnoha aktivitami               | Zneklidňující bolest       | <input type="checkbox"/> | Silná, hluboká bolest                                                       |
|                                                                      | Velmi zneklidňující bolest | <input type="checkbox"/> | Silná, hluboká, pronikavá bolest, např. vyvrknutý kotník                    |
|                                                                      | Intenzivní bolest          | <input type="checkbox"/> | Jedná o silnější bolest srovnatelná s bodnutím několika včelích žihadel     |
| <b>TĚŽKÁ BOLEST</b><br>Nejste schopni fungovat                       | Velmi intenzivní bolest    | <input type="checkbox"/> | Bolest srovnatelná s průměrnou migrénou                                     |
|                                                                      | Náprsto hrůzná bolest      | <input type="checkbox"/> | Bolest srovnatelná s porodem nebo opravdu silnou migrénou                   |
|                                                                      | Nesnesitelná bolest        | <input type="checkbox"/> | Bolest netre ignorovat, vyžaduje léky proti bolesti, nutně navštívit lékaře |

Jak byste posoudil/a Vaši obvyklou míru zrakové pozornosti nebo výdrže při sledování běžného celovečerního filmu?

sleduji bez problémů / sleduji s přestávkami / nemůžu sledovat / nezajímá mne to

Děkujeme Vám za účast v experimentu a při vyplnění dotazníku...



Informace, dotazník a protokol experimentu pro  
**Bezkontaktní ovládání polohovacího lůžka**

řešitel: Ing. Martin Kopeček, MEng, kopecema@lfhk.cuni.cz

Dotazník vyplňte co možná nejdříve po provedení testu.

**Otázky pro instruktora**

Experiment proveden dne: 7. 6. 2020

Jméno instruktora: Kopeček

Jméno pacienta: \_\_\_\_\_

Pohlaví: žena

Věk: 50

Číslo logu aplikace: \_\_\_\_\_

Typ omezení: Paraparéza, Paraplegie, Kvadruplegie, Pentaplegie, Svalové dystrofie, ALS,

Jiné: spondyl

Popis hybnosti: PCND

Brýle / kontaktní čočky: \_\_\_\_\_

+ 3,5 D

ano /  ne

**Protokol experimentu:**

1. Kalibrace senzoru
2. Vysvětlení principu a umožnění získat zkušenost s ovládáním, alespoň 10 minut
3. Uvedení aplikací do počátečních podmínek – lůžko v bodě nula   
Čas při započítí testování: 10<sup>15</sup> .....
4. Test 1 
  - a) zahájit oční kontakt s aplikací
  - b) zvednout podpěru nohou (po dobu 2-3 s)
  - c) zvednout podpěru hlavy (po dobu 2-3 s)
  - d) snížit podpěru nohou (po dobu 2-3 s)
  - e) snížit podpěru hlavy (po dobu 2-3 s)
  - f) přerušit oční kontakt s aplikací
7. Test 2 – opakování Testu 1
8. Test 3 – opakování Testu 1   
Čas při ukončení testování: 10<sup>30</sup> .....

Poznámky instruktora k experimentu:

**Otázky pro pacienta**

Získal/a jste jistotu v ovládnání?

ano / spíše ano / nevím / spíše ne / ne

Jak jste spokojen/a s ovládním aplikace?

- aktivace ovládní velmi snadná / snadná / běžná / obtížná / velmi obtížná
- způsob volby polohy velmi snadný / snadný / běžný / obtížný / velmi obtížný
- informace o nastavení lůžka velmi snadné / snadné / běžné / obtížné / velmi obtížné
- přehlednost ovládní velmi přehledné / přehledné / běžné / nepřehledné / velmi nepřehledné

Upřednostnil/a byste ovládní jiným způsobem?

ano / spíše ano / nevím / spíše ne / ne

Pokud ano jakým (např. řeč)? .....

Máte nějaký poznatek k testu nebo ovládní?

Ukázání očí

Jak byste hodnotil/a Vaši aktuální intenzitu bolesti na uvedené obrazové škále?

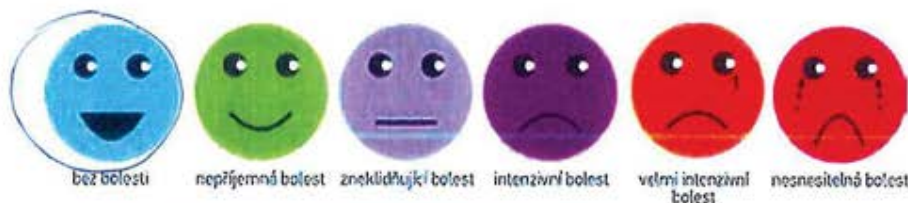

|                                                                      |                            |                          |                                                                             |
|----------------------------------------------------------------------|----------------------------|--------------------------|-----------------------------------------------------------------------------|
| <b>MALÁ NEBO ŽÁDNÁ BOLEST</b><br>Jste schopni se bolesti přizpůsobit | Velmi mírná bolest         | <input type="checkbox"/> | Velmi lehká, sotva znatelná bolest                                          |
|                                                                      | Nepříjemná bolest          | <input type="checkbox"/> | Menší bolest, lze ji přirovnat k lehkému štlpání                            |
|                                                                      | Přijatelná bolest          | <input type="checkbox"/> | Velmi nápadná bolest podobající se píchnutí injekce                         |
| <b>MÍRNÁ BOLEST</b><br>Neslučitelná s mnoha aktivitami               | Zneklidňující bolest       | <input type="checkbox"/> | Silná, hluboká bolest                                                       |
|                                                                      | Velmi zneklidňující bolest | <input type="checkbox"/> | Silná, hluboká, pronikavá bolest, např. vyvrknutý kotník                    |
|                                                                      | Intenzivní bolest          | <input type="checkbox"/> | Ještě silnější bolest srovnatelná s bodnutím několika včelích žihadel       |
| <b>TĚŽKÁ BOLEST</b><br>Nejste schopni fungovat                       | Velmi intenzivní bolest    | <input type="checkbox"/> | Bolest srovnatelná s průměrnou migrénou                                     |
|                                                                      | Naprosto hrozná bolest     | <input type="checkbox"/> | Bolest srovnatelná s porodem nebo opravdu silnou migrénou                   |
|                                                                      | Nesnesitelná bolest        | <input type="checkbox"/> | Bolest nelze ignorovat, vyžaduje léky proti bolesti, nutně navštívit lékaře |

Jak byste posoudil/a Vaši obvyklou míru zrakové pozornosti nebo výdrže při sledování běžného celovečerního filmu?

sleduji bez problémů / sleduji s přestávkami / nemůžu sledovat / nezajímá mne to

Děkujeme Vám za účast v experimentu a při vyplnění dotazníku...



Informace, dotazník a protokol experimentu pro  
**Bezkontaktní ovládání polohovacího lůžka**

řešitel: Ing. Martin Kopeček, MEng, kopecema@lfhk.cuni.cz

Dotazník vyplňte co možná nejdříve po provedení testu.

**Otázky pro instruktora**

Experiment proveden dne: 9. 6. 2020

Jméno instruktora: KOPEČEK M

Jméno pacienta: Pohlaví: M Věk: 57

Číslo logu aplikace:

Typ omezení: Paraparéza, Paraplegie, Kvadruplegie, Pentaplegie, Svalové dystrofie, ALS,

Jiné: EKG

Popis hybnosti: PLM

Brýle / kontaktní čočky: ano /  ne

**Protokol experimentu:**

1. Kalibrace senzoru
2. Vysvětlení principu a umožnění získat zkušenost s ovládáním, alespoň 10 minut
3. Uvedení aplikaci do počátečních podmínek – lůžko v bodě nula   
Čas při započítí testování: 70:30
4. Test 1 
  - a) zahájit oční kontakt s aplikací
  - b) zvednout podpěru nohou (po dobu 2-3 s)
  - c) zvednout podpěru hlavy (po dobu 2-3 s)
  - d) snížit podpěru nohou (po dobu 2-3 s)
  - e) snížit podpěru hlavy (po dobu 2-3 s)
  - f) přerušit oční kontakt s aplikací
7. Test 2 – opakování Testu 1
8. Test 3 – opakování Testu 1   
Čas při ukončení testování: 71:00

Poznámky instruktora k experimentu:

**Otázky pro pacienta**

Získal/a jste jistotu v ovládnání? *ano / spíše ano / nevím / spíše ne / ne*

Jak jste spokojen/a s ovládním aplikace?

- aktivace ovládní *velmi snadná / snadná / běžná / obtížná / velmi obtížná*
- způsob volby polohy *velmi snadný / snadný / běžný / obtížný / velmi obtížný*
- informace o nastavení lůžka *velmi snadné / snadné / běžné / obtížné / velmi obtížné*
- přehlednost ovládní *velmi přehledné / přehledné / běžné / nepřehledné / velmi nepřehledné*

Upřednostnil/a byste ovládní jiným způsobem? *ano / spíše ano / nevím / spíše ne / ne*

*Pokud ano jakým (např. řeč)? .....*

Máte nějaký poznatek k testu nebo ovládní?

*Změna prav zrcad' / bílo!*

Jak byste hodnotil/a Vaši aktuální intenzitu bolesti na uvedené obrazové škále?

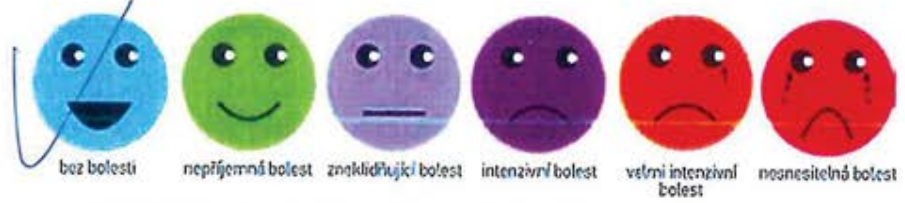

|                                                                      |                            |                          |                                                                             |
|----------------------------------------------------------------------|----------------------------|--------------------------|-----------------------------------------------------------------------------|
| <b>MALÁ NEBO ŽÁDNÁ BOLEST</b><br>Jste schopni se bolesti přizpůsobit | Velmi mírná bolest         | <input type="checkbox"/> | Velmi lehká, sotva znatelná bolest                                          |
|                                                                      | Nepřijemná bolest          | <input type="checkbox"/> | Menší bolest, lze ji přirovnat k lehkému žitpání                            |
|                                                                      | Přijatelná bolest          | <input type="checkbox"/> | Velmi nápadná bolest podobající se píchnutí injekce                         |
| <b>MÍRNÁ BOLEST</b><br>Neslučitelná s mnoha aktivitami               | Zneklidňující bolest       | <input type="checkbox"/> | Silná, hluboká bolest                                                       |
|                                                                      | Velmi zneklidňující bolest | <input type="checkbox"/> | Silná, hluboká, pronikavá bolest, např. vyvrknutý kotník                    |
|                                                                      | Intenzivní bolest          | <input type="checkbox"/> | Ještě silnější bolest srovnatelná s bodnutím několika včelích žihadel       |
| <b>TĚŽKÁ BOLEST</b><br>Nejste schopni fungovat                       | Velmi intenzivní bolest    | <input type="checkbox"/> | Bolest srovnatelná s průměrnou migrénou                                     |
|                                                                      | Náprsto hrozná bolest      | <input type="checkbox"/> | Bolest srovnatelná s porodem nebo opravitu silnou migrénou                  |
|                                                                      | Nesnesitelná bolest        | <input type="checkbox"/> | Bolest nelze ignorovat, vyžaduje léky proti bolesti, nutné navštívit lékaře |

Jak byste posoudil/a Vaši obvyklou míru zrakové pozornosti nebo výdrže při sledování běžného celovečerního filmu?

*sleduji bez problémů / sleduji s přestávkami / nemůžu sledovat / nezajímá mne to*

Děkujeme Vám za účast v experimentu a při vyplnění dotazníku...



70

C7

## Informace, dotazník a protokol experimentu pro Bezkontaktní ovládání polohovacího lůžka

řešitel: Ing. Martin Kopeček, MEng, kopececa@lfhk.cuni.cz

Dotazník vyplňte co možná nejdříve po provedení testu.

### Otázky pro instruktora

Experiment proveden dne: 9. 6. 2020

Jméno instruktora: KOPRŮRKA

Jméno pacienta: \_\_\_\_\_ Pohlaví: ž Věk: 49

Číslo logu aplikace: \_\_\_\_\_

Typ omezení: Paraparéza, Paraplegie, Kvadruplegie, Pentaplegie, Svalové dystrofie, ALS,

Jiné: žádné!

Popis hybnosti: PLM!

Brýle / kontaktní čočky: + 1,5 D BEZ BRÝL! ano /  ne

### Protokol experimentu:

1. Kalibrace senzoru
2. Vysvětlení principu a umožnění získat zkušenost s ovládáním, alespoň 10 minut
3. Uvedení aplikaci do počátečních podmínek – lůžko v bodě nula   
Čas při započítí testování: ..... 965
4. Test 1 
  - a) zahájit oční kontakt s aplikací
  - b) **zvednout** podpěru nohou (po dobu 2-3 s)
  - c) **zvednout** podpěru hlavy (po dobu 2-3 s)
  - d) **snížit** podpěru nohou (po dobu 2-3 s)
  - e) **snížit** podpěru hlavy (po dobu 2-3 s)
  - f) přerušit oční kontakt s aplikací
7. Test 2 – opakování Testu 1
8. Test 3 – opakování Testu 1   
Čas při ukončení testování: ..... 70''

Poznámky instruktora k experimentu:

Otázky pro pacienta

Získal/a jste jistotu v ovládnání?

ano / spíše ano / nevím / spíše ne / ne

Jak jste spokojen/a s ovládním aplikace?

aktivace ovládní

velmi snadná / snadná / běžná / obtížná / velmi obtížná

způsob volby polohy

velmi snadný / snadný / běžný / obtížný / velmi obtížný

informace o nastavení lůžka

velmi snadné / snadné / běžné / obtížné / velmi obtížné

přehlednost ovládní

velmi přehledné / přehledné / běžné / nepřehledné / velmi nepřehledné

Upřednostnil/a byste ovládní jiným způsobem?

ano / spíše ano / nevím / spíše ne / ne

Pokud ano jakým (např. řeč)? .....

Máte nějaký poznatek k testu nebo ovládní?

\_\_\_\_\_

Jak byste hodnotil/a Vaši aktuální intenzitu bolesti na uvedené obrazové škále?

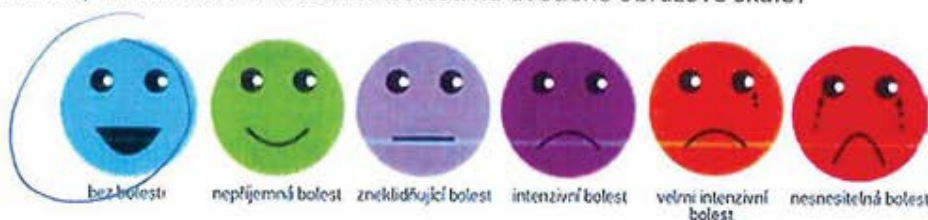

|                                                                      |                            |                          |                                                                             |
|----------------------------------------------------------------------|----------------------------|--------------------------|-----------------------------------------------------------------------------|
| <b>MALÁ NEBO ŽÁDNÁ BOLEST</b><br>Jste schopni se bolesti přizpůsobit | Velmi mírná bolest         | <input type="checkbox"/> | Velmi lehká, sotva znatelná bolest                                          |
|                                                                      | Nepřijemná bolest          | <input type="checkbox"/> | Menší bolest, lze ji přirovnat k lehkému žitpání                            |
|                                                                      | Přijatelná bolest          | <input type="checkbox"/> | Velmi nápadná bolest podobající se píchnutí injekce                         |
| <b>MÍRNÁ BOLEST</b><br>Nestůžitelná s mnoha aktivitami               | Zneklidňující bolest       | <input type="checkbox"/> | Silná, hluboká bolest                                                       |
|                                                                      | Velmi zneklidňující bolest | <input type="checkbox"/> | Silná, hluboká, pronikavá bolest, např. vyvrknutý kotník                    |
|                                                                      | Intenzivní bolest          | <input type="checkbox"/> | Ještě silnější bolest srovnatelná s bodnutím několika včelích žihadel       |
| <b>TĚŽKÁ BOLEST</b><br>Nejste schopni fungovat                       | Velmi intenzivní bolest    | <input type="checkbox"/> | Bolest srovnatelná s průměrnou migrénou                                     |
|                                                                      | Naprostu hrozná bolest     | <input type="checkbox"/> | Bolest srovnatelná s porodem nebo opravdu silnou migrénou                   |
|                                                                      | Nesnesitelná bolest        | <input type="checkbox"/> | Bolest nelze ignorovat, vyžaduje léky proti bolesti, nutné navštívit lékaře |

Jak byste posoudil/a Vaši obvyklou míru zrakové pozornosti nebo výdrže při sledování běžného celovečerního filmu?

sleduji bez problémů / sleduji s přestávkami / nemůžu sledovat / nezajímá mne to

Děkujeme Vám za účast v experimentu a při vyplnění dotazníku...



## Informace, dotazník a protokol experimentu pro Bezkontaktní ovládání polohovacího lůžka

řešitel: Ing. Martin Kopeček, MEng, kopececa@lfhk.cuni.cz

Dotazník vyplňte co možná nejdříve po provedení testu.

### Otázky pro instruktora

Experiment proveden dne: 9.6.2020

Jméno instruktora: KOPEČEK

Jméno pacienta: \_\_\_\_\_ Pohlaví: M Věk: 65

Číslo logu aplikace: \_\_\_\_\_

Typ omezení: Paraparéza, Paraplegie, Kvadruplegie, Pentaplegie, Svalové dystrofie, ALS,

Jiné: ZOBNE'

Popis hybnosti: PLNA'

Brýle / kontaktní čočky: \_\_\_\_\_  ano /  ne

### Protokol experimentu:

1. Kalibrace senzoru
2. Vysvětlení principu a umožnění získat zkušenost s ovládáním, alespoň 10 minut
3. Uvedení aplikací do počátečních podmínek – lůžko v bodě nula   
Čas při započítí testování: 9:15
4. Test 1 
  - a) zahájit oční kontakt s aplikací
  - b) **zvednout** podpěru nohou (po dobu 2-3 s)
  - c) **zvednout** podpěru hlavy (po dobu 2-3 s)
  - d) **snížit** podpěru nohou (po dobu 2-3 s)
  - e) **snížit** podpěru hlavy (po dobu 2-3 s)
  - f) přerušit oční kontakt s aplikací
7. Test 2 – opakování Testu 1
8. Test 3 – opakování Testu 1   
Čas při ukončení testování: 9:30

Poznámky instruktora k experimentu:

## Otázky pro pacienta

Získal/a jste jistotu v ovládnání?

ano / spíše ano / nevím / spíše ne / ne

Jak jste spokojen/a s ovládním aplikace?

aktivace ovládní

velmi snadná / snadná / běžná / obtížná / velmi obtížná

způsob volby polohy

velmi snadný / snadný / běžný / obtížný / velmi obtížný

informace o nastavení lůžka

velmi snadně / snadné / běžné / obtížné / velmi obtížné

přehlednost ovládní

velmi přehledně / přehledně / běžné / nepřehledně / velmi nepřehledně

Upřednostnil/a byste ovládní jiným způsobem?

ano / spíše ano / nevím / spíše ne / ne

Pokud ano jakým (např. řeč)? .....

Máte nějaký poznatek k testu nebo ovládní?

funkce vyborné

Jak byste hodnotil/a Vaši aktuální intenzitu bolesti na uvedené obrazové škále?

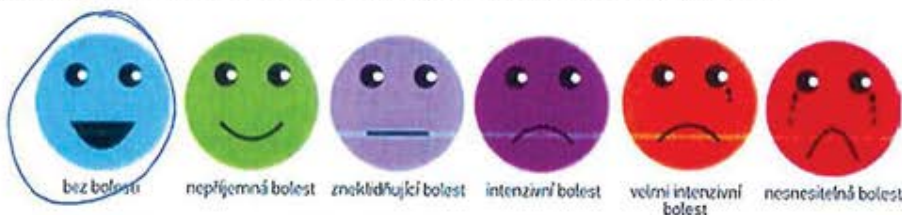

|                                                                      |                            |                          |                                                                             |
|----------------------------------------------------------------------|----------------------------|--------------------------|-----------------------------------------------------------------------------|
| <b>MALÁ NEBO ŽÁDNÁ BOLEST</b><br>Jste schopni se bolesti přizpůsobit | Velmi mírná bolest         | <input type="checkbox"/> | Velmi lehká, sotva znatelná bolest                                          |
|                                                                      | Nepříjemná bolest          | <input type="checkbox"/> | Menší bolest, lze ji přirovnat k lehkému štipání                            |
|                                                                      | Přijatelná bolest          | <input type="checkbox"/> | Velmi nápadná bolest podobající se píchnutí injekce                         |
| <b>MÍRNÁ BOLEST</b><br>Neslučitelná s mnoha aktivitami               | Zneklidňující bolest       | <input type="checkbox"/> | Silná, hluboká bolest                                                       |
|                                                                      | Velmi zneklidňující bolest | <input type="checkbox"/> | Silná, hluboká, pronikavá bolest, např. vyvrknutý kotník                    |
|                                                                      | Intenzivní bolest          | <input type="checkbox"/> | Ještě silnější bolest srovnatelná s bodnutím několika včelích žihadel       |
| <b>TĚŽKÁ BOLEST</b><br>Nejste schopni fungovat                       | Velmi intenzivní bolest    | <input type="checkbox"/> | Bolest srovnatelná s průměrnou migrénou                                     |
|                                                                      | Naprostě hrozná bolest     | <input type="checkbox"/> | Bolest srovnatelná s porodem nebo opravdu silnou migrénou                   |
|                                                                      | Nesnesitelná bolest        | <input type="checkbox"/> | Bolest nelze ignorovat, vyžaduje léky proti bolesti, nutně navštívit lékaře |

Jak byste posoudil/a Vaši obvyklou míru zrakové pozornosti nebo výdrže při sledování běžného celovečerního filmu?

sleduji bez problémů / sleduji s přestávkami / nemůžu sledovat / nezajímá mne to

Děkujeme Vám za účast v experimentu a při vyplnění dotazníku...



PO

C9

## Informace, dotazník a protokol experimentu pro Bezkontaktní ovládání polohovacího lůžka

řešitel: Ing. Martin Kopeček, MEng, kopecema@lfhk.cuni.cz

Dotazník vyplňte co možná nejdříve po provedení testu.

### Otázky pro instruktora

Experiment proveden dne: 8.6.2020

Jméno instruktora: Kopeček

Jméno pacienta: \_\_\_\_\_ Pohlaví: M Věk: 34

Číslo logu aplikace: \_\_\_\_\_

Typ omezení: Paraparéza, Paraplegie, Kvadruplegie, Pentaplegie, Svalové dystrofie, ALS,

Jiné: ZADNE'

Popis hybnosti: PLNA'

Brýle / kontaktní čočky: \_\_\_\_\_ ano /  ne

### Protokol experimentu:

1. Kalibrace senzoru

2. Vysvětlení principu a umožnění získat zkušenost s ovládáním, alespoň 10 minut

3. Uvedení aplikaci do počátečních podmínek – lůžko v bodě nula

Čas při započetí testování: ..... 13<sup>00</sup> .....

4. Test 1

- a) zahájit oční kontakt s aplikací
- b) zvednout podpěru nohou (po dobu 2-3 s)
- c) zvednout podpěru hlavy (po dobu 2-3 s)
- d) snížit podpěru nohou (po dobu 2-3 s)
- e) snížit podpěru hlavy (po dobu 2-3 s)
- f) přerušit oční kontakt s aplikací

7. Test 2 – opakování Testu 1

8. Test 3 – opakování Testu 1

Čas při ukončení testování: ..... 13<sup>15</sup> .....

Poznámky instruktora k experimentu:

Otázky pro pacienta

Získal/a jste jistotu v ovládnání?

ano / spíše ano / nevím / spíše ne / ne

Jak jste spokojen/a s ovládním aplikace?

aktivace ovládní

velmi snadná / snadná / běžná / obtížná / velmi obtížná

způsob volby polohy

velmi snadný / snadný / běžný / obtížný / velmi obtížný

informace o nastavení lůžka

velmi snadné / snadné / běžné / obtížné / velmi obtížné

přehlednost ovládní

velmi přehledné / přehledné / běžné / nepřehledné / velmi nepřehledné

Upřednostnil/a byste ovládní jiným způsobem?

ano / spíše ano / nevím / spíše ne / ne

Pokud ano jakým (např. řeč)? .....

Máte nějaký poznatek k testu nebo ovládní?

Jak byste hodnotil/a Vaši aktuální intenzitu bolesti na uvedené obrazové škále?

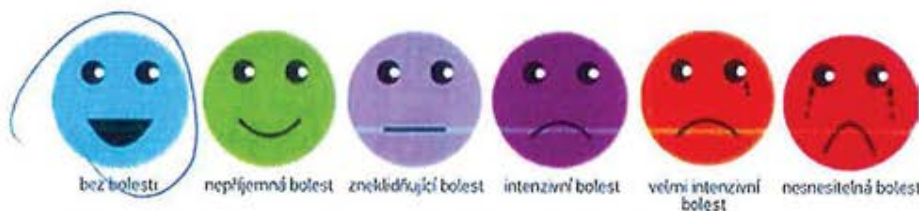

|                                                                      |                            |                          |                                                                             |
|----------------------------------------------------------------------|----------------------------|--------------------------|-----------------------------------------------------------------------------|
| <b>MALÁ NEBO ŽÁDNÁ BOLEST</b><br>Jste schopni se bolesti přizpůsobit | Velmi mírná bolest         | <input type="checkbox"/> | Velmi lehká, sotva znetelná bolest                                          |
|                                                                      | Nepřijemná bolest          | <input type="checkbox"/> | Menší bolest, lze ji přirovnat k lehkému štípání                            |
|                                                                      | Přijatelná bolest          | <input type="checkbox"/> | Velmi nápadná bolest podobající se píchnutí injekce                         |
| <b>MÍRNÁ BOLEST</b><br>Neslučitelná s mnoha aktivitami               | Zneklidňující bolest       | <input type="checkbox"/> | Silná, hluboká bolest                                                       |
|                                                                      | Velmi zneklidňující bolest | <input type="checkbox"/> | Silná, hluboká, pronikavá bolest, např. vyvrknutý kotník                    |
|                                                                      | Intenzivní bolest          | <input type="checkbox"/> | Ještě silnější bolest srovnatelná s bodnutím několika včelích žihadel       |
| <b>TĚŽKÁ BOLEST</b><br>Nejste schopni fungovat                       | Velmi intenzivní bolest    | <input type="checkbox"/> | Bolest srovnatelná s průměrnou migrénou                                     |
|                                                                      | Naprostu hrozná bolest     | <input type="checkbox"/> | Bolest srovnatelná s porodem nebo opravdu silnou migrénou                   |
|                                                                      | Nesnesitelná bolest        | <input type="checkbox"/> | Bolest nelze ignorovat, vyžaduje léky proti bolesti, nutné navštívit lékaře |

Jak byste posoudil/a Vaši obvyklou míru zrakové pozornosti nebo výdrže při sledování běžného celovečerního filmu?

sleduji bez problémů / sleduji s přestávkami / nemůžu sledovat / nezajímá mne to

Děkujeme Vám za účast v experimentu a při vyplnění dotazníku...



013

C 10

## Informace, dotazník a protokol experimentu pro Bezkontaktní ovládání polohovacího lůžka

řešitel: Ing. Martin Kopeček, MEng, kopececa@lfhk.cuni.cz

Dotazník vyplňte co možná nejdříve po provedení testu.

### Otázky pro instruktora

Experiment proveden dne: 8.6.2020

Jméno instruktora: KOPEČEK

Jméno pacienta: ' Pohlaví: ž Věk: 49

Číslo logu aplikace: \_\_\_\_\_

Typ omezení: Paraparéza, Paraplegie, Kvadruplegie, Pentaplegie, Svalové dystrofie, ALS,

Jiné: ŠDNE

Popis hybnosti: PLAD

Brýle / kontaktní čočky: ASTIGMAT.  ano /  ne

### Protokol experimentu:

1. Kalibrace senzoru
2. Vysvětlení principu a umožnění získat zkušenost s ovládáním, alespoň 10 minut
3. Uvedení aplikaci do počátečních podmínek – lůžko v bodě nula   
Čas při započítí testování: 11:30
4. Test 1 
  - a) zahájit oční kontakt s aplikací
  - b) zvednout podpěru nohou (po dobu 2-3 s)
  - c) zvednout podpěru hlavy (po dobu 2-3 s)
  - d) snížit podpěru nohou (po dobu 2-3 s)
  - e) snížit podpěru hlavy (po dobu 2-3 s)
  - f) přerušit oční kontakt s aplikací
7. Test 2 – opakování Testu 1
8. Test 3 – opakování Testu 1   
Čas při ukončení testování: 11:45

Poznámky instruktora k experimentu:

**Otázky pro pacienta**

Získal/a jste jistotu v ovládnání?

ano / spíše ano / nevím / spíše ne / ne

Jak jste spokojen/a s ovládním aplikace?

aktivace ovládní

velmi snadná / snadná / běžná / obtížná / velmi obtížná

způsob volby polohy

velmi snadný / snadný / běžný / obtížný / velmi obtížný

informace o nastavení lůžka

velmi snadné / snadné / běžné / obtížné / velmi obtížné

přehlednost ovládní

velmi přehledné / přehledné / běžné / nepřehledné / velmi nepřehledné

Upřednostnil/a byste ovládní jiným způsobem?

ano / spíše ano / nevím / spíše ne / ne

Pokud ano jakým (např. řeč)? .....

Máte nějaký poznatek k testu nebo ovládní?

Jak byste hodnotil/a Vaši aktuální intenzitu bolesti na uvedené obrazové škále?

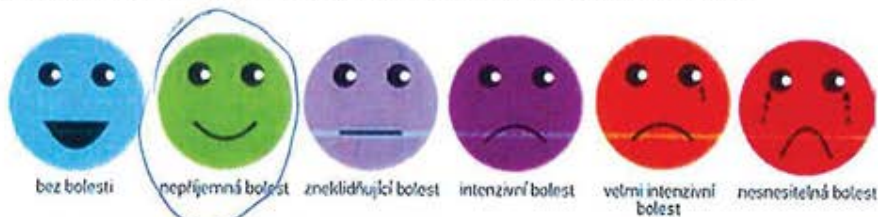

|                                                                      |                          |                          |                                                                            |
|----------------------------------------------------------------------|--------------------------|--------------------------|----------------------------------------------------------------------------|
| <b>MALÁ NEBO ŽÁDNÁ BOLEST</b><br>Jste schopni se bolesti přizpůsobit | Velmi mírná bolest       | <input type="checkbox"/> | Velmi lehká, sotva zratelná bolest                                         |
|                                                                      | Nepříjemná bolest        | <input type="checkbox"/> | Menší bolest, lze ji přirovnat k lehkému žitpání                           |
|                                                                      | Přijatelná bolest        | <input type="checkbox"/> | Velmi nápadná bolest podobající se píchnutí injekce                        |
| <b>MÍRNÁ BOLEST</b><br>Neslučitelná s mnoha aktivitami               | Zklidňující bolest       | <input type="checkbox"/> | Silná, hluboká bolest                                                      |
|                                                                      | Velmi zklidňující bolest | <input type="checkbox"/> | Silná, hluboká, pronikavá bolest, např. vyvrknutý kotník                   |
|                                                                      | Intenzivní bolest        | <input type="checkbox"/> | Ještě silnější bolest srovnatelná s bodnutím několika včelích žihadel      |
| <b>TĚŽKÁ BOLEST</b><br>Nejste schopni fungovat                       | Velmi intenzivní bolest  | <input type="checkbox"/> | Bolest srovnatelná s průměrnou migrénou                                    |
|                                                                      | Náprsto hrozná bolest    | <input type="checkbox"/> | Bolest srovnatelná s porodem nebo opravdu silnou migrénou                  |
|                                                                      | Nesnesitelná bolest      | <input type="checkbox"/> | Bolest nelze ignorovat, vyžaduje léky proti bolesti, rutně navštíví lékaře |

Jak byste posoudil/a Vaši obvyklou míru zrakové pozornosti nebo výdrže při sledování běžného celovečerního filmu?

sleduji bez problémů / sleduji s přestávkami / nemůžu sledovat / nezajímá mne to

Děkujeme Vám za účast v experimentu a při vyplnění dotazníku...



# Informace, dotazník a protokol experimentu pro Bezkontaktní ovládání polohovacího lůžka

řešitel: Ing. Martin Kopeček, MEng, kopecema@lfhk.cuni.cz

Dotazník vyplňte co možná nejdříve po provedení testu.

## Otázky pro instruktora

Experiment proveden dne: 5.6.2020

Jméno instruktora: KOPEČEK

Jméno pacienta: \_\_\_\_\_ Pohlaví: z Věk: 48

Číslo logu aplikace: \_\_\_\_\_

Typ omezení: Paraparéza, Paraplegie, Kvadruplegie, Pentaplegie, Svalové dystrofie, ALS,

Jiné: ZOBRAŤ

Popis hybnosti: PLNO

Brýle / kontaktní čočky: \_\_\_\_\_ ano /  ne

## Protokol experimentu:

- 1. Kalibrace senzoru
- 2. Vysvětlení principu a umožnění získat zkušenost s ovládáním, alespoň 10 minut
- 3. Uvedení aplikaci do počátečních podmínek – lůžko v bodě nula   
 Čas při započetí testování: ..... 10<sup>15</sup>
- 4. Test 1 
  - a) zahájit oční kontakt s aplikací
  - b) **zvednout** podpěru nohou (po dobu 2-3 s)
  - c) **zvednout** podpěru hlavy (po dobu 2-3 s)
  - d) **snížit** podpěru nohou (po dobu 2-3 s)
  - e) **snížit** podpěru hlavy (po dobu 2-3 s)
  - f) přerušit oční kontakt s aplikací
- 7. Test 2 – opakování Testu 1
- 8. Test 3 – opakování Testu 1   
 Čas při ukončení testování: ..... 10<sup>30</sup>

Poznámky instruktora k experimentu:

## Otázky pro pacienta

Získal/a jste jistotu v ovládnání?

ano / spíše ano / nevím / spíše ne / ne

Jak jste spokojen/a s ovládním aplikace?

aktivace ovládnání

velmi snadná / snadná / běžná / obtížná / velmi obtížná

způsob volby polohy

velmi snadný / snadný / běžný / obtížný / velmi obtížný

informace o nastavení lůžka

velmi snadné / snadné / běžné / obtížné / velmi obtížné

přehlednost ovládnání

velmi přehledné / přehledné / běžné / nepřehledné / velmi nepřehledné

Upřednostnil/a byste ovládnání jiným způsobem?

ano / spíše ano / nevím / spíše ne / ne

Pokud ano jakým (např. řeč)? .....

Máte nějaký poznatek k testu nebo ovládnání?

Jak byste hodnotil/a Vaši aktuální intenzitu bolesti na uvedené obrazové škále?

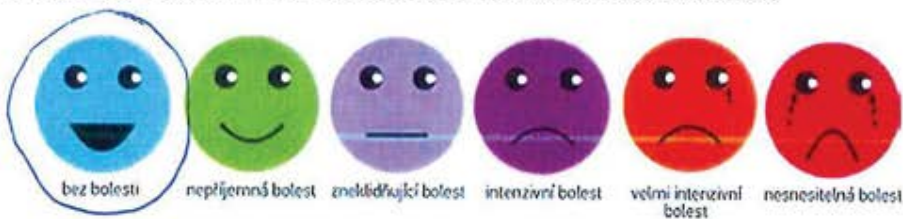

|                                                                      |                            |                          |                                                                             |
|----------------------------------------------------------------------|----------------------------|--------------------------|-----------------------------------------------------------------------------|
| <b>MALÁ NEBO ŽÁDNÁ BOLEST</b><br>Jste schopni se bolesti přizpůsobit | Velmi mírná bolest         | <input type="checkbox"/> | Velmi lehká, sotva znatelná bolest                                          |
|                                                                      | Nepříjemná bolest          | <input type="checkbox"/> | Menší bolest, lze ji přirovnat k lehkému štipání                            |
|                                                                      | Přijatelná bolest          | <input type="checkbox"/> | Velmi nápadná bolest podobající se píchnutí injekce                         |
| <b>MÍRNÁ BOLEST</b><br>Neslučitelná s mnoha aktivitami               | Zneklidňující bolest       | <input type="checkbox"/> | Silná, hluboká bolest                                                       |
|                                                                      | Velmi zneklidňující bolest | <input type="checkbox"/> | Silná, hluboká, pronikavá bolest, např. vyvrknutý kotník                    |
|                                                                      | Intenzivní bolest          | <input type="checkbox"/> | Ještě silnější bolest srovnatelná s bodnutím několika včelích žihadel       |
| <b>TĚŽKÁ BOLEST</b><br>Nejste schopni fungovat                       | Velmi intenzivní bolest    | <input type="checkbox"/> | Bolest srovnatelná s průměrnou migrénou                                     |
|                                                                      | Naprostě hrozná bolest     | <input type="checkbox"/> | Bolest srovnatelná s porodem nebo opravdu silnou migrénou                   |
|                                                                      | Nesnesitelná bolest        | <input type="checkbox"/> | Bolest netře ignorovat, vyžaduje léky proti bolesti, nutné navštívit lékaře |

Jak byste posoudil/a Vaši obvyklou míru zrakové pozornosti nebo výdrže při sledování běžného celovečerního filmu?

sleduji bez problémů / sleduji s přestávkami / nemůžu sledovat / nezajímá mne to

Děkujeme Vám za účast v experimentu a při vyplnění dotazníku...



## Informace, dotazník a protokol experimentu pro Bezkontaktní ovládání polohovacího lůžka

řešitel: Ing. Martin Kopeček, MEng, kopecema@lfhk.cuni.cz

Dotazník vyplňte co možná nejdříve po provedení testu.

### Otázky pro instruktora

Experiment proveden dne: 5.6.2020

Jméno instruktora: KOPRDEK

Jméno pacienta: \_\_\_\_\_ Pohlaví: 07 Věk: 66

Číslo logu aplikace: \_\_\_\_\_

Typ omezení: Paraparéza, Paraplegie, Kvadruplegie, Pentaplegie, Svalové dystrofie, ALS,

Jiné: ZADNÍ

Popis hybnosti: PLNÁ

Brýle / kontaktní čočky: \_\_\_\_\_  ano /  ne

### Protokol experimentu:

1. Kalibrace senzoru
2. Vysvětlení principu a umožnění získat zkušenost s ovládáním, alespoň 10 minut
3. Uvedení aplikaci do počátečních podmínek – lůžko v bodě nula   
Čas při započítí testování: .....
4. Test 1 
  - a) zahájit oční kontakt s aplikací
  - b) zvednout podpěru nohou (po dobu 2-3 s)
  - c) zvednout podpěru hlavy (po dobu 2-3 s)
  - d) snížit podpěru nohou (po dobu 2-3 s)
  - e) snížit podpěru hlavy (po dobu 2-3 s)
  - f) přerušit oční kontakt s aplikací
7. Test 2 – opakování Testu 1
8. Test 3 – opakování Testu 1   
Čas při ukončení testování: .....

Poznámky instruktora k experimentu:

**Otázky pro pacienta**

Získal/a jste jistotu v ovládnání?

ano / spíše ano / nevím / spíše ne / ne

Jak jste spokojen/a s ovládním aplikace?

aktivace ovládní

velmi snadná / snadná / běžná / obtížná / velmi obtížná

způsob volby polohy

velmi snadný / snadný / běžný / obtížný / velmi obtížný

informace o nastavení lůžka

velmi snadné / snadné / běžné / obtížné / velmi obtížné

přehlednost ovládní

velmi přehledné / přehledné / běžné / nepřehledné / velmi nepřehledné

Upřednostnil/a byste ovládní jiným způsobem?

ano / spíše ano / nevím / spíše ne / ne

Pokud ano jakým (např. řeč)? .....

Máte nějaký poznatek k testu nebo ovládním?

Jak byste hodnotil/a Vaši aktuální intenzitu bolesti na uvedené obrazové škále?

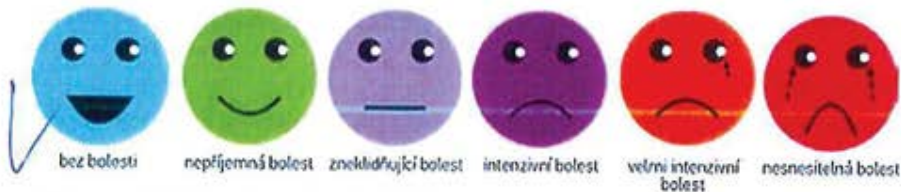

|                                                                      |                            |                          |                                                                             |
|----------------------------------------------------------------------|----------------------------|--------------------------|-----------------------------------------------------------------------------|
| <b>MALÁ NEBO ŽÁDNÁ BOLEST</b><br>Jste schopni se bolesti přizpůsobit | Velmi mírná bolest         | <input type="checkbox"/> | Velmi lehká, sotva zratelná bolest                                          |
|                                                                      | Nepřijemná bolest          | <input type="checkbox"/> | Menší bolest, lze ji přirovnat k lehkému žitpání                            |
|                                                                      | Přijatelná bolest          | <input type="checkbox"/> | Velmi nápadná bolest podobající se píchnutí injekce                         |
| <b>MÍRNÁ BOLEST</b><br>Neslučitelná s mnoha aktivitami               | Zneklidňující bolest       | <input type="checkbox"/> | Silná, hluboká bolest                                                       |
|                                                                      | Velmi zneklidňující bolest | <input type="checkbox"/> | Silná, hluboká, pronikavá bolest, např. vyvrknutý kotník                    |
|                                                                      | Intenzivní bolest          | <input type="checkbox"/> | Ještě silnější bolest srovnatelná s bodnutím několika včelích žihadel       |
| <b>TĚŽKÁ BOLEST</b><br>Nějste schopni fungovat                       | Velmi intenzivní bolest    | <input type="checkbox"/> | Bolest srovnatelná s průměrnou migrénou                                     |
|                                                                      | Naprostu hrozná bolest     | <input type="checkbox"/> | Bolest srovnatelná s porodem nebo opravdu silnou migrénou                   |
|                                                                      | Nesnesitelná bolest        | <input type="checkbox"/> | Bolest netze ignorovat, vyžaduje léky proti bolesti, nutně navštívit lékaře |

Jak byste posoudil/a Vaši obvyklou míru zrakové pozornosti nebo výdrže při sledování běžného celovečerního filmu?

sleduji bez problémů / sleduji s přestávkami / nemůžu sledovat / nezajímá mne to

Děkujeme Vám za účast v experimentu a při vyplnění dotazníku...



## Informace, dotazník a protokol experimentu pro Bezkontaktní ovládání polohovacího lůžka

řešitel: Ing. Martin Kopeček, MEng, kopece@lfhk.cuni.cz

Dotazník vyplňte co možná nejdříve po provedení testu.

### Otázky pro instruktora

Experiment proveden dne: 5.6.2020

Jméno instruktora: KOPEČEK

Jméno pacienta: \_\_\_\_\_ Pohlaví: ž Věk: 50

Číslo logu aplikace: \_\_\_\_\_

Typ omezení: Paraparéza, Paraplegie, Kvadruplegie, Pentaplegie, Svalové dystrofie, ALS,

Jiné: ŽÁDNÉ

Popis hybnosti: PLAČ

Brýle / kontaktní čočky: \_\_\_\_\_ ano /  ne

### Protokol experimentu:

1. Kalibrace senzoru
2. Vysvětlení principu a umožnění získat zkušenost s ovládáním, alespoň 10 minut
3. Uvedení aplikaci do počátečních podmínek – lůžko v bodě nula   
Čas při započítí testování: 9:15
4. Test 1 
  - a) zahájit oční kontakt s aplikací
  - b) zvednout podpěru nohou (po dobu 2-3 s)
  - c) zvednout podpěru hlavy (po dobu 2-3 s)
  - d) snížit podpěru nohou (po dobu 2-3 s)
  - e) snížit podpěru hlavy (po dobu 2-3 s)
  - f) přerušit oční kontakt s aplikací
7. Test 2 – opakování Testu 1
8. Test 3 – opakování Testu 1   
Čas při ukončení testování: 9:30

Poznámky instruktora k experimentu:

TEST 2 STATNĚ NAVEDEN

**Otázky pro pacienta**

Získal/a jste jistotu v ovládnání?

*ano / spíše ano / nevím / spíše ne / ne*

Jak jste spokojen/a s ovládním aplikace?

aktivace ovládní

*velmi snadná / snadná / běžná / obtížná / velmi obtížná*

způsob volby polohy

*velmi snadný / snadný / běžný / obtížný / velmi obtížný*

informace o nastavení lůžka

*velmi snadné / snadné / běžné / obtížné / velmi obtížné*

přehlednost ovládní

*velmi přehledné / přehledné / běžné / nepřehledné / velmi nepřehledné*

Upřednostnil/a byste ovládní jiným způsobem?

*ano / spíše ano / nevím / spíše ne / ne*

*Pokud ano jakým (např. řeč)? .....*

Máte nějaký poznatek k testu nebo ovládní?

---



---

Jak byste hodnotil/a Vaši aktuální intenzitu bolesti na uvedené obrazové škále?

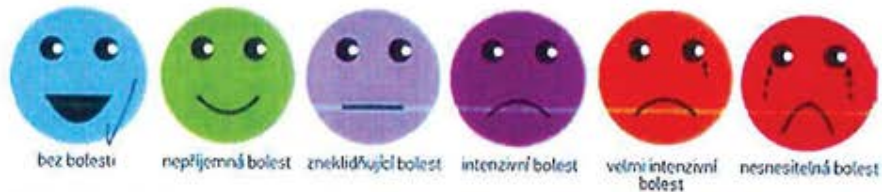

|                                                                      |                          |                          |                                                                             |
|----------------------------------------------------------------------|--------------------------|--------------------------|-----------------------------------------------------------------------------|
| <b>MALÁ NEBO ŽÁDNÁ BOLEST</b><br>Jste schopni se bolesti přizpůsobit | Velmi mírná bolest       | <input type="checkbox"/> | Velmi lehká, sotva znatelná bolest                                          |
|                                                                      | Nepříjemná bolest        | <input type="checkbox"/> | Menší bolest, lze ji přirovnat k lehkému štípání                            |
|                                                                      | Přijatelná bolest        | <input type="checkbox"/> | Velmi nápadná bolest podobající se píchnutí injekce                         |
| <b>MÍRNÁ BOLEST</b><br>Neslučitelná s mnoha aktivitami               | Zklidňující bolest       | <input type="checkbox"/> | Silná, hluboká bolest                                                       |
|                                                                      | Velmi zklidňující bolest | <input type="checkbox"/> | Silná, hluboká, pronikavá bolest, např. vyvrknutý kotník                    |
|                                                                      | Intenzivní bolest        | <input type="checkbox"/> | Ještě silnější bolest srovnatelná s bodnutím několika větších žihadel       |
| <b>TĚŽKÁ BOLEST</b><br>Nejste schopni fungovat                       | Velmi intenzivní bolest  | <input type="checkbox"/> | Bolest srovnatelná s průměrnou migrénou                                     |
|                                                                      | Naprosto hrůzná bolest   | <input type="checkbox"/> | Bolest srovnatelná s porodem nebo opravdu silnou migrénou                   |
|                                                                      | Nesnesitelná bolest      | <input type="checkbox"/> | Bolest nelze ignorovat, vyžaduje léky proti bolesti, nutně navštívit lékaře |

Jak byste posoudil/a Vaši obvyklou míru zrakové pozornosti nebo výdrže při sledování běžného celovečerního filmu?

*sleduji bez problémů / sleduji s přestávkami / nemůžu sledovat / nezajímá mne to*

Děkujeme Vám za účast v experimentu a při vyplnění dotazníku...



410

C 14

# Informace, dotazník a protokol experimentu pro Bezkontaktní ovládání polohovacího lůžka

řešitel: Ing. Martin Kopeček, MEng, kopecema@lfhk.cuni.cz

Dotazník vyplňte co možná nejdříve po provedení testu.

## Otázky pro instruktora

Experiment proveden dne: 4.6.2020

Jméno instruktora: KOPEČEK M.

Jméno pacienta: \_\_\_\_\_ ohlaví: 2 Věk: 34

Číslo logu aplikace: \_\_\_\_\_

Typ omezení: Paraparéza, Paraplegie, Kvadruplegie, Pentaplegie, Svalové dystrofie, ALS,

Jiné: EHDA

Popis hybnosti: PLMA

Brýle / kontaktní čočky: \_\_\_\_\_  ano /  ne

## Protokol experimentu:

- 1. Kalibrace senzoru
- 2. Vysvětlení principu a umožnění získat zkušenost s ovládáním, alespoň 10 minut
- 3. Uvedení aplikaci do počátečních podmínek – lůžko v bodě nula   
 Čas při započetí testování: ..... 15<sup>00</sup> .....
- 4. Test 1 
  - a) zahájit oční kontakt s aplikací
  - b) **zvednout** podpěru nohou (po dobu 2-3 s)
  - c) **zvednout** podpěru hlavy (po dobu 2-3 s)
  - d) **snížit** podpěru nohou (po dobu 2-3 s)
  - e) **snížit** podpěru hlavy (po dobu 2-3 s)
  - f) přerušit oční kontakt s aplikací
- 7. Test 2 – opakování Testu 1
- 8. Test 3 – opakování Testu 1   
 Čas při ukončení testování: ..... 15<sup>15</sup> .....

Poznámky instruktora k experimentu:

Otázky pro pacienta

Získal/a jste jistotu v ovládnání?

ano / spíše ano / nevím / spíše ne / ne

Jak jste spokojen/a s ovládním aplikace?

aktivace ovládní

velmi snadná / snadná / běžná / obtížná / velmi obtížná

způsob volby polohy

velmi snadný / snadný / běžný / obtížný / velmi obtížný

informace o nastavení lůžka

velmi snadné / snadné / běžné / obtížné / velmi obtížné

přehlednost ovládní

velmi přehledné / přehledné / běžné / nepřehledné / velmi nepřehledné

Upřednostnil/a byste ovládní jiným způsobem?

ano / spíše ano / nevím / spíše ne / ne

Pokud ano jakým (např. řeč)? .....

Máte nějaký poznatek k testu nebo ovládní?

Jak byste hodnotil/a Vaši aktuální intenzitu bolesti na uvedené obrazové škále?

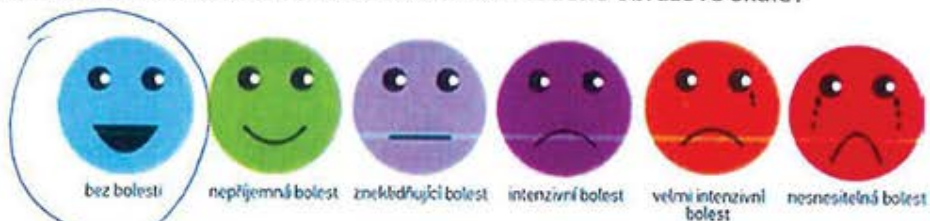

|                                                                      |                            |                          |                                                                             |
|----------------------------------------------------------------------|----------------------------|--------------------------|-----------------------------------------------------------------------------|
| <b>MALÁ NEBO ŽÁDNÁ BOLEST</b><br>Jste schopni se bolesti přizpůsobit | Velmi mírná bolest         | <input type="checkbox"/> | Velmi lehká, sotva znatelná bolest                                          |
|                                                                      | Nepříjemná bolest          | <input type="checkbox"/> | Menší bolest, lze ji přirovnat k lehkému štipání                            |
|                                                                      | Přijatelná bolest          | <input type="checkbox"/> | Velmi nápadná bolest podobající se píchnutí injekce                         |
| <b>MÍRNÁ BOLEST</b><br>Neslučitelná s mnoha aktivitami               | Zneklidňující bolest       | <input type="checkbox"/> | Silná, hluboká bolest                                                       |
|                                                                      | Velmi zneklidňující bolest | <input type="checkbox"/> | Silná, hluboká, pronikavá bolest, např. vyvrknutý kotník                    |
|                                                                      | Intenzivní bolest          | <input type="checkbox"/> | Ještě silnější bolest srovnatelná s bodnutím několika včelích žihadel       |
| <b>TĚŽKÁ BOLEST</b><br>Nejste schopni fungovat                       | Velmi intenzivní bolest    | <input type="checkbox"/> | Bolest srovnatelná s průměrnou migrénou                                     |
|                                                                      | Naprosto hrozná bolest     | <input type="checkbox"/> | Bolest srovnatelná s porodem nebo opravdu silnou migrénou                   |
|                                                                      | Nesnesitelná bolest        | <input type="checkbox"/> | Bolest nelze ignorovat, vyžaduje léky proti bolesti, nutně navštívit lékaře |

Jak byste posoudil/a Vaši obvyklou míru zrakové pozornosti nebo výdrže při sledování běžného celovečerního filmu?

sleduji bez problémů / sleduji s přestávkami / nemůžu sledovat / nezajímá mne to

Děkujeme Vám za účast v experimentu a při vyplnění dotazníku...



## Informace, dotazník a protokol experimentu pro Bezkontaktní ovládání polohovacího lůžka

řešitel: Ing. Martin Kopeček, MEng, kopeceema@lfhk.cuni.cz

Dotazník vyplňte co možná nejdříve po provedení testu.

### Otázky pro instruktora

Experiment proveden dne: 28. 5. 2020

Jméno instruktora: Kopeček

Jméno pacienta: ' 1

Pohlaví: Ž

Věk: 24

Číslo logu aplikace:

Typ omezení: Paraparéza, Paraplegie, Kvadruplegie, Pentaplegie, Svalové dystrofie, ALS,

Jiné: ŽO'DM'

Popis hybnosti: PLMB'

Brýle / kontaktní čočky:

ano / ne

?

### Protokol experimentu:

1. Kalibrace senzoru
2. Vysvětlení principu a umožnění získat zkušenost s ovládáním, alespoň 10 minut
3. Uvedení aplikaci do počátečních podmínek – lůžko v bodě nula

Čas při započítí testování: 8:15

#### 4. Test 1

- a) zahájit oční kontakt s aplikací
- b) zvednout podpěru nohou (po dobu 2-3 s)
- c) zvednout podpěru hlavy (po dobu 2-3 s)
- d) snížit podpěru nohou (po dobu 2-3 s)
- e) snížit podpěru hlavy (po dobu 2-3 s)
- f) přerušit oční kontakt s aplikací

#### 7. Test 2 – opakování Testu 1

#### 8. Test 3 – opakování Testu 1

Čas při ukončení testování: 8:50

Poznámky instruktora k experimentu:

**Otázky pro pacienta**

Získal/a jste jistotu v ovládnání?

ano / spíše ano / nevím / spíše ne / ne

Jak jste spokojen/a s ovládním aplikace?

aktivace ovládní

velmi snadná / snadná / běžná / obtížná / velmi obtížná

způsob volby polohy

velmi snadný / snadný / běžný / obtížný / velmi obtížný

informace o nastavení lůžka

velmi snadné / snadné / běžné / obtížné / velmi obtížné

přehlednost ovládní

velmi přehledné / přehledné / běžné / nepřehledné / velmi nepřehledné

Upřednostnil/a byste ovládní jiným způsobem?

ano / spíše ano / nevím / spíše ne / ne

Pokud ano jakým (např. řeč)? .....

Máte nějaký poznatek k testu nebo ovládním?

Jak byste hodnotil/a Vaši aktuální intenzitu bolesti na uvedené obrazové škále?

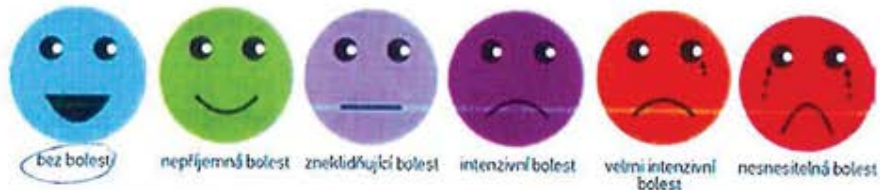

|                                                                      |                            |                          |                                                                             |
|----------------------------------------------------------------------|----------------------------|--------------------------|-----------------------------------------------------------------------------|
| <b>MALÁ NEBO ŽÁDNÁ BOLEST</b><br>Jste schopni se bolesti přizpůsobit | Velmi mírná bolest         | <input type="checkbox"/> | Velmi lehká, sotva ztatečná bolest                                          |
|                                                                      | Nepřijemná bolest          | <input type="checkbox"/> | Menší bolest, lze ji přirovnat k lehkému štípání                            |
|                                                                      | Přijatelná bolest          | <input type="checkbox"/> | Velmi nápadná bolest podobající se píchnutí injekce                         |
| <b>MÍRNÁ BOLEST</b><br>Neslučitelná s mnoha aktivitami               | Zneklidňující bolest       | <input type="checkbox"/> | Silná, hluboká bolest                                                       |
|                                                                      | Velmi zneklidňující bolest | <input type="checkbox"/> | Silná, hluboká, pronikavá bolest, např. vyvrknutý kotník                    |
|                                                                      | Intenzivní bolest          | <input type="checkbox"/> | Ještě silnější bolest srovnatelná s bodnutím několika včelích žihadel       |
| <b>TĚŽKÁ BOLEST</b><br>Nějste schopni fungovat                       | Velmi intenzivní bolest    | <input type="checkbox"/> | Bolest srovnatelná s průměrnou migrénou                                     |
|                                                                      | Naprostu hrůzná bolest     | <input type="checkbox"/> | Bolest srovnatelná s porodem nebo opravdu silnou migrénou                   |
|                                                                      | Nesnesitelná bolest        | <input type="checkbox"/> | Bolest nelze ignorovat, vyžaduje léky proti bolesti, nutně navštívit lékaře |

Jak byste posoudil/a Vaši obvyklou míru zrakové pozornosti nebo výdrže při sledování běžného celovečerního filmu?

sleduji bez problémů / sleduji s přestávkami / nemůžu sledovat / nezajímá mne to

Děkujeme Vám za účast v experimentu a při vyplnění dotazníku...

## Informace, dotazník a protokol experimentu pro Bezkontaktní ovládání polohovacího lůžka

řešitel: Ing. Martin Kopeček, MEng, kopeceema@lfhk.cuni.cz

Dotazník vyplňte co možná nejdříve po provedení testu.

### Otázky pro instruktora

Experiment proveden dne: 13.5.2020

Jméno instruktora: Kopeček

Jméno pacienta: \_\_\_\_\_ Pohlaví: Ž Věk: 56

Číslo logu aplikace: \_\_\_\_\_

Typ omezení: Paraparéza, Paraplegie, Kvadruplegie, Pentaplegie, Svalové dystrofie, ALS,

Jiné: Zápne

Popis hybnosti: PLNO

Brýle / kontaktní čočky: \_\_\_\_\_ ano /  ne

### Protokol experimentu:

1. Kalibrace senzoru
2. Vysvětlení principu a umožnění získat zkušenost s ovládáním, alespoň 10 minut
3. Uvedení aplikaci do počátečních podmínek – lůžko v bodě nula   
Čas při započetí testování: ..... 10<sup>00</sup> .....
4. Test 1 
  - a) zahájit oční kontakt s aplikací
  - b) zvednout podpěru nohou (po dobu 2-3 s)
  - c) zvednout podpěru hlavy (po dobu 2-3 s)
  - d) snížit podpěru nohou (po dobu 2-3 s)
  - e) snížit podpěru hlavy (po dobu 2-3 s)
  - f) přerušit oční kontakt s aplikací
7. Test 2 – opakování Testu 1
8. Test 3 – opakování Testu 1   
Čas při ukončení testování: ..... 10<sup>30</sup> .....

Poznámky instruktora k experimentu:



**Otázky pro pacienta**

Získal/a jste jistotu v ovládní? *ano / spíše ano / nevím / spíše ne / ne*

Jak jste spokojen/a s ovládním aplikace?

- aktivace ovládní *velmi snadná / snadná / běžná / obtížná / velmi obtížná*
- způsob volby polohy *velmi snadný / snadný / běžný / obtížný / velmi obtížný*
- informace o nastavení lůžka *velmi snadné / snadné / běžné / obtížné / velmi obtížné*
- přehlednost ovládní *velmi přehledné / přehledné / běžné / nepřehledné / velmi nepřehledné*

Upřednostnil/a byste ovládní jiným způsobem? *ano / spíše ano / nevím / spíše ne / ne*

*Pokud ano jakým (např. řeč)? .....*

Máte nějaký poznatek k testu nebo ovládní?

Jak byste hodnotil/a Vaši aktuální intenzitu bolesti na uvedené obrazové škále?

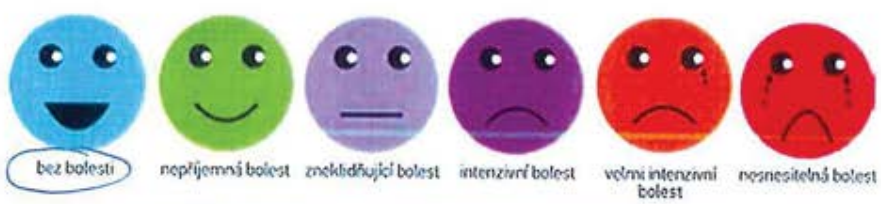

|                                                                      |                            |                          |                                                                             |
|----------------------------------------------------------------------|----------------------------|--------------------------|-----------------------------------------------------------------------------|
| <b>MALÁ NEBO ŽÁDNÁ BOLEST</b><br>Jste schopni se bolesti přizpůsobit | Velmi mírná bolest         | <input type="checkbox"/> | Velmi lehká, sotva znatelná bolest                                          |
|                                                                      | Nepříjemná bolest          | <input type="checkbox"/> | Menší bolest, lze ji přirovnat k lehkému žitpání                            |
|                                                                      | Přijatelná bolest          | <input type="checkbox"/> | Velmi nápadná bolest podobající se píchnutí injekce                         |
| <b>MÍRNÁ BOLEST</b><br>Neslučitelná s mnoha aktivitami               | Zneklidňující bolest       | <input type="checkbox"/> | Silná, hluboká bolest                                                       |
|                                                                      | Velmi zneklidňující bolest | <input type="checkbox"/> | Silná, hluboká, pronikavá bolest, např. vyvrknutý kotník                    |
|                                                                      | Intenzivní bolest          | <input type="checkbox"/> | Ještě silnější bolest srovnatelná s bodnutím několika včelích žihadel       |
| <b>TĚŽKÁ BOLEST</b><br>Nejste schopni fungovat                       | Velmi intenzivní bolest    | <input type="checkbox"/> | Bolest srovnatelná s průměrnou migrénou                                     |
|                                                                      | Naprostá hrozná bolest     | <input type="checkbox"/> | Bolest srovnatelná s porodem nebo opravdu silnou migrénou                   |
|                                                                      | Nesnesitelná bolest        | <input type="checkbox"/> | Bolest nelze ignorovat, vyžaduje léky proti bolesti, rutně navštívit lékaře |

Jak byste posoudil/a Vaši obvyklou míru zrakové pozornosti nebo výdrže při sledování běžného celovečerního filmu?

*sleduji bez problémů / sleduji s přestávkami / nemůžu sledovat / nezajímá mne to*

Děkujeme Vám za účast v experimentu a při vyplnění dotazníku...

710

C17

# Informace, dotazník a protokol experimentu pro Bezkontaktní ovládání polohovacího lůžka

řešitel: Ing. Martin Kopeček, MEng, kopecema@lfhk.cuni.cz

Dotazník vyplňte co možná nejdříve po provedení testu.

## Otázky pro instruktora

Experiment proveden dne: \_\_\_\_\_

Jméno instruktora: \_\_\_\_\_

Jméno pacienta: \_\_\_\_\_

Pohlaví: ž

Věk: 38

Číslo logu aplikace: \_\_\_\_\_

Typ omezení: Paraparéza, Paraplegie, Kvadruplegie, Pentaplegie, Svalové dystrofie, ALS,

Jiné: žádné

Popis hybnosti: 722A

Brýle / kontaktní čočky: \_\_\_\_\_

ano /  ne

## Protokol experimentu:

1. Kalibrace senzoru

2. Vysvětlení principu a umožnění získat zkušenost s ovládáním, alespoň 10 minut

3. Uvedení aplikaci do počátečních podmínek – lůžko v bodě nula

Čas při započetí testování: 14<sup>50</sup>

4. Test 1

- a) zahájit oční kontakt s aplikací
- b) **zvednout** podpěru nohou (po dobu 2-3 s)
- c) **zvednout** podpěru hlavy (po dobu 2-3 s)
- d) **snížit** podpěru nohou (po dobu 2-3 s)
- e) **snížit** podpěru hlavy (po dobu 2-3 s)
- f) přerušit oční kontakt s aplikací

7. Test 2 – opakování Testu 1

8. Test 3 – opakování Testu 1

Čas při ukončení testování: 16<sup>45</sup>

Poznámky instruktora k experimentu:

Otázky pro pacienta

Získal/a jste jistotu v ovládní?

ano / spíše ano / nevím / spíše ne / ne

Jak jste spokojen/a s ovládním aplikace?

aktivace ovládní

velmi snadná / snadná / běžná / obtížná / velmi obtížná

způsob volby polohy

velmi snadný / snadný / běžný / obtížný / velmi obtížný

informace o nastavení lůžka

velmi snadné / snadné / běžné / obtížné / velmi obtížné

přehlednost ovládní

velmi přehledné / přehledné / běžné / nepřehledné / velmi nepřehledné

Upřednostnil/a byste ovládní jiným způsobem?

ano / spíše ano / nevím / spíše ne / ne

Pokud ano jakým (např. řeč)? .....

Máte nějaký poznatek k testu nebo ovládní?

---

---

Jak byste hodnotil/a Vaši aktuální intenzitu bolesti na uvedené obrazové škále?

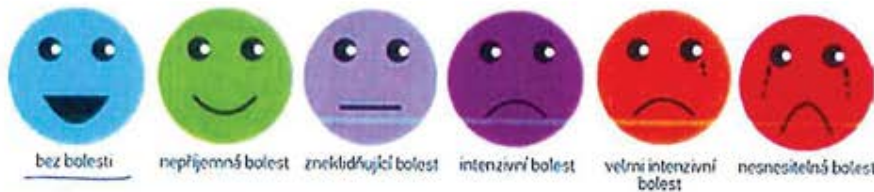

|                                                                      |                            |                          |                                                                               |
|----------------------------------------------------------------------|----------------------------|--------------------------|-------------------------------------------------------------------------------|
| <b>MALÁ NEBO ŽÁDNÁ BOLEST</b><br>Jste schopni se bolesti přizpůsobit | Velmi mírná bolest         | <input type="checkbox"/> | Velmi lehká, sotva znatelná bolest                                            |
|                                                                      | Nepříjemná bolest          | <input type="checkbox"/> | Menší bolest, lze ji přirovnat k lehkému žitpání                              |
|                                                                      | Přijatelná bolest          | <input type="checkbox"/> | Velmi nápadná bolest podobající se píchnutí injekce                           |
| <b>MÍRNÁ BOLEST</b><br>Neslučitelná s mnoha aktivitami               | Zneklidňující bolest       | <input type="checkbox"/> | Silná, hluboká bolest                                                         |
|                                                                      | Velmi zneklidňující bolest | <input type="checkbox"/> | Silná, hluboká, pronikavá bolest, např. vyvrknutý kotník                      |
|                                                                      | Intenzivní bolest          | <input type="checkbox"/> | Ještě silnější bolest srovnatelná s bodnutím několika včelích žihadel         |
| <b>TĚŽKÁ BOLEST</b><br>Nejste schopni fungovat                       | Velmi intenzivní bolest    | <input type="checkbox"/> | Bolest srovnatelná s průměrnou migrénou                                       |
|                                                                      | Naprostě hrozná bolest     | <input type="checkbox"/> | Bolest srovnatelná s porodem nebo opravdu silnou migrénou                     |
|                                                                      | Nesnesitelná bolest        | <input type="checkbox"/> | Bolest nelze ignorovat, vyžaduje léky proti bolesti, rutinně navštívit lékaře |

Jak byste posoudil/a Vaši obvyklou míru zrakové pozornosti nebo výdrže při sledování běžného celovečerního filmu?

sleduji bez problémů / sleduji s přestávkami / nemůžu sledovat / nezajímá mne to

Děkujeme Vám za účast v experimentu a při vyplnění dotazníku...



## Informace, dotazník a protokol experimentu pro Bezkontaktní ovládání polohovacího lůžka

řešitel: Ing. Martin Kopeček, MEng, kopececa@lfhk.cuni.cz

Dotazník vyplňte co možná nejdříve po provedení testu.

### Otázky pro instruktora

Experiment proveden dne: 27.5.2020

Jméno instruktora: Kopeček

Jméno pacienta:

Pohlaví: ž

Věk: 22

Číslo logu aplikace:

Typ omezení: Paraparéza, Paraplegie, Kvadruplegie, Pentaplegie, Svalové dystrofie, ALS,

Jiné: žádné

Popis hybnosti: PLND

Brýle / kontaktní čočky:

ano / ne

### Protokol experimentu:

1. Kalibrace senzoru
2. Vysvětlení principu a umožnění získat zkušenost s ovládáním, alespoň 10 minut
3. Uvedení aplikaci do počátečních podmínek – lůžko v bodě nula

Čas při započetí testování: 14<sup>00</sup>

#### 4. Test 1

- a) zahájit oční kontakt s aplikací
- b) zvednout podpěru nohou (po dobu 2-3 s)
- c) zvednout podpěru hlavy (po dobu 2-3 s)
- d) snížit podpěru nohou (po dobu 2-3 s)
- e) snížit podpěru hlavy (po dobu 2-3 s)
- f) přerušit oční kontakt s aplikací

#### 7. Test 2 – opakování Testu 1

#### 8. Test 3 – opakování Testu 1

Čas při ukončení testování: 14<sup>15</sup>

Poznámky instruktora k experimentu:

**Otázky pro pacienta**

Získal/a jste jistotu v ovládní?

ano / spíše ano / nevím / spíše ne / ne

Jak jste spokojen/a s ovládním aplikace?

aktivace ovládní

velmi snadná / snadná / běžná / obtížná / velmi obtížná

způsob volby polohy

velmi snadný / snadný / běžný / obtížný / velmi obtížný

informace o nastavení lůžka

velmi snadně / snadné / běžné / obtížné / velmi obtížné

přehlednost ovládní

velmi přehledně / přehledné / běžné / nepřehledné / velmi nepřehledné

Upřednostnil/a byste ovládní jiným způsobem?

ano / spíše ano / nevím / spíše ne / ne

Pokud ano jakým (např. řeč)? .....

Máte nějaký poznatek k testu nebo ovládní?

*- jednou či dvakrát se mi stalo, že jsem byla asi trochu rychlejší v přechodu do další fáze (ze zvolené polohy po kontakt s bílou tečkou) a vyskočilo mi to - znovu jsem musela zvolit polohu*

Jak byste hodnotil/a Vaši aktuální intenzitu bolesti na uvedené obrazové škále?

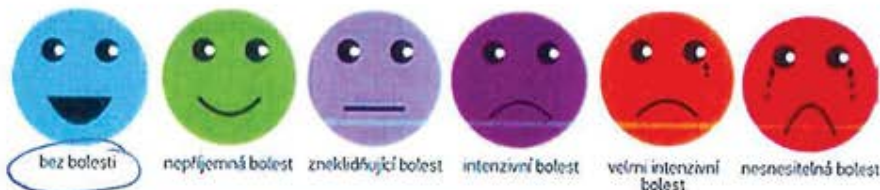

|                                                                      |                          |                          |                                                                             |
|----------------------------------------------------------------------|--------------------------|--------------------------|-----------------------------------------------------------------------------|
| <b>MALÁ NEBO ŽÁDNÁ BOLEST</b><br>Jste schopni se bolesti přizpůsobit | Velmi mírná bolest       | <input type="checkbox"/> | Velmi lehká, sotva znatelná bolest                                          |
|                                                                      | Nepříjemná bolest        | <input type="checkbox"/> | Menší bolest, lze ji přirovnat k lehkému štípání                            |
|                                                                      | Přijatelná bolest        | <input type="checkbox"/> | Velmi nápadná bolest podobající se píchnutí injekce                         |
| <b>MÍRNÁ BOLEST</b><br>Neslučitelná s mnoha aktivitami               | Zklidňující bolest       | <input type="checkbox"/> | Silná, hluboká bolest                                                       |
|                                                                      | Velmi zklidňující bolest | <input type="checkbox"/> | Silná, hluboká, pronikavá bolest, např. vyvrknutý kotník                    |
|                                                                      | Intenzivní bolest        | <input type="checkbox"/> | Ještě silnější bolest srovnatelná s bodnutím několika včelích žihadel       |
| <b>TĚŽKÁ BOLEST</b><br>Nejste schopni fungovat                       | Velmi intenzivní bolest  | <input type="checkbox"/> | Bolest srovnatelná s průměrnou migrénou                                     |
|                                                                      | Naprosto hrozná bolest   | <input type="checkbox"/> | Bolest srovnatelná s porodem nebo opravdu silnou migrénou                   |
|                                                                      | Nesnesitelná bolest      | <input type="checkbox"/> | Bolest nelze ignorovat, vyžaduje léky proti bolesti, nutně navštívit lékaře |

Jak byste posoudil/a Vaši obvyklou míru zrakové pozornosti nebo výdrže při sledování běžného celovečerního filmu?

sleduji bez problémů / sleduji s přestávkami / nemůžu sledovat / nezajímá mne to

Děkujeme Vám za účast v experimentu a při vyplnění dotazníku...

PI 0

C19

## Informace, dotazník a protokol experimentu pro Bezkontaktní ovládání polohovacího lůžka

řešitel: Ing. Martin Kopeček, MEng, kopecema@lfhk.cuni.cz

Dotazník vyplňte co možná nejdříve po provedení testu.

### Otázky pro instruktora

Experiment proveden dne: 20. 3. 2020

Jméno instruktora: KOPEČEK

Jméno pacienta:

Pohlaví: Ž

Věk: 29

Číslo logu aplikace:

Typ omezení: Paraparéza, Paraplegie, Kvadruplegie, Pentaplegie, Svalové dystrofie, ALS,

Jiné: ZÁDMĚ!

Popis hybnosti: PLAA

Brýle / kontaktní čočky:

ano / ne

### Protokol experimentu:

1. Kalibrace senzoru

2. Vysvětlení principu a umožnění získat zkušenost s ovládáním, alespoň 10 minut

3. Uvedení aplikaci do počátečních podmínek – lůžko v bodě nula

Čas při započetí testování: 8 15

4. Test 1

- a) zahájit oční kontakt s aplikací
- b) zvednout podpěru nohou (po dobu 2-3 s)
- c) zvednout podpěru hlavy (po dobu 2-3 s)
- d) snížit podpěru nohou (po dobu 2-3 s)
- e) snížit podpěru hlavy (po dobu 2-3 s)
- f) přerušit oční kontakt s aplikací

7. Test 2 – opakování Testu 1

8. Test 3 – opakování Testu 1

Čas při ukončení testování: 8 30

Poznámky instruktora k experimentu:



**Otázky pro pacienta**

Získal/a jste jistotu v ovládní?

ano / spíše ano / nevím / spíše ne / ne

Jak jste spokojen/a s ovládním aplikace?

aktivace ovládní

velmi snadná / snadná / běžná / obtížná / velmi obtížná

způsob volby polohy

velmi snadný / snadný / běžný / obtížný / velmi obtížný

informace o nastavení lůžka

velmi snadné / snadné / běžné / obtížné / velmi obtížné

přehlednost ovládní

velmi přehledné / přehledné / běžné / nepřehledné / velmi nepřehledné

Upřednostnil/a byste ovládní jiným způsobem?

ano / spíše ano / nevím / spíše ne / ne

Pokud ano jakým (např. řeč)? .....

Máte nějaký poznatek k testu nebo ovládní?

- display by mohl být dále od očí

Jak byste hodnotil/a Vaši aktuální intenzitu bolesti na uvedené obrazové škále?

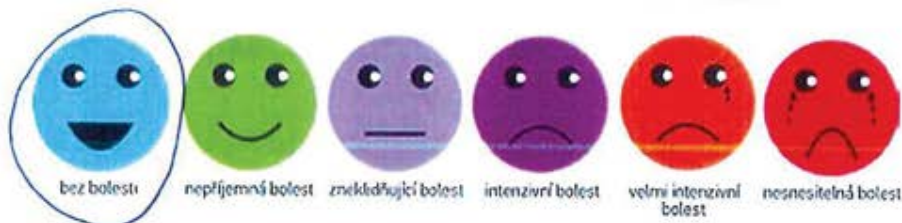

|                                                                      |                            |                          |                                                                             |
|----------------------------------------------------------------------|----------------------------|--------------------------|-----------------------------------------------------------------------------|
| <b>MALÁ NEBO ŽÁDNÁ BOLEST</b><br>Jste schopni se bolesti přizpůsobit | Velmi mírná bolest         | <input type="checkbox"/> | Velmi lehká, sotva znetelná bolest                                          |
|                                                                      | Nepříjemná bolest          | <input type="checkbox"/> | Menší bolest, lze ji přirovnat k lehkému žitpání                            |
|                                                                      | Přijatelná bolest          | <input type="checkbox"/> | Velmi nápadná bolest podobající se píchnutí injekce                         |
| <b>MÍRNÁ BOLEST</b><br>Neslučitelná s mnoha aktivitami               | Zneklidňující bolest       | <input type="checkbox"/> | Silná, hluboká bolest                                                       |
|                                                                      | Velmi zneklidňující bolest | <input type="checkbox"/> | Silná, hluboká, pronikavá bolest, např. vyvrknutý kotník                    |
|                                                                      | Intenzivní bolest          | <input type="checkbox"/> | Ještě silnější bolest srovnatelná s bodnutím několika včelích žihadel       |
| <b>TĚŽKÁ BOLEST</b><br>Nejste schopni fungovat                       | Velmi intenzivní bolest    | <input type="checkbox"/> | Bolest srovnatelná s průměrnou migrénou                                     |
|                                                                      | Naprostu hrůzná bolest     | <input type="checkbox"/> | Bolest srovnatelná s porodem nebo opravdu silnou migrénou                   |
|                                                                      | Nesnesitelná bolest        | <input type="checkbox"/> | Bolest nelze ignorovat, vyžaduje léky proti bolesti, nutné navštívit lékaře |

Jak byste posoudil/a Vaši obvyklou míru zrakové pozornosti nebo výdrže při sledování běžného celovečerního filmu?

sleduji bez problémů / sleduji s přestávkami / nemůžu sledovat / nezajímá mne to

Děkujeme Vám za účast v experimentu a při vyplnění dotazníku...

## Informace, dotazník a protokol experimentu pro Bezkontaktní ovládání polohovacího lůžka

řešitel: Ing. Martin Kopeček, MEng, kopecema@lfhk.cuni.cz

Dotazník vyplňte co možná nejdříve po provedení testu.

### Otázky pro instruktora

Experiment proveden dne: 13.5.2020

Jméno instruktora: KOPPEČEK

Jméno pacienta:

Pohlaví: M

Věk: 55

Číslo logu aplikace:

Typ omezení: Paraparéza, Paraplegie, Kvadruplegie, Pentaplegie, Svalové dystrofie, ALS,

Jiné:

zaběr

Popis hybnosti:

PLM (LRMST)

Brýle / kontaktní čočky:

ano /  ne

### Protokol experimentu:

1. Kalibrace senzoru
2. Vysvětlení principu a umožnění získat zkušenost s ovládáním, alespoň 10 minut
3. Uvedení aplikací do počátečních podmínek – lůžko v bodě nula   
Čas při započetí testování: ..... 17:30 .....
4. Test 1 
  - a) zahájit oční kontakt s aplikací
  - b) zvednout podpěru nohou (po dobu 2-3 s)
  - c) zvednout podpěru hlavy (po dobu 2-3 s)
  - d) snížit podpěru nohou (po dobu 2-3 s)
  - e) snížit podpěru hlavy (po dobu 2-3 s)
  - f) přerušit oční kontakt s aplikací
7. Test 2 – opakování Testu 1
8. Test 3 – opakování Testu 1   
Čas při ukončení testování: ..... 18:00 .....

Poznámky instruktora k experimentu:



**Otázky pro pacienta**

Získal/a jste jistotu v ovládní?

*ano / spíše ano / nevím / spíše ne / ne*

Jak jste spokojen/a s ovládním aplikace?

aktivace ovládní

*velmi snadná / snadná / běžná / obtížná / velmi obtížná*

způsob volby polohy

*velmi snadný / snadný / běžný / obtížný / velmi obtížný*

informace o nastavení lůžka

*velmi snadné / snadné / běžné / obtížné / velmi obtížné*

přehlednost ovládní

*velmi přehledné / přehledné / běžné / nepřehledné / velmi nepřehledné*

Upřednostnil/a byste ovládní jiným způsobem?

*ano / spíše ano / nevím / spíše ne / ne*

*Pokud ano jakým (např. řeč)? .....*

Máte nějaký poznatek k testu nebo ovládní?

---



---

Jak byste hodnotil/a Vaši aktuální intenzitu bolesti na uvedené obrazové škále?

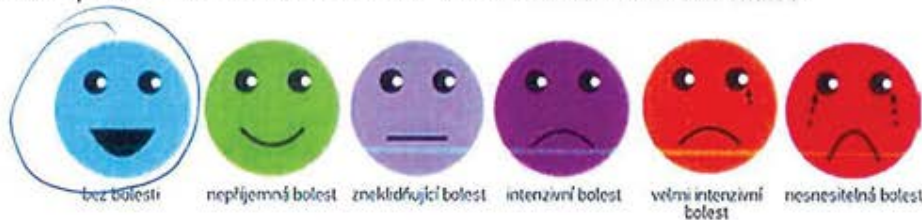

|                                                                      |                            |                          |                                                                             |
|----------------------------------------------------------------------|----------------------------|--------------------------|-----------------------------------------------------------------------------|
| <b>MALÁ NEBO ŽÁDNÁ BOLEST</b><br>Jste schopni se bolesti přizpůsobit | Velmi mírná bolest         | <input type="checkbox"/> | Velmi lehká, sotva znatelná bolest                                          |
|                                                                      | Nepříjemná bolest          | <input type="checkbox"/> | Menší bolest, lze ji přirovnat k lehkému štipání                            |
|                                                                      | Příjemná bolest            | <input type="checkbox"/> | Velmi nápadná bolest podobající se píchnutí injekce                         |
| <b>MÍRNÁ BOLEST</b><br>Neslučitelná s mnoha aktivitami               | Zneklidňující bolest       | <input type="checkbox"/> | Silná, hluboká bolest                                                       |
|                                                                      | Velmi zneklidňující bolest | <input type="checkbox"/> | Silná, hluboká, pronikavá bolest, např. vyvrknutý kotník                    |
|                                                                      | Intenzivní bolest          | <input type="checkbox"/> | Ještě silnější bolest srovnatelná s bodnutím několika včelích žihadel       |
| <b>TĚŽKÁ BOLEST</b><br>Nejste schopni fungovat                       | Velmi intenzivní bolest    | <input type="checkbox"/> | Bolest srovnatelná s průměrnou migrénou                                     |
|                                                                      | Naprostě hrozná bolest     | <input type="checkbox"/> | Bolest srovnatelná s porodem nebo opravdu silnou migrénou                   |
|                                                                      | Nesnesitelná bolest        | <input type="checkbox"/> | Bolest nelze ignorovat, vyžaduje léky proti bolesti, nutně navštívit lékaře |

Jak byste posoudil/a Vaši obvyklou míru zrakové pozornosti nebo výdrže při sledování běžného celovečerního filmu?

*sleduji bez problémů / sleduji s přestávkami / nemůžu sledovat / nezajímá mne to*

Děkujeme Vám za účast v experimentu a při vyplnění dotazníku...



Informace, dotazník a protokol experimentu pro  
Bezkontaktní ovládání polohovacího lůžka

řešitel: Ing. Martin Kopeček, MEng, kopecema@lfhk.cuni.cz

Dotazník vyplňte co možná nejdříve po provedení testu.

Otázky pro instruktora

Experiment proveden dne: 12.5.2020

Jméno instruktora: KOPEČEK

Jméno pacienta:

Pohlaví: M

Věk: 45

Číslo logu aplikace:

Typ omezení: Paraparéza, Paraplegie, Kvadruplegie, Pentaplegie, Svalové dystrofie, ALS,

Jiné: žádná

Popis hybnosti: PLND

Brýle / kontaktní čočky:

ano / ne

Protokol experimentu:

1. Kalibrace senzoru
2. Vysvětlení principu a umožnění získat zkušenost s ovládáním, alespoň 10 minut
3. Uvedení aplikaci do počátečních podmínek – lůžko v bodě nula   
Čas při započítí testování: 14<sup>15</sup> .....
4. Test 1 
  - a) zahájit oční kontakt s aplikací
  - b) zvednout podpěru nohou (po dobu 2-3 s)
  - c) zvednout podpěru hlavy (po dobu 2-3 s)
  - d) snížit podpěru nohou (po dobu 2-3 s)
  - e) snížit podpěru hlavy (po dobu 2-3 s)
  - f) přerušit oční kontakt s aplikací
7. Test 2 – opakování Testu 1
8. Test 3 – opakování Testu 1   
Čas při ukončení testování: 14<sup>30</sup> .....

Poznámky instruktora k experimentu:

## Otázky pro pacienta

Získal/a jste jistotu v ovládní?

ano / spíše ano / nevím / spíše ne / ne

Jak jste spokojen/a s ovládním aplikace?

aktivace ovládní

velmi snadná / snadná / běžná / obtížná / velmi obtížná

způsob volby polohy

velmi snadný / snadný / běžný / obtížný / velmi obtížný

informace o nastavení lůžka

velmi snadné / snadné / běžné / obtížné / velmi obtížné

přehlednost ovládní

velmi přehledné / přehledné / běžné / nepřehledné / velmi nepřehledné

Upřednostnil/a byste ovládní jiným způsobem?

ano / spíše ano / nevím / spíše ne / ne

Pokud ano jakým (např. řeč)? ..... LEEG .....

Máte nějaký poznatek k testu nebo ovládní?

ПРЕПИНАЮ ПОЛОЖ (ПОИТИ ИЛИ ВА) SE ОБЧАС ТЭЖКОПІДНУЄ,  
РЕАГУЄ НА 2.-3. ПОІС

Jak byste hodnotil/a Vaši aktuální intenzitu bolesti na uvedené obrazové škále?

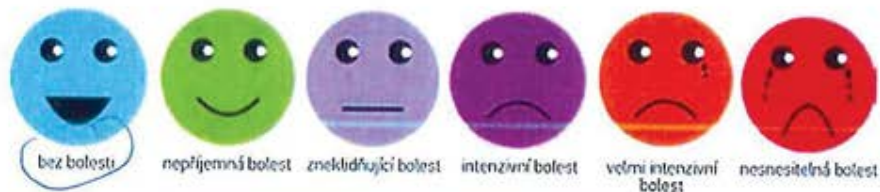

|                                                                      |                            |                          |                                                                             |
|----------------------------------------------------------------------|----------------------------|--------------------------|-----------------------------------------------------------------------------|
| <b>MALÁ NEBO ŽÁDNÁ BOLEST</b><br>Jste schopni se bolesti přizpůsobit | Velmi mírná bolest         | <input type="checkbox"/> | Velmi lehká, sotva znatelná bolest                                          |
|                                                                      | Nepřijemná bolest          | <input type="checkbox"/> | Menší bolest, lze ji přirovnat k lehkému štípání                            |
|                                                                      | Přijatelná bolest          | <input type="checkbox"/> | Velmi nápadná bolest podobající se píchnutí injekce                         |
| <b>MÍRNÁ BOLEST</b><br>Neslučitelná s mnoha aktivitami               | Zneklidňující bolest       | <input type="checkbox"/> | Silná, hluboká bolest                                                       |
|                                                                      | Velmi zneklidňující bolest | <input type="checkbox"/> | Silná, hluboká, pronikavá bolest, např. vyvrknutý kotník                    |
|                                                                      | Intenzivní bolest          | <input type="checkbox"/> | Ještě silnější bolest srovnatelná s bodnutím několika včelích žihadel       |
| <b>TĚŽKÁ BOLEST</b><br>Nejste schopni fungovat                       | Velmi intenzivní bolest    | <input type="checkbox"/> | Bolest srovnatelná s průměrnou migrénou                                     |
|                                                                      | Naprosto hrozná bolest     | <input type="checkbox"/> | Bolest srovnatelná s porodem nebo opravdu silnou migrénou                   |
|                                                                      | Nesnesitelná bolest        | <input type="checkbox"/> | Bolest nelze ignorovat, vyžaduje léky proti bolesti, nutně navštívit lékaře |

Jak byste posoudil/a Vaši obvyklou míru zrakové pozornosti nebo výdrže při sledování běžného celovečerního filmu?

sleduji bez problémů / sleduji s přestávkami / nemůžu sledovat / nezajímá mne to

Děkujeme Vám za účast v experimentu a při vyplnění dotazníku...

Informace, dotazník a protokol experimentu pro  
**Bezkontaktní ovládání polohovacího lůžka**

řešitel: Ing. Martin Kopeček, MEng, kopecema@lfhk.cuni.cz

C22

Dotazník vyplňte co možná nejdříve po provedení testu.

**Otázky pro instruktora**

Experiment proveden dne: 12.5.2020

Jméno instruktora: KOPČEK

Jméno pacienta:

Pohlaví: M

Věk: 72

Číslo logu aplikace:

Typ omezení: Paraparéza, Paraplegie, Kvadruplegie, Pentaplegie, Svalové dystrofie, ALS,

Jiné: KEMN

Popis hybnosti: PLNA

Brýle / kontaktní čočky:

ano / ne

**Protokol experimentu:**

1. Kalibrace senzoru
2. Vysvětlení principu a umožnění získat zkušenost s ovládáním, alespoň 10 minut
3. Uvedení aplikaci do počátečních podmínek – lůžko v bodě nula   
Čas při započítí testování: ..... 17 15
4. Test 1 
  - a) zahájit oční kontakt s aplikací
  - b) zvednout podpěru nohou (po dobu 2-3 s)
  - c) zvednout podpěru hlavy (po dobu 2-3 s)
  - d) snížit podpěru nohou (po dobu 2-3 s)
  - e) snížit podpěru hlavy (po dobu 2-3 s)
  - f) přerušit oční kontakt s aplikací
7. Test 2 – opakování Testu 1
8. Test 3 – opakování Testu 1   
Čas při ukončení testování: ..... 17 45

Poznámky instruktora k experimentu:



**Otázky pro pacienta**

Získal/a jste jistotu v ovládnání?

*ano / spíše ano / nevím / spíše ne / ne*

Jak jste spokojen/a s ovládním aplikace?

aktivace ovládní *velmi snadná / snadná / běžná / obtížná / velmi obtížná*  
 způsob volby polohy *velmi snadný / snadný / běžný / obtížný / velmi obtížný*  
 informace o nastavení lůžka *velmi snadné / snadné / běžné / obtížné / velmi obtížné*  
 přehlednost ovládní *velmi přehledné / přehledné / běžné / nepřehledné / velmi nepřehledné*

Upřednostnil/a byste ovládní jiným způsobem?

*ano / spíše ano / nevím / spíše ne / ne*

*Pokud ano jakým (např. řeč)? .....*

Máte nějaký poznatek k testu nebo ovládní?

*NE*

Jak byste hodnotil/a Vaši aktuální intenzitu bolesti na uvedené obrazové škále?

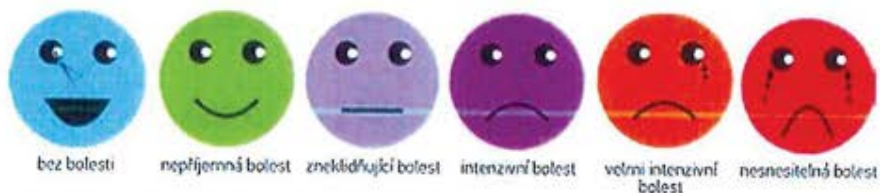

|                                                                      |                            |                          |                                                                             |
|----------------------------------------------------------------------|----------------------------|--------------------------|-----------------------------------------------------------------------------|
| <b>MALÁ NEBO ŽÁDNÁ BOLEST</b><br>Jste schopni se bolesti přizpůsobit | Velmi mírná bolest         | <input type="checkbox"/> | Velmi lehká, sotva zratelná bolest                                          |
|                                                                      | Nepřijemná bolest          | <input type="checkbox"/> | Menší bolest, lze ji přirovnat k lehkému žitpání                            |
|                                                                      | Přijatelná bolest          | <input type="checkbox"/> | Velmi nápadná bolest podobající se píchnutí injekce                         |
| <b>MÍRNÁ BOLEST</b><br>Neslučitelná s mnoha aktivitami               | Zneklidňující bolest       | <input type="checkbox"/> | Silná, hluboká bolest                                                       |
|                                                                      | Velmi zneklidňující bolest | <input type="checkbox"/> | Silná, hluboká, pronikavá bolest, např. vyvrknutý kotník                    |
|                                                                      | Intenzivní bolest          | <input type="checkbox"/> | Ještě silnější bolest srovnatelná s bodnutím několika včelích žihadel       |
| <b>TĚŽKÁ BOLEST</b><br>Nejste schopni fungovat                       | Velmi intenzivní bolest    | <input type="checkbox"/> | Bolest srovnatelná s průměrnou migrénou                                     |
|                                                                      | Naprostu hrozná bolest     | <input type="checkbox"/> | Bolest srovnatelná s porodem nebo opravdu silnou migrénou                   |
|                                                                      | Nesnesitelná bolest        | <input type="checkbox"/> | Bolest nelze ignorovat, vyžaduje léky proti bolesti, nutné navštívit lékaře |

Jak byste posoudil/a Vaši obvyklou míru zrakové pozornosti nebo výdrže při sledování běžného celovečerního filmu?

*sleduji bez problémů / sleduji s přestávkami / nemůžu sledovat / nezajímá mne to*

Děkujeme Vám za účast v experimentu a při vyplnění dotazníku...

## Informace, dotazník a protokol experimentu pro Bezkontaktní ovládání polohovacího lůžka

řešitel: Ing. Martin Kopeček, MEng, kopecema@lfhk.cuni.cz

Dotazník vyplňte co možná nejdříve po provedení testu.

### Otázky pro instruktora

Experiment proveden dne: 11.5.2020

Jméno instruktora: KOPEČEK

Jméno pacienta: C

Pohlaví: M

Věk: 56

Číslo logu aplikace:

Typ omezení: Paraparéza, Paraplegie, Kvadruplegie, Pentaplegie, Svalové dystrofie, ALS,

Jiné: NEMD

Popis hybnosti: PLM

Brýle / kontaktní čočky: f

ano /  ne

### Protokol experimentu:

1. Kalibrace senzoru
2. Vysvětlení principu a umožnění získat zkušenost s ovládáním, alespoň 10 minut
3. Uvedení aplikaci do počátečních podmínek – lůžko v bodě nula

Čas při započítí testování: 13<sup>00</sup>

#### 4. Test 1

- a) zahájit oční kontakt s aplikací
- b) zvednout podpěru nohou (po dobu 2-3 s)
- c) zvednout podpěru hlavy (po dobu 2-3 s)
- d) snížit podpěru nohou (po dobu 2-3 s)
- e) snížit podpěru hlavy (po dobu 2-3 s)
- f) přerušit oční kontakt s aplikací

#### 7. Test 2 – opakování Testu 1

#### 8. Test 3 – opakování Testu 1

Čas při ukončení testování: 13<sup>30</sup>

Poznámky instruktora k experimentu:

**Otázky pro pacienta**

Získal/a jste jistotu v ovládnání?

*ano / spíše ano / nevím / spíše ne / ne*

Jak jste spokojen/a s ovládním aplikace?

aktivace ovládní

*velmi snadná / snadná / běžná / obtížná / velmi obtížná*

způsob volby polohy

*velmi snadný / snadný / běžný / obtížný / velmi obtížný*

informace o nastavení lůžka

*velmi snadné / snadné / běžné / obtížné / velmi obtížné*

přehlednost ovládní

*velmi přehledné / přehledné / běžné / nepřehledné / velmi nepřehledné*

Upřednostnil/a byste ovládní jiným způsobem?

*ano / spíše ano / nevím / spíše ne / **ne***

*Pokud ano jakým (např. řeč)? .....*

Máte nějaký poznatek k testu nebo ovládní?

*NE*

Jak byste hodnotil/a Vaši aktuální intenzitu bolesti na uvedené obrazové škále?

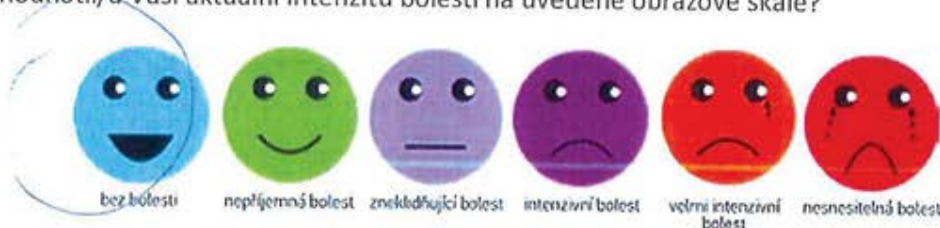

|                                                                      |                            |                          |                                                                             |
|----------------------------------------------------------------------|----------------------------|--------------------------|-----------------------------------------------------------------------------|
| <b>MALÁ NEBO ŽÁDNÁ BOLEST</b><br>Jste schopni se bolesti přizpůsobit | Velmi mírná bolest         | <input type="checkbox"/> | Velmi lehká, sotva znatelná bolest                                          |
|                                                                      | Nepříjemná bolest          | <input type="checkbox"/> | Menší bolest, lze ji přirovnat k lehkému štípání                            |
|                                                                      | Příjemná bolest            | <input type="checkbox"/> | Velmi nápadná bolest podobající se píchnutí injekce                         |
| <b>MÍRNÁ BOLEST</b><br>Neslučitelná s mnoha aktivitami               | Zneklidňující bolest       | <input type="checkbox"/> | Silná, hluboká bolest                                                       |
|                                                                      | Velmi zneklidňující bolest | <input type="checkbox"/> | Silná, hluboká, pronikavá bolest, např. vyvrknutý kotník                    |
|                                                                      | Intenzivní bolest          | <input type="checkbox"/> | Ještě silnější bolest srovnatelná s bodnutím několika včelích žihadel       |
| <b>TĚŽKÁ BOLEST</b><br>Nejste schopni fungovat                       | Velmi intenzivní bolest    | <input type="checkbox"/> | Bolest srovnatelná s průměrnou migrénou                                     |
|                                                                      | Naprosto hrozná bolest     | <input type="checkbox"/> | Bolest srovnatelná s porodem nebo opravdu silnou migrénou                   |
|                                                                      | Nesnesitelná bolest        | <input type="checkbox"/> | Bolest nelze ignorovat, vyžaduje léky proti bolesti, nutně navštívit lékaře |

Jak byste posoudil/a Vaši obvyklou míru zrakové pozornosti nebo výdrže při sledování běžného celovečerního filmu?

*sleduji bez problémů / sleduji s přestávkami / nemůžu sledovat / nezajímá mne to*

Děkujeme Vám za účast v experimentu a při vyplnění dotazníku...



**Otázky pro pacienta**

Získal/a jste jistotu v ovládnání?

ano / *spíše ano* / nevím / *spíše ne* / ne

Jak jste spokojen/a s ovládnáním aplikace?

aktivace ovládnání

*velmi snadná* / *snadná* / běžná / obtížná / velmi obtížná

způsob volby polohy

*velmi snadný* / *snadný* / běžný / obtížný / velmi obtížný

informace o nastavení lůžka

*velmi snadné* / *snadné* / běžné / obtížné / velmi obtížné

přehlednost ovládnání

*velmi přehledné* / *přehledné* / *běžné* / nepřehledné / velmi nepřehledné

Upřednostnil/a byste ovládnání jiným způsobem?

ano / *spíše ano* / nevím / *spíše ne* / ne

*Pokud ano jakým (např. řeč)?* .....

Máte nějaký poznatek k testu nebo ovládnání?

*Vylepsit kontrast/informace o tom, kde se nacházejí a i co dělat v průběhu potvrdování.*

Jak byste hodnotil/a Vaši aktuální intenzitu bolesti na uvedené obrazové škále?

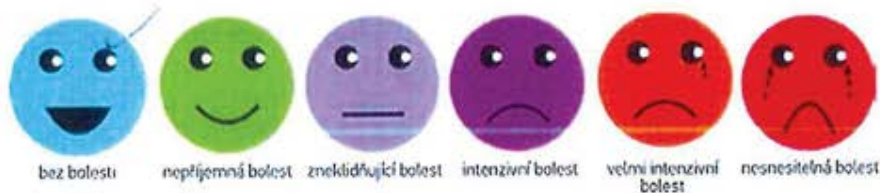

|                                                                      |                            |                          |                                                                             |
|----------------------------------------------------------------------|----------------------------|--------------------------|-----------------------------------------------------------------------------|
| <b>MALÁ NEBO ŽÁDNÁ BOLEST</b><br>Jste schopni se bolesti přizpůsobit | Velmi mírná bolest         | <input type="checkbox"/> | Velmi lehká, sotva znatelná bolest                                          |
|                                                                      | Nepřijemná bolest          | <input type="checkbox"/> | Menší bolest, lze ji přirovnat k lehkému šitpání                            |
|                                                                      | Přijatelná bolest          | <input type="checkbox"/> | Velmi nápadná bolest podobající se píchnutí injekce                         |
| <b>MÍRNÁ BOLEST</b><br>Neslučitelná s mnoha aktivitami               | Zneklidňující bolest       | <input type="checkbox"/> | Silná, hluboká bolest                                                       |
|                                                                      | Velmi zneklidňující bolest | <input type="checkbox"/> | Silná, hluboká, pronikavá bolest, např. vyvrknutý kotník                    |
|                                                                      | Intenzivní bolest          | <input type="checkbox"/> | Ještě silnější bolest srovnatelná s bodnutím několika včelích žihadel       |
| <b>TĚŽKÁ BOLEST</b><br>Nejste schopni fungovat                       | Velmi intenzivní bolest    | <input type="checkbox"/> | Bolest srovnatelná s průměrnou migrénou                                     |
|                                                                      | Naprosto hrozná bolest     | <input type="checkbox"/> | Bolest srovnatelná s porodem nebo opravdu silnou migrénou                   |
|                                                                      | Nesnesitelná bolest        | <input type="checkbox"/> | Bolest nelze ignorovat, vyžaduje léky proti bolesti, nutně navštívit lékaře |

Jak byste posoudil/a Vaši obvyklou míru zrakové pozornosti nebo výdrže při sledování běžného celovečerního filmu?

*sleduji bez problémů* / sleduji s přestávkami / nemůžu sledovat / nezajímá mne to

Děkujeme Vám za účast v experimentu a při vyplnění dotazníku...

Informace, dotazník a protokol experimentu pro  
**Bezkontaktní ovládání polohovacího lůžka**

řešitel: Ing. Martin Kopeček, MEng, kopece@lfhk.cuni.cz

C24

Dotazník vyplňte co možná nejdříve po provedení testu.

**Otázky pro instruktora**

Experiment proveden dne: 5.5.2020

Jméno instruktora: KOPĚČEK M.

Jméno pacienta:

Pohlaví: M

Věk: 41

Číslo logu aplikace:

Typ omezení: Paraparéza, Paraplegie, Kvadruplegie, Pentaplegie, Svalové dystrofie, ALS,

Jiné: ZDRAVÍ

Popis hybnosti: PLND

Brýle / kontaktní čočky:

ano / ne

**Protokol experimentu:**

1. Kalibrace senzoru
2. Vysvětlení principu a umožnění získat zkušenost s ovládáním, alespoň 10 minut
3. Uvedení aplikaci do počátečních podmínek – lůžko v bodě nula   
Čas při započítí testování: 12 15
4. Test 1 
  - a) zahájit oční kontakt s aplikací
  - b) zvednout podpěru nohou (po dobu 2-3 s)
  - c) zvednout podpěru hlavy (po dobu 2-3 s)
  - d) snížit podpěru nohou (po dobu 2-3 s)
  - e) snížit podpěru hlavy (po dobu 2-3 s)
  - f) přerušit oční kontakt s aplikací
7. Test 2 – opakování Testu 1
8. Test 3 – opakování Testu 1   
Čas při ukončení testování: 12 30

Poznámky instruktora k experimentu:

## Informace, dotazník a protokol experimentu pro Bezkontaktní ovládání polohovacího lůžka

řešitel: Ing. Martin Kopeček, MEng, kopececa@lfhk.cuni.cz

Dotazník vyplňte co možná nejdříve po provedení testu.

### Otázky pro instruktora

Experiment proveden dne: 5.5.2020

Jméno instruktora: KOPEČEK M.

Jméno pacienta: M 52

Číslo logu aplikace: 2.1.2

Typ omezení: Paraparéza, Paraplegie, Kvadruplegie, Pentaplegie, Svalové dystrofie, ALS,

jiné: ZÁDNE'

Popis hybnosti: PLNO'

Brýle / kontaktní čočky: ano / ne

### Protokol experimentu:

1. Kalibrace senzoru
2. Vysvětlení principu a umožnění získat zkušenost s ovládáním, alespoň 10 minut
3. Uvedení aplikaci do počátečních podmínek – lůžko v bodě nula   
Čas při započetí testování: 9<sup>00</sup>
4. Test 1 
  - a) zahájit oční kontakt s aplikací
  - b) zvednout podpěru nohou (po dobu 2-3 s)
  - c) zvednout podpěru hlavy (po dobu 2-3 s)
  - d) snížit podpěru nohou (po dobu 2-3 s)
  - e) snížit podpěru hlavy (po dobu 2-3 s)
  - f) přerušit oční kontakt s aplikací
7. Test 2 – opakování Testu 1
8. Test 3 – opakování Testu 1   
Čas při ukončení testování: 11<sup>00</sup>

Poznámky instruktora k experimentu:



Otázky pro pacienta

Získal/a jste jistotu v ovládnání? ano / spíše ano / nevím / spíše ne / ne

Jak jste spokojen/a s ovládním aplikace?

aktivace ovládní velmi snadná / snadná / běžná / obtížná / velmi obtížná  
 způsob volby polohy velmi snadný / snadný / běžný / obtížný / velmi obtížný  
 informace o nastavení lůžka velmi snadné / snadné / běžné / obtížné / velmi obtížné  
 přehlednost ovládní velmi přehledné / přehledné / běžné / nepřehledné / velmi nepřehledné

Upřednostnil/a byste ovládní jiným způsobem? ano / spíše ano / nevím / spíše ne / ne

Pokud ano jakým (např. řeč)? .....

Máte nějaký poznatek k testu nebo ovládní?

*Pomohl by mi kurzor,  
 když by byl v místě pohledu.*

Jak byste hodnotil/a Vaši aktuální intenzitu bolesti na uvedené obrazové škále?

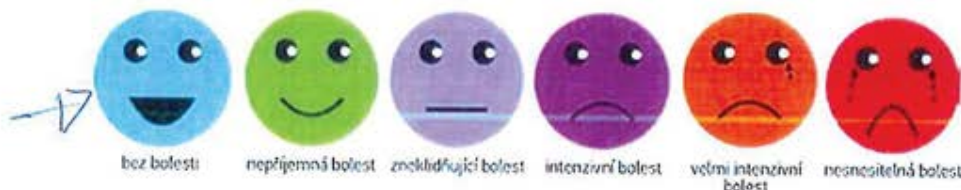

|                                                                      |                            |                          |                                                                             |
|----------------------------------------------------------------------|----------------------------|--------------------------|-----------------------------------------------------------------------------|
| <b>MALÁ NEBO ŽÁDNÁ BOLEST</b><br>Jste schopni se bolesti přizpůsobit | Velmi mírná bolest         | <input type="checkbox"/> | Velmi lehká, sotva znatelná bolest                                          |
|                                                                      | Nepřijemná bolest          | <input type="checkbox"/> | Menší bolest, lze ji přirovnat k lehkému žitpání                            |
|                                                                      | Přijatelná bolest          | <input type="checkbox"/> | Velmi nápadná bolest podobající se píchnutí injekce                         |
| <b>MÍRNÁ BOLEST</b><br>Neslučitelná s mnoha aktivitami               | Zneklidňující bolest       | <input type="checkbox"/> | Silná, hluboká bolest                                                       |
|                                                                      | Velmi zneklidňující bolest | <input type="checkbox"/> | Silná, hluboká, pronikavá bolest, např. vyvrknutý kotník                    |
|                                                                      | Intenzivní bolest          | <input type="checkbox"/> | Ještě silnější bolest srovnatelná s bodnutím několika včelích žihadel       |
| <b>TĚŽKÁ BOLEST</b><br>Nejste schopni fungovat                       | Velmi intenzivní bolest    | <input type="checkbox"/> | Bolest srovnatelná s průměrnou migrénou                                     |
|                                                                      | Naprosto hrozná bolest     | <input type="checkbox"/> | Bolest srovnatelná s porodem nebo opravdu silnou migrénou                   |
|                                                                      | Nesnesitelná bolest        | <input type="checkbox"/> | Bolest nelze ignorovat, vyžaduje léky proti bolesti, nutné navštívit lékaře |

Jak byste posoudil/a Vaši obvyklou míru zrakové pozornosti nebo výdrže při sledování běžného celovečerního filmu?

sleduji bez problémů / sleduji s přestávkami / nemůžu sledovat / nezajímá mne to

Děkujeme Vám za účast v experimentu a při vyplnění dotazníku...

*... Problem :)*

220

C26

# Informace, dotazník a protokol experimentu pro Bezkontaktní ovládání polohovacího lůžka

řešitel: Ing. Martin Kopeček, MEng, kopecema@lfhk.cuni.cz

Dotazník vyplňte co možná nejdříve po provedení testu.

## Otázky pro instruktora

Experiment proveden dne: \_\_\_\_\_

Jméno instruktora: \_\_\_\_\_

Jméno pacienta: \_\_\_\_\_ Pohlaví: 8 Věk: 59

Číslo logu aplikace: 1,2,3

Typ omezení: Paraparéza, Paraplegie, Kvadruplegie, Pentaplegie, Svalové dystrofie, ALS, \_\_\_\_\_

Jiné: \_\_\_\_\_

Popis hybnosti: PLM

Brýle / kontaktní čočky: \_\_\_\_\_ ano / ne

## Protokol experimentu:

- 1. Kalibrace senzoru
- 2. Vysvětlení principu a umožnění získat zkušenost s ovládáním, alespoň 10 minut
- 3. Uvedení aplikaci do počátečních podmínek – lůžko v bodě nula

Čas při započetí testování: ..... 11:45 .....

- 4. Test 1 
  - a) zahájit oční kontakt s aplikací
  - b) **zvednout** podpěru nohou (po dobu 2-3 s)
  - c) **zvednout** podpěru hlavy (po dobu 2-3 s)
  - d) **snížit** podpěru nohou (po dobu 2-3 s)
  - e) **snížit** podpěru hlavy (po dobu 2-3 s)
  - f) přerušit oční kontakt s aplikací

7. Test 2 – opakování Testu 1

8. Test 3 – opakování Testu 1   
Čas při ukončení testování: ..... 11:53 .....

Poznámky instruktora k experimentu: OK



## Otázky pro pacienta

Získal/a jste jistotu v ovládní?

ano / spíše ano/ nevím / spíše ne / ne

Jak jste spokojen/a s ovládním aplikace?

aktivace ovládní

velmi snadná / snadná / běžná / obtížná / velmi obtížná

způsob volby polohy

velmi snadný snadný / běžný / obtížný / velmi obtížný

informace o nastavení lůžka

velmi snadné / snadné / běžné / obtížné / velmi obtížnépřehlednost ovládní velmi přehledné / přehledné / běžné / nepřehledné / velmi nepřehledné

Upřednostnil/a byste ovládní jiným způsobem?

ano / spíše ano/ nevím / spíše ne / ~~ne~~

Pokud ano jakým (např. řeč)? .....

Máte nějaký poznatek k testu nebo ovládní?

Jak byste hodnotil/a Vaši aktuální intenzitu bolesti na uvedené obrazové škále?

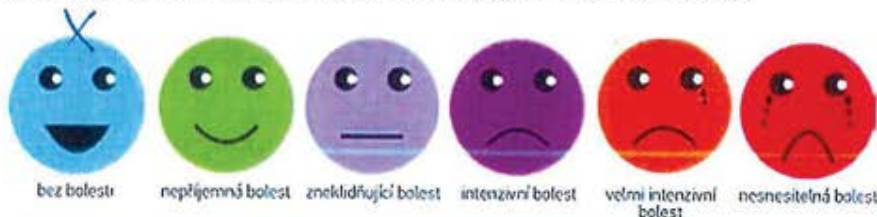

|                                                                      |                           |                          |                                                                             |
|----------------------------------------------------------------------|---------------------------|--------------------------|-----------------------------------------------------------------------------|
| <b>MALÁ NEBO ŽÁDNÁ BOLEST</b><br>Jste schopni se bolesti přizpůsobit | Velmi mírná bolest        | <input type="checkbox"/> | Velmi lehká, sotva znatelná bolest                                          |
|                                                                      | Nepříjemná bolest         | <input type="checkbox"/> | Menší bolest, lze ji přirovnat k lehkému štipání                            |
|                                                                      | Přijatelná bolest         | <input type="checkbox"/> | Velmi nápadná bolest podobající se píchnutí injekce                         |
| <b>MÍRNÁ BOLEST</b><br>Neslučitelná s mnoha aktivitami               | Znekidňující bolest       | <input type="checkbox"/> | Silná, hluboká bolest                                                       |
|                                                                      | Velmi znekidňující bolest | <input type="checkbox"/> | Silná, hluboká, pronikavá bolest, např. vyvrknutý kotník                    |
|                                                                      | Intenzivní bolest         | <input type="checkbox"/> | Ještě silnější bolest srovnatelná s bodnutím několika včelích žihadel       |
| <b>TĚŽKÁ BOLEST</b><br>Nejste schopni fungovat                       | Velmi intenzivní bolest   | <input type="checkbox"/> | Bolest srovnatelná s průměrnou migrénou                                     |
|                                                                      | Naprostě hrozná bolest    | <input type="checkbox"/> | Bolest srovnatelná s porodem nebo opravdu silnou migrénou                   |
|                                                                      | Nesnesitelná bolest       | <input type="checkbox"/> | Bolest nelze ignorovat, vyžaduje léky proti bolesti, nutné navštívit lékaře |

Jak byste posoudil/a Vaši obvyklou míru zrakové pozornosti nebo výdrže při sledování běžného celovečerního filmu?

Sleduji bez problémů / sleduji s přestávkami / nemůžu sledovat / nezajímá mne to

Děkujeme Vám za účast v experimentu a při vyplnění dotazníku...
